# Supplementary material
Source: HighWire-hosted journal article supplement (https://www.cmaj.ca/highwire/filestream/149615/field_highwire_adjunct_files/0/230459-res-1-at.pdf)
Supplement: 230459-res-1-at.pdf [file 230459-res-1-at.pdf]

# Supplementary Material

## Contents

|                                                                                                                |    |
|----------------------------------------------------------------------------------------------------------------|----|
| <b>eTable 1 Summary of Previous Systematic Reviews exploring Predictors of Opioid Overdose</b> .....           | 4  |
| <b>eTable 2 Baseline characteristics of 28 eligible studies and 7 studies with overlapped population</b> ..... | 6  |
| <b>eTable 3 Risk of bias assessment of 28 eligible studies and 7 studies with overlapped population</b> ....   | 12 |
| <b>eTable 4 GRADE evidence profile of prevalence of fatal or non-fatal overdose</b> .....                      | 14 |
| <b>eTable 5 Dose-response relationship between opioid dose and fatal/nonfatal overdose</b> .....               | 15 |
| <b>eTable 6 GRADE evidence profile of opioid prescribing factors associated with opioid overdose</b> ....      | 16 |
| <b>eTable 7 GRADE evidence profile of co-prescription factors associated with opioid overdose</b> .....        | 17 |
| <b>eTable 8 GRADE evidence profile of psychological factors associated with opioid overdose</b> .....          | 18 |
| <b>eTable 9 GRADE evidence profile of medical factors associated with opioid overdose</b> .....                | 19 |
| <b>eTable 10 GRADE evidence profile of socio-demographic factors associated with opioid overdose</b> ..        | 22 |
| <b>eTable 11 Consistency of results of predictors between pooled and unpooled studies</b> .....                | 24 |
| <b>eTable 12 Summary table of opioid tapering or discontinuation</b> .....                                     | 26 |
| <b>eTable 13 Significant associations of six unpooled predictors with opioid overdose</b> .....                | 30 |
| <b>eTable 14 Non-significant associations of 23 unpooled predictors with opioid overdose</b> .....             | 32 |
| <b>eTable 15 Subgroup analyses of pre-defined factors for opioid overdose</b> # .....                          | 33 |
| <b>eTable 16 Sensitivity analyses to test robustness of results</b> *,# .....                                  | 44 |
| <b>eFigure 1 Meta-analysis of the prevalence of opioid overdose</b> .....                                      | 52 |
| eFigure 1A Pooled prevalence of fatal overdose.....                                                            | 52 |
| eFigure 1B Pooled prevalence of non-fatal overdose.....                                                        | 53 |
| <b>eFigure 2 Meta-analysis of the association of opioid prescribing factors</b> .....                          | 54 |
| eFigure 2A Dose-response relationship between opioid dose and fatal/nonfatal overdose .....                    | 54 |
| eFigure 2B Predictor of opioid dose (every 50mg increment on a morphine equivalent dose) .....                 | 55 |
| eFigure 2C Predictor of opioid dispensing at multiple pharmacies: $\geq 3$ vs. less .....                      | 56 |
| eFigure 2D Predictor of multiple opioid prescribers: $\geq 4$ vs. less .....                                   | 56 |
| eFigure 2E Predictor of fentanyl (including both transmucosal and transdermal fentanyl).....                   | 57 |
| eFigure 2F Predictor of long- vs. short-acting opioids .....                                                   | 57 |
| eFigure 2G Predictor of number of naloxone prescriptions .....                                                 | 58 |
| <b>eFigure 3 Meta-analysis of the association of co-medication factors</b> .....                               | 59 |
| eFigure 3A Predictor of use of benzodiazepines: current vs history .....                                       | 59 |
| eFigure 3B Predictor of anticonvulsants .....                                                                  | 60 |
| eFigure 3C Predictor of sedatives and hypnotics .....                                                          | 60 |
| eFigure 3D Predictor of muscle relaxants .....                                                                 | 61 |

|                                                                                                                                       |    |
|---------------------------------------------------------------------------------------------------------------------------------------|----|
| <b>eFigure 4 Meta-analysis of the association of psychological factors</b> .....                                                      | 62 |
| eFigure 4A Predictor of depression or use of antidepressants: current vs history.....                                                 | 62 |
| eFigure 4B Predictor of bipolar disorder.....                                                                                         | 63 |
| eFigure 4C Predictor of psychotic disorders or use of antipsychotics: current vs history.....                                         | 64 |
| eFigure 4D Predictor of tobacco use or use disorder: tobacco use vs. tobacco use disorder .....                                       | 65 |
| eFigure 4E Predictor of anxiety.....                                                                                                  | 66 |
| <b>eFigure 5 Meta-analysis of the association of medical factors</b> .....                                                            | 67 |
| eFigure 5A Predictor of previous overdose.....                                                                                        | 67 |
| eFigure 5B Predictor of pancreatitis.....                                                                                             | 67 |
| <b>eFigure 6 Meta-analysis of the association of socio-demographic factors</b> .....                                                  | 68 |
| eFigure 6A Predictor of age (every 10-year decrement) .....                                                                           | 68 |
| eFigure 6B Predictor of sex (Male vs. Female).....                                                                                    | 69 |
| eFigure 6C Predictor of marital status: non-married vs. married .....                                                                 | 70 |
| eFigure 6D Predictor of White race vs others .....                                                                                    | 70 |
| eFigure 6E Predictor of geographic region in United States .....                                                                      | 71 |
| eFigure 6F Predictor of insurance .....                                                                                               | 72 |
| <b>eFigure 7 Funnel plots with pseudo 95% confidence limits for opioid dose, current substance use disorder, age and sex</b> .....    | 73 |
| eFigure 7A Funnel plots for opioid dose, current substance use disorder, any mental health disorders and use of benzodiazepines ..... | 73 |
| eFigure 7B Funnel plots for age, sex and race .....                                                                                   | 74 |
| <b>Section 1 Search strategies</b> .....                                                                                              | 75 |
| MEDLINE.....                                                                                                                          | 75 |
| EMBASE.....                                                                                                                           | 76 |
| PsycInfo.....                                                                                                                         | 78 |
| CINAHL.....                                                                                                                           | 79 |
| Web of Science.....                                                                                                                   | 80 |
| <b>Section 2 Risk of bias assessment criteria</b> .....                                                                               | 82 |
| <b>Section 3 Excluded studies</b> .....                                                                                               | 83 |
| Excluded studies for conference abstracts: n=29 .....                                                                                 | 83 |
| Excluded studies for non-observational studies: n=4.....                                                                              | 84 |
| Excluded studies for unclear or non-chronic pain conditions: n=58.....                                                                | 84 |
| Excluded studies for unclear or non-prescriptions of opioids: n=38.....                                                               | 87 |
| Excluded studies without outcome of interest (fatal or non-fatal overdose): n=35.....                                                 | 88 |
| Excluded studies without adjusted analysis: n=18 .....                                                                                | 90 |

|                                                                                              |           |
|----------------------------------------------------------------------------------------------|-----------|
| Excluded studies with significant postbaseline factors: n=2 .....                            | 91        |
| Excluded studies with patients exclusively having prior opioid overdose: n=2:.....           | 91        |
| <b>Section 4 Credibility assessment of subgroup effects for substance use disorder</b> ..... | <b>92</b> |

**eTable 1 Summary of Previous Systematic Reviews exploring Predictors of Opioid Overdose**

| Systematic review        | No. of primary studies considered | Predictors of opioid overdose                                                                                                                                                                                                                                                                                                                                                                                                                                                                                                                                                                                                                                                                                                                                       |
|--------------------------|-----------------------------------|---------------------------------------------------------------------------------------------------------------------------------------------------------------------------------------------------------------------------------------------------------------------------------------------------------------------------------------------------------------------------------------------------------------------------------------------------------------------------------------------------------------------------------------------------------------------------------------------------------------------------------------------------------------------------------------------------------------------------------------------------------------------|
| Zullo AR, et al., 2020   | 3 studies                         | <p><b><u>Strong associations</u></b></p> <ul style="list-style-type: none"> <li>• age (direction not reported)</li> <li>• disability status</li> <li>• opioid amount</li> <li>• substance misuse</li> <li>• long-term opioid use</li> <li>• opioid misuse</li> <li>• number of prescribers</li> <li>• number of pharmacies</li> </ul> <p><b><u>Weak associations</u></b></p> <ul style="list-style-type: none"> <li>• race (not defined),</li> <li>• comorbidities</li> <li>• mental health</li> <li>• low income</li> <li>• area-level percentage of unemployment</li> <li>• insurance status</li> <li>• opioid type (not defined)</li> <li>• nonpain treatments (antidepressants)</li> <li>• non-opioid substance misuse</li> <li>• benzodiazepine use</li> </ul> |
| Van Draanen et al., 2020 | 37 studies                        | <ul style="list-style-type: none"> <li>• criminal justice system involvement (11 of 13 studies*)</li> <li>• poverty (8 of 13 studies)</li> <li>• unemployment (2 of 11 studies)</li> <li>• low social support (6 of 9 studies)</li> <li>• health insurance status (6 of 8 studies)</li> <li>• homelessness and housing status (4 of 8 studies)</li> <li>• lower level of education (6 of 8 studies)</li> <li>• lower socioeconomic status (5 of 6 studies)</li> </ul>                                                                                                                                                                                                                                                                                               |
| Adewumi et al., 2018     | 10 studies                        | <ul style="list-style-type: none"> <li>• larger doses of opioids:               <ul style="list-style-type: none"> <li>(1) <math>\leq 20</math> versus <math>\geq 21</math> MME/day: RR 2.81, 95% CI 1.09-7.22</li> <li>(2) <math>\leq 50</math> versus <math>&gt; 50</math> MME/day: RR 3.87, 95% CI 2.36-6.33</li> <li>(3) <math>\leq 100</math> versus <math>&gt; 100</math> MME/day: RR 4.28, 95% CI 2.61-7.1</li> <li>(4) <math>\leq 50</math> versus <math>&gt; 50-100</math> MME/day: RR 3.09, 95% CI 1.84-5.18</li> </ul> </li> </ul>                                                                                                                                                                                                                       |
| Elzey et al., 2016       | 24 studies                        | <ul style="list-style-type: none"> <li>• higher dose of opioids</li> <li>• specific opioid medications (i.e., oxycodone, hydrocodone, methadone)</li> <li>• cocaine and heroin use</li> <li>• co-prescription with benzodiazepines</li> <li>• alcohol consumption</li> <li>• non-medical use of prescription opioids</li> <li>• history of prescription opioid overdose</li> <li>• a lifetime suicide attempt</li> </ul>                                                                                                                                                                                                                                                                                                                                            |

| Systematic review        | No. of primary studies considered | Predictors of opioid overdose                                                                                                                                                                                                                                                                                                                                                                                                                                                                                                                                                                                                                                                                                                                                                                                                                                                                                                                                                                                                                                                  |
|--------------------------|-----------------------------------|--------------------------------------------------------------------------------------------------------------------------------------------------------------------------------------------------------------------------------------------------------------------------------------------------------------------------------------------------------------------------------------------------------------------------------------------------------------------------------------------------------------------------------------------------------------------------------------------------------------------------------------------------------------------------------------------------------------------------------------------------------------------------------------------------------------------------------------------------------------------------------------------------------------------------------------------------------------------------------------------------------------------------------------------------------------------------------|
|                          |                                   | <ul style="list-style-type: none"> <li>• middle age (40-49 years)</li> <li>• lack of a high school education</li> <li>• recent prescription for sedative-hypnotics</li> <li>• living in a rural area</li> <li>• poverty</li> <li>• bipolar disorder in women</li> <li>• depressive disorder</li> </ul>                                                                                                                                                                                                                                                                                                                                                                                                                                                                                                                                                                                                                                                                                                                                                                         |
| King et al., 2014        | 47 studies                        | <ul style="list-style-type: none"> <li>• high-volume prescribing</li> <li>• opioid prescription or sales</li> <li>• opioid dosage</li> <li>• prescription of oxycodone</li> <li>• prescription of methadone</li> <li>• history of substance abuse</li> <li>• diversion</li> <li>• doctor or pharmacy shopping</li> <li>• drug substitution</li> <li>• polydrug toxicity (e.g., benzodiazepines and other sedatives---hypnotics, antidepressants, and sleep aids, alcohol, or illicit drugs)</li> <li>• sociodemographic characteristics (e.g., men, non-Hispanic Whites and American Indian/Alaska Natives, middle-aged individuals, those living in rural areas, and those of lower SES)</li> <li>• area urbanization or socioeconomic status</li> <li>• geography</li> <li>• guidelines, policies, and consensus statements supportive of opioids for chronic pain</li> <li>• interventions (i.e., co-prescription of naloxone, Prescription Pain Medication Program)</li> <li>• media coverage</li> <li>• prescription drug monitoring programs (1 of 2 studies)</li> </ul> |
| van Draanen et al., 2021 | 38 studies                        | <ul style="list-style-type: none"> <li>• mood disorders</li> <li>• anxiety disorders</li> <li>• thought disorders (e.g., schizophrenia, bipolar disorder)</li> <li>• any mental disorder</li> </ul>                                                                                                                                                                                                                                                                                                                                                                                                                                                                                                                                                                                                                                                                                                                                                                                                                                                                            |

\* The number of studies supporting the association (e.g., 11 of 13 studies exploring criminal system involvement found a positive association with opioid overdose)

**eTable 2 Baseline characteristics of 28 eligible studies and 7 studies with overlapped population**

| Study                                           | Study design       | Country | Sample size   | Age, mean $\pm$ SD* | Female n(%)   | Chronic pain conditions                | Benzo-diazepine co-prescription n(%) | Substance use disorder n(%)                           | Mental health disorder n(%)                                                                                                          |
|-------------------------------------------------|--------------------|---------|---------------|---------------------|---------------|----------------------------------------|--------------------------------------|-------------------------------------------------------|--------------------------------------------------------------------------------------------------------------------------------------|
| <b>28 eligible studies for primary analysis</b> |                    |         |               |                     |               |                                        |                                      |                                                       |                                                                                                                                      |
| <b>Hartung, 2007</b>                            | Cohort study       | USA     | <b>5684</b>   | 52.5 $\pm$ 16       | 1354 (23.8%)  | Mixed CNCP and cancer                  | NR                                   | SUD 186 (3.3%)                                        | NR                                                                                                                                   |
| <b>Dunn, 2010</b>                               | Cohort study       | USA     | <b>9940</b>   | 54 $\pm$ 16.8       | 5924 (59.6%)  | CNCP                                   | NR                                   | SUD 616 (6.2%)                                        | Depression diagnosis 2674 (26.9%)                                                                                                    |
| <b>Bohnert, 2011</b> #†                         | Case-control study | USA     | <b>155434</b> | $\geq$ 18           | 10430 (6.7%)  | Mixed CNCP and cancer                  | NR                                   | SUD 15491 (10%)                                       | Psychiatric disorder 52427 (33.7%)                                                                                                   |
| <b>Gwira Baublatt, 2014</b>                     | Case-control study | USA     | <b>12432</b>  | 43 $\pm$ 12.3       | NR            | CNCP                                   | NR                                   | NR                                                    | NR                                                                                                                                   |
| <b>Zedler, 2014</b>                             | Case-control study | USA     | <b>8987</b>   | 62 $\pm$ 11.5       | 706 (7.9%)    | Mixed CNCP and cancer (12% acute pain) | 1578 (17.6%)                         | SUD 1181 (13.1%); TUD 1567 (17.4%)                    | PTSD 1340 (14.9%); Anxiety disorder 861 (9.6%); Bipolar disorder 325 (3.6%); Schizophrenia 150 (1.7%); ADHD 65 (0.7%); OCD 24 (0.3%) |
| <b>Kaplovich, 2015</b>                          | Cohort study       | Canada  | <b>32449</b>  | 45 $\pm$ 8.2        | 18809 (58%)   | CNCP                                   | 8365 (25.8%)                         | AUD 3505 (10.8%)                                      | SSRIs/SNRIs 7123 (22.0%); other antidepressants 4656 (14.3%)                                                                         |
| <b>Miller, 2015</b>                             | Cohort study       | USA     | <b>820616</b> | 60 $\pm$ 14.8       | 52177 (6.5%)  | CNCP                                   | 98814 (12%)                          | AUD 69241 (8.6%); Drug-related disorders 42210 (5.1%) | Depression 174049 (21.2%)                                                                                                            |
| <b>Ray, 2015</b>                                | Cohort study       | USA     | <b>38756</b>  | 48 $\pm$ 3          | 22434 (57.9%) | CNCP (1.5% acute pain)                 | 24619 (63.5%)                        | AUD 764 (1.97%); Drug abuse was excluded              | Heterocyclic antidepressant 10184 (26.3%); SSRI or other antidepressant 24865 (64.2%);                                               |

| Study                           | Study design       | Country       | Sample size   | Age, mean $\pm$ SD* | Female n(%)    | Chronic pain conditions                  | Benzo-diazepine co-prescription n(%) | Substance use disorder n(%)                                  | Mental health disorder n(%)                                                                                                                           |
|---------------------------------|--------------------|---------------|---------------|---------------------|----------------|------------------------------------------|--------------------------------------|--------------------------------------------------------------|-------------------------------------------------------------------------------------------------------------------------------------------------------|
|                                 |                    |               |               |                     |                |                                          |                                      |                                                              | Antipsychotic 6328 (16.3%)                                                                                                                            |
| <b>Turner, 2015</b>             | Cohort study       | <b>USA</b>    | <b>206869</b> | 44.1 $\pm$ 12       | 117472 (56.8%) | CNCP                                     | 40802 (19.7%)                        | Alcohol abuse 4637 (2.2%); Other substance abuse 4420 (2.1%) | Anxiety or posttraumatic stress disorder 30887 (14.9); Depression 26,223 (12.7); Psychosis 5,603 (2.7)                                                |
| <b>Garg, 2017</b>               | Cohort study       | <b>USA</b>    | <b>150821</b> | 18 to 64            | 102134 (67.7%) | CNCP                                     | 38069 (25.2%)                        | OD 6354 (4.3%)                                               | NR                                                                                                                                                    |
| <b>Carey, 2018</b>              | Cohort study       | <b>USA</b>    | <b>627391</b> | $\geq$ 18           | NR             | CNCP (including acute pain) <sup>¶</sup> | NR                                   | NR                                                           | NR                                                                                                                                                    |
| <b>Chung, 2018</b>              | Cohort study       | <b>USA</b>    | <b>50658</b>  | 48.3 $\pm$ 10.1     | 30094 (59.4%)  | CNCP (2.6% acute pain)                   | 19939 (39.4%)                        | Patients with SUD were excluded                              | SSRI or other antidepressant 16168 (31.9%)                                                                                                            |
| <b>Glanz, 2018</b> <sup>†</sup> | Cohort study       | <b>USA</b>    | <b>53536</b>  | 53.6 $\pm$ 17.0     | 30815 (57.6%)  | CNCP (16.8% no chronic pain)             | NR                                   | SUD 2711 (6.3%); TUD 9937 (23.2%)                            | Mental health disorder 17778 (33.2%); Psychotropic prescription 27357 (51.1%)                                                                         |
| <b>Gomes, 2018</b> <sup>#</sup> | Case-control study | <b>Canada</b> | <b>6514</b>   | 48.78 $\pm$ 8.89    | 2892 (44.4%)   | CNCP (including acute pain) <sup>¶</sup> | 3808 (58.5%)                         | AUD 1376 (21.1%);                                            | SSRIs 2370 (36.4%), other antidepressants 2681 (41.2%), other psychotropic drugs/CNS depressants 1714 (26.3%)                                         |
| <b>Nadpara, 2018</b>            | Case-control study | <b>USA</b>    | <b>27179</b>  | 51 $\pm$ 14.8       | 20910 (57.8%)  | Mixed CNCP and cancer                    | 10098 (27.9%)                        | SUD 3672 (10.2%); TUD 4539 (12.6%)                           | Anxiety 6153 (17%); Depression 6007 (16.6%); Bipolar disorder 1298 (3.6%); ADHD 814 (2.3%); PTSD 426 (1.2%); Schizophrenia 132 (0.4%); OCD 138 (0.4%) |

| Study                 | Study design       | Country       | Sample size     | Age, mean $\pm$ SD* | Female n(%)      | Chronic pain conditions                     | Benzo-diazepine co-prescription n(%) | Substance use disorder n(%)                                         | Mental health disorder n(%)                                                                                         |
|-----------------------|--------------------|---------------|-----------------|---------------------|------------------|---------------------------------------------|--------------------------------------|---------------------------------------------------------------------|---------------------------------------------------------------------------------------------------------------------|
| <b>Bedson, 2019</b>   | Cohort study       | <b>UK</b>     | <b>98140</b>    | 61 $\pm$ 19.3       | 57937 (59%)      | CNCP                                        | NR                                   | NR                                                                  | Depression consultation 6615 (6.7%)                                                                                 |
| <b>Glanz, 2019</b>    | Case-control study | <b>USA</b>    | <b>14898</b>    | 56.3 $\pm$ 16       | 8988 (60.3%)     | CNCP                                        | 5468 (36.7%)                         | Drug or alcohol use disorder 4816 (32.3%)                           | Mental health disorder 10885 (73.1%)                                                                                |
| <b>James, 2019</b>    | Cohort study       | <b>USA</b>    | <b>572</b>      | 54.9 $\pm$ 10.1     | 261 (45.6%)      | Mixed CNCP and cancer                       | 7 (1.2%)                             | AUD 110 (19.2%); History of other SUD 197 (34.4%)                   | Mental health disorders 420 (73.4%)                                                                                 |
| <b>Young, 2019</b>    | Cohort study       | <b>USA</b>    | <b>372038</b>   | 53.5 $\pm$ 13.8     | 200770 (54%)     | Mixed CNCP and cancer (13% no chronic pain) | 158282 (43%)                         | Drug dependence 55420 (15%); Alcohol 7511 (2%); Tobacco 50359 (14%) | Depression 83087 (22%)                                                                                              |
| <b>El-Akkad, 2020</b> | Cohort study       | <b>Canada</b> | <b>9272</b>     | 38 $\pm$ 10.4       | 1676 (18.1%)     | CNCP                                        | 283 (3.1%)                           | SUD 1365 (14.7%)                                                    | NR                                                                                                                  |
| <b>Fonda, 2020</b>    | Cohort study       | <b>USA</b>    | <b>49014</b>    | 29.6 $\pm$ 4.93     | 7741 (15.8%)     | CNCP                                        | NR                                   | SUD 4064 (8.3%); Alcohol (6.16%); other (4.15%)                     | Depression 10208 (20.82%); PTSD (28.44%); Anxiety (11.72%)                                                          |
| <b>Li, 2020</b>       | Cohort study       | <b>USA</b>    | <b>19678250</b> | 40.1 $\pm$ 13.38    | 10690039 (54.3%) | CNCP                                        | 2345456 (11.9%)                      | SUD was excluded                                                    | Depression 1168964 (5.9%); Anxiety or PTSD 1007276 (5.1%); Bipolar disorder 203460 (1%); Schizophrenia 28587 (0.1%) |
| <b>Qeadan, 2021</b> † | Cohort study       | <b>USA</b>    | <b>869097</b>   | 51.95 $\pm$ 18.31   | 510331 (58.7%)   | CNCP                                        | NR                                   | SUD excluding OUD 51819 (5.96%); OUD 19268 (2.22%)                  | Mental health disorder 270961 (31.18%)                                                                              |
| <b>Salkar, 2021</b>   | Case-control study | <b>USA</b>    | <b>266</b>      | 76.27 $\pm$ 7.55    | 95 (71.4%)       | CNCP                                        | 55 (20.7%)                           | SUD 6 (2.3%); Hypnotic medication                                   | Mental health disorder 151 (56.8%)                                                                                  |



| Study                                       | Study design | Country | Sample size | Age, mean $\pm$ SD* | Female n(%)   | Chronic pain conditions                       | Benzo-diazepine co-prescription n(%) | Substance use disorder n(%)                                                                                   | Mental health disorder n(%)                                                                                                                                                                                                                             |
|---------------------------------------------|--------------|---------|-------------|---------------------|---------------|-----------------------------------------------|--------------------------------------|---------------------------------------------------------------------------------------------------------------|---------------------------------------------------------------------------------------------------------------------------------------------------------------------------------------------------------------------------------------------------------|
|                                             |              |         |             |                     |               |                                               |                                      | dependence 7 (2.6%)                                                                                           |                                                                                                                                                                                                                                                         |
| <b>DiPrete, 2022</b>                        | Cohort study | USA     | 19443       | 49 $\pm$ 10.4       | 13980 (71.9%) | Mixed CNCP and cancer pain (10.9% acute pain) | 7873 (40.5%)                         | SUD 1782 (9.2%)                                                                                               | Depression 6399 (32.9%), Anxiety 6427 (33.1%), PTSD 420 (2.2%)                                                                                                                                                                                          |
| <b>Hayes, 2022a #</b>                       | Cohort study | USA     | 405631      | 57.3 $\pm$ 14.4     | 32931 (8.1)   | CNCP                                          | 71325 (17.58%)                       | Any SUD 53717 (13.24%): including OUD 4016 (0.99%), DUD 24888 (6.14%), AUD 40001 (9.86%), TUD 49256 (12.14%), | Any Mental health conditions 223884 (55.2%): including Anxiety 14361 (3.54%), Bipolar disorder 2625 (0.65%), Major depressive disorder 34312 (8.46%), PTSD 18113 (4.47%), Schizophrenia 1632 (0.40%), Multiple mental health conditions 103585 (25.54%) |
| <b>Larochelle, 2022 #</b>                   | Cohort study | USA     | 199836      | 56.9 $\pm$ 12.4     | 109659 (54.9) | CNCP                                          | 69470 (34.8%)                        | OD (medication for OD, opioid overdose, detoxification) was excluded                                          | Depression 39280 (19.7%); Anxiety 36052 (18.0%); ADHD 3590 (1.8%); PTSD 3126 (1.6%); Bipolar disorder 4218 (2.1%); Psychosis 2057 (1.0%)                                                                                                                |
| <b>Lo-Ciganic, 2022</b>                     | Cohort study | USA     | 37879       | 59.3% $\geq$ 65yr   | 27235 (71.9)  | CNCP                                          | 12311 (32.5%)                        | Opioid use disorder 379 (1%), DUD 568 (1.5%), AUD 492 (1.3%);                                                 | Anxiety 7159 (18.9%), Mood disorders 6970 (18.4%), Sleep disorders 18864 (33.9%)                                                                                                                                                                        |
| <b>7 studies with overlapped population</b> |              |         |             |                     |               |                                               |                                      |                                                                                                               |                                                                                                                                                                                                                                                         |

| Study                            | Study design       | Country       | Sample size   | Age, mean $\pm$ SD* | Female n(%)   | Chronic pain conditions                  | Benzo-diazepine co-prescription n(%) | Substance use disorder n(%)                                                   | Mental health disorder n(%)                                                                                                              |
|----------------------------------|--------------------|---------------|---------------|---------------------|---------------|------------------------------------------|--------------------------------------|-------------------------------------------------------------------------------|------------------------------------------------------------------------------------------------------------------------------------------|
| <b>Gomes, 2011</b> <sup>#</sup>  | Case-control study | <b>Canada</b> | <b>2212</b>   | 44.67 $\pm$ 8.21    | 1287 (58.2)   | CNCP                                     | 531 (24%)                            | History of AUD 592 (26.8%)                                                    | SSRIs 910 (41.1%); other antidepressants 926 (41.9%)                                                                                     |
| <b>Ilgen, 2016</b> <sup>#</sup>  | Case-control study | <b>USA</b>    | <b>123946</b> | $\geq$ 18           | 8994 (7.3)    | Mixed CNCP and cancer                    | NR                                   | SUD 12765 (10.3%)                                                             | Depression; bipolar; mood NOS 33852 (27.3%); Other anxiety 11505 (9.3%); PTSD 15721 (12.7%); Psychotic disorders 4588 (3.7%)             |
| <b>Gomes, 2017</b> <sup>#</sup>  | Case-control study | <b>Canada</b> | <b>5875</b>   | 47.74 $\pm$ 9.92    | 2540 (43.2)   | CNCP (including acute pain) <sup>†</sup> | 3575 (60.9%)                         | History of AUD 1401 (23.8%);                                                  | Anxiety/sleep disorders 4806 (81.8%); Affective disorder 1158 (19.7%), psychoses 752 (12.8%); Other mental health diagnosis 4193 (71.4%) |
| <b>Hayes, 2020</b> <sup>#</sup>  | Cohort study       | <b>USA</b>    | <b>53187</b>  | 57.18 $\pm$ 12.98   | 5130 (9.6%)   | CNCP                                     | 38087 (71.6%)                        | SUD 4633 (8.7%); including OUD 903 (1.7%), DUD 2544 (4.8%), AUD 2495 (4.7%)   | Any Mental Health Conditions 27614 (51.9%)                                                                                               |
| <b>Agnoli, 2021</b> <sup>#</sup> | Cohort study       | <b>USA</b>    | <b>113618</b> | 58.1                | 60772 (53.5%) | CNCP (including acute pain) <sup>†</sup> | 31821 (28%)                          | Drug use disorder 16356 (14.4%); AUD 2807 (2.5%)                              | Depression/anxiety 60605 (53.3%)                                                                                                         |
| <b>Hayes, 2021</b> <sup>#</sup>  | Cohort study       | <b>USA</b>    | <b>151462</b> | 56.38 $\pm$ 13.36   | 13046 (8.6%)  | CNCP                                     | 38148 (25.2%)                        | SUD 10522 (7.8%); including OUD 1983 (1.4%), DUD 5755 (4.2%), AUD 5768 (4.3%) | Any Mental Health Condition 79796 (52.7%)                                                                                                |

| Study                     | Study design | Country | Sample size | Age, mean $\pm$ SD* | Female n(%)   | Chronic pain conditions | Benzo-diazepine co-prescription n(%) | Substance use disorder n(%)                                                  | Mental health disorder n(%)               |
|---------------------------|--------------|---------|-------------|---------------------|---------------|-------------------------|--------------------------------------|------------------------------------------------------------------------------|-------------------------------------------|
| Hayes, 2022b <sup>#</sup> | Cohort study | USA     | 99111       | 58.07 $\pm$ 13.35   | 10156 (10.2%) | CNCP                    | 26535 (26.8%)                        | SUD 8090 (8.2%); including OUD 1403 (1.4%), DUD 4449 (4.5%), AUD 4489 (4.5%) | Any Mental Health Condition 51104 (51.6%) |

ADHD: attention deficit hyperactivity disorder, AUD: alcohol use disorder, CNCP: chronic noncancer pain, DUD: Non-Opioid Drug Use Disorder, NR: not reported, OCD: Obsessive-compulsive disorder, OUD: opioid use disorder, PTSD: Post-traumatic stress disorder, SD: standard deviation, SNRIs: serotonin and norepinephrine reuptake inhibitors, SSRIs: selective serotonin reuptake inhibitors, SUD: substance use disorder, TUD: tobacco use disorder, UK: United Kingdom, USA: United States of America

\*If age was reported as median and interquartile range or range, mean and SD of age were estimated.

<sup>¶</sup> Patients with acute pain were included; however, the proportion was not reported.

<sup>#</sup> Studies with  $\geq$ 50% overlapped study populations, the largest studies with longest follow-up were chosen as primary analysis

- Bohnert 2011 reported unintentional opioid overdose as primary analysis; Ilgen 2016 reported intentional opioid overdose for subgroup analysis of intentional vs unintentional overdose only
- Gomes 2011, 2017 and 2018: Gomes 2018 with largest sample size for primary analysis
- Larochelle 2022 and Agnoli 2021: Larochelle 2022 with largest sample size for primary analysis
- Hayes, 2020, 2021, 2022 a and b: Hayes 2022 a with largest sample size for primary analysis

<sup>†</sup> Studies reported regression models among two subpopulations in the same article

- Bohnert 2011: chronic cancer-related pain and chronic non-cancer pain
- Glanz 2018: two data sets: derivation and validation sets
- Qeadan 2021: chronic pain syndrome or low back pain

**eTable 3 Risk of bias assessment of 28 eligible studies and 7 studies with overlapped population**

| Study                                           | Representativeness of study population | Overdose type | Intentional or unintentional overdose | Valid outcome measure | Model appropriately adjusted | Proportion of loss to follow-up (%) | Model variables selected before the analysis | All variables reported in the final model | Industry-funded |
|-------------------------------------------------|----------------------------------------|---------------|---------------------------------------|-----------------------|------------------------------|-------------------------------------|----------------------------------------------|-------------------------------------------|-----------------|
| <b>28 eligible studies for primary analysis</b> |                                        |               |                                       |                       |                              |                                     |                                              |                                           |                 |
| <b>Hartung, 2007</b>                            | Yes                                    | Non-fatal     | Mixed                                 | No                    | No                           | NR                                  | No                                           | No                                        | NR              |
| <b>Dunn, 2010</b>                               | Yes                                    | Mixed         | Mixed                                 | No                    | Yes                          | NR                                  | Yes                                          | Yes                                       | No              |
| <b>Bohnert, 2011 # †</b>                        | No, Veterans                           | Fatal         | Unintentional                         | Yes                   | Yes                          | NR                                  | Yes                                          | Yes                                       | No              |
| <b>Gwira Baumblatt, 2014</b>                    | Yes                                    | Fatal         | Unintentional                         | Yes                   | No                           | NR                                  | Yes                                          | Yes                                       | NR              |
| <b>Zedler, 2014</b>                             | No, Veterans                           | Non-fatal     | Unintentional                         | No                    | Yes                          | 0.2                                 | Yes                                          | Yes                                       | Yes             |
| <b>Kaplovich, 2015</b>                          | Yes                                    | Fatal         | Mixed                                 | Yes                   | Yes                          | NR                                  | No                                           | No                                        | Yes             |
| <b>Miller, 2015</b>                             | No, Veterans                           | Non-fatal     | Unintentional                         | No                    | Yes                          | 2.4                                 | Yes                                          | No                                        | No              |
| <b>Ray, 2015</b>                                | No, Mental illness>60%                 | Fatal         | Mixed                                 | No                    | Yes                          | NR                                  | Yes                                          | NA                                        | No              |
| <b>Turner, 2015</b>                             | Yes                                    | Non-fatal     | Mixed                                 | No                    | Yes                          | NR                                  | Yes                                          | Yes                                       | No              |
| <b>Garg, 2017</b>                               | Yes                                    | Fatal         | Unintentional                         | Yes                   | No                           | NR                                  | Yes                                          | Yes                                       | No              |
| <b>Carey, 2018</b>                              | No, Disabled>50%                       | Non-fatal     | Mixed                                 | Yes                   | No                           | NR                                  | Yes                                          | Yes                                       | No              |
| <b>Chung, 2018</b>                              | Yes                                    | Fatal         | Unintentional                         | Yes                   | Yes                          | NR                                  | Yes                                          | No                                        | No              |
| <b>Glanz, 2018 †</b>                            | Yes                                    | Mixed         | Mixed                                 | No                    | Yes                          | NR                                  | No                                           | No                                        | No              |
| <b>Gomes, 2018 #</b>                            | Yes                                    | Fatal         | Unintentional                         | Yes                   | No                           | NR                                  | Yes                                          | Yes                                       | No              |
| <b>Nadpara, 2018</b>                            | Yes                                    | Non-fatal     | Unintentional                         | Yes                   | Yes                          | NR                                  | Yes                                          | Yes                                       | Yes             |
| <b>Bedson, 2019</b>                             | Yes                                    | Non-fatal     | Intentional                           | Yes                   | No                           | NR                                  | Yes                                          | Yes                                       | No              |
| <b>Glanz, 2019</b>                              | No, Mental illness>70%                 | Mixed         | Unintentional                         | No                    | Yes                          | NR                                  | Yes                                          | Yes                                       | No              |
| <b>James, 2019</b>                              | No, Mental illness>60%                 | Fatal         | Mixed                                 | No                    | No                           | NR                                  | Yes                                          | No                                        | No              |
| <b>Young, 2019</b>                              | No, High-dose opioid (≥90 mg/daily)    | Non-fatal     | Unintentional                         | No                    | Yes                          | NR                                  | Yes                                          | Yes                                       | Yes             |
| <b>El-Akkad, 2020</b>                           | Yes                                    | Fatal         | Mixed                                 | No                    | No                           | 14                                  | Yes                                          | Yes                                       | No              |
| <b>Fonda, 2020</b>                              | No, Veterans                           | Non-fatal     | Mixed                                 | Yes                   | No                           | NR                                  | Yes                                          | Yes                                       | No              |
| <b>Li, 2020</b>                                 | Yes                                    | Non-fatal     | Unintentional                         | No                    | Yes                          | NR                                  | Yes                                          | Yes                                       | No              |
| <b>Qeadan, 2021 †</b>                           | Yes                                    | Non-fatal     | Unintentional                         | No                    | Yes                          | NR                                  | Yes                                          | Yes                                       | No              |
| <b>Salkar, 2021</b>                             | No, Elderly(≥65yr)                     | Mixed         | Mixed                                 | Yes                   | No                           | NR                                  | Yes                                          | Yes                                       | No              |

| Study                                       | Representativeness of study population     | Overdose type | Intentional or unintentional overdose | Valid outcome measure | Model appropriately adjusted | Proportion of loss to follow-up (%) | Model variables selected before the analysis | All variables reported in the final model | Industry-funded |
|---------------------------------------------|--------------------------------------------|---------------|---------------------------------------|-----------------------|------------------------------|-------------------------------------|----------------------------------------------|-------------------------------------------|-----------------|
| <b>DiPrete, 2022</b>                        | No, High-dose opioid ( $\geq 90$ mg/daily) | Mixed         | Unintentional                         | No                    | Yes                          | NR                                  | Yes                                          | Yes                                       | No              |
| <b>Hayes, 2022a</b> #                       | No, Veterans                               | Non-fatal     | Unintentional                         | No                    | No                           | NR                                  | Yes                                          | Yes                                       | No              |
| <b>Larochelle, 2022</b> #                   | No, High-dose opioid ( $\geq 50$ mg/daily) | Mixed         | Mixed                                 | No                    | Yes                          | NR                                  | Yes                                          | Yes                                       | No              |
| <b>Hartung, 2007</b>                        | Yes                                        | Non-fatal     | Mixed                                 | No                    | Yes                          | NR                                  | Yes                                          | Yes                                       | No              |
| <b>7 studies with overlapped population</b> |                                            |               |                                       |                       |                              |                                     |                                              |                                           |                 |
| <b>Gomes, 2011</b> #                        | Yes                                        | Fatal         | Mixed                                 | Yes                   | No                           | NR                                  | Yes                                          | Yes                                       | Yes             |
| <b>Ilgen, 2016</b> #                        | No, Veterans                               | Fatal         | Intentional                           | Yes                   | Yes                          | NR                                  | Yes                                          | No                                        | No              |
| <b>Gomes, 2017</b> #                        | No, Mental illness >80%                    | Fatal         | Unintentional                         | Yes                   | No                           | NR                                  | Yes                                          | Yes                                       | No              |
| <b>Hayes, 2020</b> #                        | No, Veterans                               | Non-fatal     | Unintentional                         | No                    | No                           | NR                                  | Yes                                          | Yes                                       | No              |
| <b>Agnoli, 2021</b> #                       | No, High-dose opioid ( $\geq 50$ mg/daily) | Mixed         | Unintentional                         | No                    | Yes                          | NR                                  | Yes                                          | Yes                                       | No              |
| <b>Hayes, 2021</b> #                        | No, Veterans                               | Non-fatal     | Unintentional                         | No                    | No                           | NR                                  | Yes                                          | Yes                                       | No              |
| <b>Hayes, 2022b</b> #                       | No, Veterans                               | Non-fatal     | Unintentional                         | No                    | No                           | NR                                  | Yes                                          | Yes                                       | No              |

NR: not reported, NA: not applicable (due to use of propensity score matching)

# Studies with  $\geq 50\%$  overlapped study populations, the largest studies with longest follow-up were chosen as primary analysis

- Bohnert 2011 reported unintentional opioid overdose as primary analysis; Ilgen 2016 reported intentional opioid overdose for subgroup analysis of intentional vs unintentional overdose only
- Gomes 2011, 2017 and 2018: Gomes 2018 with largest sample size for primary analysis
- Larochelle 2022 and Agnoli 2021: Larochelle 2022 with largest sample size for primary analysis
- Hayes, 2020, 2021, 2022 a and b: Hayes 2022 a with largest sample size for primary analysis

† Studies reported regression models among two subpopulations in the same article

- Bohnert 2011: chronic cancer-related pain and chronic non-cancer pain
- Glanz 2018: two data sets: derivation and validation sets
- Qeadan 2021: chronic pain syndrome or low back pain

**eTable 4 GRADE evidence profile of prevalence of fatal or non-fatal overdose**

| Outcomes                  | Study characteristics |                 | Quality assessment |                              |              |                         |                     | Summary of Findings                       | Overall quality of evidence |
|---------------------------|-----------------------|-----------------|--------------------|------------------------------|--------------|-------------------------|---------------------|-------------------------------------------|-----------------------------|
|                           | No. of Studies        | No. of Patients | Risk of bias       | Inconsistency                | Indirectness | Imprecision             | Small study effects | prevalence of overdose (95% CI), per 1000 |                             |
| <b>Fatal overdose</b>     | 10                    | 1,199,105       | No <sup>†</sup>    | No<br>Tau <sup>2</sup> <0.01 | No           | <b>Yes</b> <sup>‡</sup> | Undetected          | 1.3 (0.6 to 2.3)                          | <b>Moderate</b>             |
| <b>Non-fatal overdose</b> | 17                    | 23,094,194      | No <sup>†</sup>    | No<br>Tau <sup>2</sup> <0.01 | No           | <b>Yes</b> <sup>‡</sup> | Undetected          | 3.2 (2.0 to 4.7)                          | <b>Moderate</b>             |

95% CI: 95% confidence interval

<sup>†</sup> We did not rate down for risk of bias as subgroup analysis showed no significant difference in low vs. high risk of bias on a component-by-component basis (subgroup analysis results are available upon request).

<sup>‡</sup> We rated down for imprecision as the 95%CI included the thresholds of 2‰ for fatal overdose and 4‰ for non-fatal overdose

**eTable 5 Dose-response relationship between opioid dose and fatal/nonfatal overdose**

| Dose (mg on MED) | Adjusted OR (95%CI) | Risk of fatal overdose (95%CI) *, per 1000 | Risk of non-fatal overdose (95%CI) *, per 1000 |
|------------------|---------------------|--------------------------------------------|------------------------------------------------|
| 10               | 1.11 (1.08-1.14)    | 1.1 (1.1-1.1)                              | 2.2 (2.2-2.3)                                  |
| 50               | 1.70 (1.48-1.96)    | 1.7 (1.5-2)                                | 3.4 (3-3.9)                                    |
| 90               | 2.56 (1.94-3.38)    | 2.6 (1.9-3.4)                              | 5.1 (3.9-6.8)                                  |
| 100              | 2.84 (2.08-3.87)    | 2.8 (2.1-3.9)                              | 5.7 (4.2-7.7)                                  |
| 150              | 4.95 (3.26-7.51)    | 5 (3.3-7.5)                                | 9.9 (6.5-15)                                   |
| 200              | 8.06 (4.34-14.99)   | 8.1 (4.3-15)                               | 16.1 (8.7-30)                                  |
| 250              | 14.36 (7.16-28.82)  | 14.4 (7.2-28.8)                            | 28.7 (14.3-57.6)                               |

MED: morphine equivalent dose, OR: odds ratio, 95%CI: 95% confidence interval

\* We estimated the absolute risk of fatal or non-fatal overdose for each dose using a baseline risk of 1% for fatal overdose or 2% for non-fatal overdose and the adjusted OR

eTable 6 GRADE evidence profile of opioid prescribing factors associated with opioid overdose

| Predictors                                                                    | Study characteristics |                 | Quality assessment      |               |                         |                         |                           | Summary of Findings  |                                            |                                                | Overall quality of evidence |
|-------------------------------------------------------------------------------|-----------------------|-----------------|-------------------------|---------------|-------------------------|-------------------------|---------------------------|----------------------|--------------------------------------------|------------------------------------------------|-----------------------------|
|                                                                               | No. of Studies        | No. of Patients | Risk of bias            | Inconsistency | Indirectness            | Imprecision             | Small study effects       | Adjusted OR (95% CI) | Risk of fatal overdose (95%CI) *, per 1000 | Risk of non-fatal overdose (95%CI) *, per 1000 |                             |
| <b>Dose (50-mg increment)</b>                                                 | 14                    | 1,315,173       | No <sup>†</sup>         | No            | No                      | No                      | Undetected Egger's p=0.23 | 1.69 (1.50 to 1.90)  | 1.7 (1.5 to 1.9)                           | 3.4 (3 to 3.8)                                 | High                        |
| <b>Long- vs. short- acting opioids</b>                                        | 9                     | 978,745         | No <sup>†</sup>         | No            | No                      | <b>Yes</b> <sup>‡</sup> | NA                        | 1.92 (1.51 to 2.45)  | 1.9 (1.5 to 2.5)                           | 3.8 (3 to 4.9)                                 | Moderate                    |
| <b>Number of naloxone prescriptions (per each prescription increase)</b>      | 2                     | 869,097         | <b>Yes</b> <sup>#</sup> | No            | No                      | No                      | NA                        | 1.81 (1.71 to 1.93)  | 1.8 (1.7 to 1.9)                           | 3.6 (3.4 to 3.9)                               | Moderate                    |
| <b>As needed + regularly scheduled vs. regularly scheduled</b>                | 2                     | 148,562         | No                      | No            | <b>Yes</b> <sup>§</sup> | No                      | NA                        | 1.29 (1.07 to 1.55)  | 1.3 (1.1 to 1.6)                           | 2.6 (2.1 to 3.1)                               | Moderate                    |
| <b>Duration of opioid use (every 90-day increment from day 1)</b>             | 2                     | 153,033         | <b>Yes</b> <sup>#</sup> | No            | No                      | No                      | NA                        | 1.01 (1.003 to 1.03) | 1 (1 to 1)                                 | 2 (2 to 2.1)                                   | Moderate                    |
| <b>Route of administration: oral vs. non-oral (parenteral or transdermal)</b> | 2                     | 45,153          | No                      | No            | No                      | No                      | NA                        | 1.13 (0.88 to 1.46)  | 1.1 (0.9 to 1.5)                           | 2.3 (1.8 to 2.9)                               | High                        |
| <b>Long-acting methadone vs. long-acting morphine</b>                         | 2                     | 30,727          | <b>Yes</b> <sup>#</sup> | No            | No                      | <b>Yes</b> <sup>‡</sup> | NA                        | 2.25 (1.52 to 3.31)  | 2.3 (1.5 to 3.3)                           | 4.5 (3 to 6.6)                                 | Low                         |

OR: odds ratio, 95%CI: 95% confidence interval, NA: not applicable

\* We estimated the absolute risk of fatal or non-fatal overdose for each predictor using a baseline risk of 1‰ for fatal overdose or 2‰ for non-fatal overdose and the adjusted OR

<sup>†</sup> We did not rate down for risk of bias as subgroup analysis showed no significant difference in studies at low vs. high risk of bias on a component-by-component basis.

<sup>§</sup> We rated down for indirectness as the evidence was drawn indirectly from high-risk population (e.g., veterans, ≥60% study population with mental disorders, or use of high dose opioids)

<sup>#</sup> We rated down for risk of bias because of at least 20% of the total weight from studies with high-risk of bias.

<sup>‡</sup> We rated down for imprecision because the lower and upper limits of 95%CI associated with the adjusted OR included both large and small associations with opioid overdose (95%CI of adjusted OR included the threshold of large association of OR=2 or OR=0.5).



eTable 7 GRADE evidence profile of co-prescription factors associated with opioid overdose

| Predictors                                 | Study characteristics |                 | Quality assessment |                  |              |                  |                            | Summary of Findings  |                                            |                                                | Overall quality of evidence |
|--------------------------------------------|-----------------------|-----------------|--------------------|------------------|--------------|------------------|----------------------------|----------------------|--------------------------------------------|------------------------------------------------|-----------------------------|
|                                            | No. of Studies        | No. of Patients | Risk of bias       | Inconsistency    | Indirectness | Imprecision      | Small study effects        | Adjusted OR (95% CI) | Risk of fatal overdose (95%CI) *, per 1000 | Risk of non-fatal overdose (95%CI) *, per 1000 |                             |
| Co-prescription of benzodiazepines         | 12                    | 1,246,864       | No <sup>†</sup>    | No               | No           | Yes <sup>‡</sup> | Undetected; Egger's p=0.72 | 1.79 (1.46 to 2.19)  | 1.8 (1.5 to 2.2)                           | 3.6 (2.9 to 4.4)                               | Moderate                    |
| Co-prescription of anticonvulsants         | 3                     | 12,655          | Yes <sup>#</sup>   | No               | No           | No               | NA                         | 1.56 (1.30 to 1.88)  | 1.6 (1.3 to 1.9)                           | 3.1 (2.6 to 3.8)                               | Moderate                    |
| Co-prescription of sedatives and hypnotics | 6                     | 337,924         | No <sup>†</sup>    | No               | No           | No               | NA                         | 1.37 (1.2 to 1.56)   | 1.4 (1.2 to 1.6)                           | 2.7 (2.4 to 3.1)                               | High                        |
| Co-prescription of muscle relaxants        | 5                     | 19,776,855      | No <sup>†</sup>    | No               | No           | No               | NA                         | 1.28 (1.10 to 1.50)  | 1.3 (1.1 to 1.5)                           | 2.6 (2.2 to 3)                                 | High                        |
| Co-prescription of stimulants              | 2                     | 45,153          | No                 | No               | No           | No <sup>*</sup>  | NA                         | 1.06 (0.9 to 1.26)   | 1.1 (0.9 to 1.3)                           | 2.1 (1.8 to 2.5)                               | High                        |
| Use of non-opioid analgesics               | 3                     | 98,340          | Yes <sup>#</sup>   | Yes <sup>¶</sup> | No           | No <sup>*</sup>  | NA                         | 0.79 (0.58 to 1.09)  | 0.8 (0.6 to 1.1)                           | 1.6 (1.2 to 2.2)                               | Low                         |
| Co-prescription of NSAIDs                  | 3                     | 104,920         | Yes <sup>#</sup>   | Yes <sup>¶</sup> | No           | No <sup>*</sup>  | NA                         | 0.94 (0.78 to 1.14)  | 0.9 (0.9 to 1.1)                           | 1.9 (1.6 to 2.3)                               | Low                         |
| Co-prescription of warfarin                | 2                     | 45,153          | Yes <sup>#</sup>   | Yes <sup>¶</sup> | No           | No <sup>*</sup>  | NA                         | 0.96 (0.81 to 1.13)  | 1 (0.8 to 1.1)                             | 1.9 (1.6 to 2.3)                               | Low                         |
| Number of drugs                            | 3                     | 132,801         | Yes <sup>#</sup>   | No               | No           | No <sup>*</sup>  | NA                         | 0.99 (0.94 to 1.04)  | 1 (0.9 to 1)                               | 2 (1.9 to 2.1)                                 | Moderate                    |

OR: odds ratio, 95%CI: 95% confidence interval, NA: not applicable

\* We estimated the absolute risk of fatal or non-fatal overdose for each predictor using a baseline risk of 1‰ for fatal overdose or 2‰ for non-fatal overdose and the adjusted OR

# We rated down for risk of bias because of at least 20% of the total weight from studies with high-risk of bias.

† We did not rate down for risk of bias as subgroup analysis showed no significant difference in studies at low vs. high risk of bias on a component-by-component basis.

‡ We rated down for imprecision because the lower and upper limits of 95%CI associated with the adjusted OR included both large and small associations with opioid overdose (95%CI of adjusted OR included the threshold of large association of OR=2 or OR=0.5).

¶ Although the estimate of precision included no significant association, we did not rate down for imprecision because the 95%CI did not include important association (i.e., OR ≥2.0 or ≤0.5).

¶ We rated down for inconsistency because of large heterogeneity across studies.

eTable 8 GRADE evidence profile of psychological factors associated with opioid overdose

| Predictors                                                                        | Study characteristics |                 | Quality assessment |               |              |             |                     | Summary of Findings  |                                            |                                                | Overall quality of evidence |
|-----------------------------------------------------------------------------------|-----------------------|-----------------|--------------------|---------------|--------------|-------------|---------------------|----------------------|--------------------------------------------|------------------------------------------------|-----------------------------|
|                                                                                   | No. of Studies        | No. of Patients | Risk of bias       | Inconsistency | Indirectness | Imprecision | Small study effects | Adjusted OR (95% CI) | Risk of fatal overdose (95%CI) *, per 1000 | Risk of non-fatal overdose (95%CI) *, per 1000 |                             |
| <b>Psychotic disorders or use of antipsychotics</b>                               | 6                     | 410,629         | No †               | No            | No           | Yes ‡       | NA                  | 1.59 (1.16 to 2.19)  | 1.6 (1.2 to 2.2)                           | 3.2 (2.3 to 4.4)                               | Moderate                    |
| <b>Tobacco use or use disorder (including smoking &amp; tobacco use disorder)</b> | 7                     | 210,544         | No †               | No            | No           | No          | NA                  | 1.57 (1.37 to 1.81)  | 1.6 (1.4 to 1.8)                           | 3.1 (2.7 to 3.6)                               | High                        |
| <b>History of substance use disorder</b>                                          | 4                     | 46,628          | No †               | No            | No           | Yes ‡       | NA                  | 1.47 (1.03 to 2.09)  | 1.5 (1 to 2.1)                             | 2.9 (2.1 to 4.2)                               | Moderate                    |
| <b>Anxiety</b>                                                                    | 5                     | 271,300         | No †               | No            | Yes §        | No          | NA                  | 1.28 (1.02 to 1.61)  | 1.3 (1 to 1.6)                             | 2.6 (2 to 3.2)                                 | Moderate                    |
| <b>Attention-deficit/hyperactivity disorder (ADHD)</b>                            | 2                     | 45,153          | No                 | Yes ¶         | No           | No **       | NA                  | 0.88 (0.69 to 1.13)  | 0.9 (0.7 to 1.1)                           | 1.8 (1.4 to 2.3)                               | Moderate                    |
| <b>Obsessive-Compulsive Disorder (OCD)</b>                                        | 2                     | 45,153          | No                 | No            | No           | No **       | NA                  | 0.76 (0.49 to 1.2)   | 0.8 (0.5 to 1.2)                           | 1.5 (1 to 2.4)                                 | High                        |
| <b>Schizophrenia</b>                                                              | 3                     | 98,340          | No                 | No            | Yes §        | Yes ‡       | NA                  | 1.78 (1.2 to 2.65)   | 1.8 (1.2 to 2.7)                           | 3.6 (2.4 to 5.3)                               | Low                         |
| <b>Post-traumatic stress disorder (PTSD)</b>                                      | 5                     | 271,300         | No †               | Yes ¶         | Yes §        | No **       | NA                  | 1.08 (0.78 to 1.5)   | 1.1 (0.8 to 1.5)                           | 2.2 (1.6 to 3)                                 | Low                         |

OR: odds ratio, 95%CI: 95% confidence interval, NA: not applicable; ED: emergency department; COPD: Chronic obstructive pulmonary disease

\* We estimated the absolute risk of fatal or non-fatal overdose for each predictor using a baseline risk of 1% for fatal overdose or 2% for non-fatal overdose and the adjusted OR

† We did not rate down for risk of bias as subgroup analysis showed no significant difference in studies at low vs. high risk of bias on a component-by-component basis.

‡ We rated down for inconsistency because of large heterogeneity across studies.

§ We rated down for indirectness as the evidence was drawn indirectly from high-risk population (e.g., veterans, ≥60% study population with mental disorders, or use of high dose opioids)

¶ We rated down for imprecision because the lower and upper limits of 95%CI associated with the adjusted OR included both large and small associations with opioid overdose (95%CI of adjusted OR included the threshold of large association of OR=2 or OR=0.5).

\*\* Although the estimate of precision included no significant association, we did not rate down for imprecision because the 95%CI did not include important association.

eTable 9 GRADE evidence profile of medical factors associated with opioid overdose

| Predictors                        | Study characteristics |                 | Quality assessment |               |              |              |                     | Summary of Findings  |                                            |                                                | Overall quality of evidence |
|-----------------------------------|-----------------------|-----------------|--------------------|---------------|--------------|--------------|---------------------|----------------------|--------------------------------------------|------------------------------------------------|-----------------------------|
|                                   | No. of Studies        | No. of Patients | Risk of bias       | Inconsistency | Indirectness | Imprecision  | Small study effects | Adjusted OR (95% CI) | Risk of fatal overdose (95%CI) *, per 1000 | Risk of non-fatal overdose (95%CI) *, per 1000 |                             |
| <b>Heart failure</b>              | 3                     | 672,544         | No                 | No            | No           | <b>Yes ‡</b> | NA                  | 1.67 (1.39 to 2)     | 1.7 (1.4 to 2)                             | 3.3 (2.8 to 4)                                 | Moderate                    |
| <b>Hemiplegia or paraplegia</b>   | 3                     | 672,544         | No                 | No            | <b>Yes §</b> | No           | NA                  | 1.45 (1.21 to 1.75)  | 1.5 (1.2 to 1.8)                           | 2.9 (2.4 to 3.5)                               | Moderate                    |
| <b>Injury or acute pain</b>       | 5                     | 203,655         | No †               | No            | <b>Yes §</b> | No           | NA                  | 1.42 (1.27 to 1.59)  | 1.4 (1.3 to 1.6)                           | 2.8 (2.5 to 3.2)                               | Moderate                    |
| <b>ED visit</b>                   | 2                     | 45,153          | No                 | <b>Yes ¶</b>  | No           | No           | NA                  | 1.39 (1.28 to 1.5)   | 1.4 (1.3 to 1.5)                           | 2.8 (2.6 to 3)                                 | Moderate                    |
| <b>Renal disease</b>              | 5                     | 726,080         | <b>Yes #</b>       | No            | No           | No           | NA                  | 1.35 (1.01 to 1.79)  | 1.4 (1 to 1.8)                             | 2.7 (2 to 3.6)                                 | Moderate                    |
| <b>COPD</b>                       | 8                     | 1,595,443       | No †               | No            | No           | No           | NA                  | 1.34 (1.19 to 1.49)  | 1.3 (1.2 to 1.5)                           | 2.7 (2.4 to 3)                                 | High                        |
| <b>Liver diseases</b>             | 6                     | 726,346         | No †               | No            | No           | No           | NA                  | 1.24 (1.13 to 1.36)  | 1.2 (1.1 to 1.4)                           | 2.5 (2.3 to 2.7)                               | High                        |
| <b>Cancer</b>                     | 5                     | 786,330         | No †               | No            | No           | No           | NA                  | 1.2 (1.02 to 1.4)    | 1.2 (1 to 1.4)                             | 2.4 (2 to 2.8)                                 | High                        |
| <b>Hypertension</b>               | 2                     | 45,153          | No                 | No            | No           | No           | NA                  | 1.18 (1.08 to 1.28)  | 1.2 (1.1 to 1.3)                           | 2.4 (2.2 to 2.6)                               | High                        |
| <b>Diabetes</b>                   | 2                     | 45,153          | No                 | No            | <b>Yes §</b> | No           | NA                  | 1.18 (1.07 to 1.29)  | 1.2 (1.1 to 1.3)                           | 2.4 (2.1 to 2.6)                               | Moderate                    |
| <b>Charlson comorbidity index</b> | 4                     | 76,174          | <b>Yes #</b>       | No            | No           | No           | NA                  | 1.14 (1.02 to 1.27)  | 1.1 (1 to 1.3)                             | 2.3 (2 to 2.5)                                 | Moderate                    |
| <b>Headache</b>                   | 7                     | 463,711         | No †               | <b>Yes ¶</b>  | No           | No *         | NA                  | 1.18 (0.95 to 1.47)  | 1.2 (1 to 1.5)                             | 2.4 (1.9 to 2.9)                               | Moderate                    |
| <b>Neck/Back pain</b>             | 6                     | 317,176         | <b>Yes #</b>       | No            | No           | No *         | NA                  | 1.12 (0.97 to 1.28)  | 1.1 (1 to 1.3)                             | 2.2 (1.9 to 2.6)                               | Moderate                    |

| Predictors                          | Study characteristics |                 | Quality assessment |                           |                  |                  |                     | Summary of Findings  |                                            |                                                | Overall quality of evidence |
|-------------------------------------|-----------------------|-----------------|--------------------|---------------------------|------------------|------------------|---------------------|----------------------|--------------------------------------------|------------------------------------------------|-----------------------------|
|                                     | No. of Studies        | No. of Patients | Risk of bias       | Inconsistency             | Indirectness     | Imprecision      | Small study effects | Adjusted OR (95% CI) | Risk of fatal overdose (95%CI) *, per 1000 | Risk of non-fatal overdose (95%CI) *, per 1000 |                             |
| <b>Fibromyalgia</b>                 | 3                     | 47,180          | Yes <sup>#</sup>   | No                        | No               | No <sup>**</sup> | NA                  | 1.12 (1 to 1.26)     | 1.1 (1 to 1.3)                             | 2.2 (2 to 2.5)                                 | Moderate                    |
| <b>Neuropathic pain</b>             | 7                     | 455,798         | No <sup>†</sup>    | Yes <sup>¶</sup>          | No               | No <sup>**</sup> | NA                  | 1.04 (0.82 to 1.31)  | 1 (0.8 to 1.3)                             | 2.1 (1.6 to 2.6)                               | Moderate                    |
| <b>Dementia</b>                     | 2                     | 45,153          | No                 | No                        | Yes <sup>§</sup> | No <sup>**</sup> | NA                  | 0.96 (0.56 to 1.66)  | 1 (0.6 to 1.7)                             | 1.9 (1.1 to 3.3)                               | Moderate                    |
| <b>Sleep apnea</b>                  | 5                     | 914,516         | No <sup>†</sup>    | Yes <sup>¶</sup>          | No               | No <sup>**</sup> | NA                  | 1.09 (0.98 to 1.21)  | 1.1 (1 to 1.2)                             | 2.2 (2 to 2.4)                                 | Moderate                    |
| <b>HIV/AIDS</b>                     | 5                     | 726,080         | Yes <sup>#</sup>   | No                        | No               | No <sup>**</sup> | NA                  | 1.03 (0.91 to 1.15)  | 1 (0.9 to 1.2)                             | 2.1 (1.8 to 2.3)                               | Moderate                    |
| <b>Sexually transmitted disease</b> | 2                     | 45,153          | No                 | No                        | No               | No <sup>**</sup> | NA                  | 0.94 (0.78 to 1.12)  | 0.9 (0.8 to 1.1)                           | 1.9 (1.6 to 2.2)                               | High                        |
| <b>Herpes simplex infection</b>     | 2                     | 45,153          | No                 | No                        | No               | No <sup>**</sup> | NA                  | 0.8 (0.54 to 1.19)   | 0.8 (0.5 to 1.2)                           | 1.6 (1.1 to 2.4)                               | High                        |
| <b>Burns</b>                        | 2                     | 45,153          | No                 | No                        | No               | Yes <sup>‡</sup> | NA                  | 0.77 (0.49 to 1.21)  | 0.8 (0.5 to 1.2)                           | 1.5 (1 to 2.4)                                 | Moderate                    |
| <b>Number of drugs</b>              | 3                     | 132,801         | Yes <sup>#</sup>   | No                        | No               | No <sup>**</sup> | NA                  | 0.99 (0.94 to 1.04)  | 1 (0.9 to 1)                               | 2 (1.9 to 2.1)                                 | Moderate                    |
| <b>Skin ulcers</b>                  | 3                     | 672,544         | No                 | No                        | Yes <sup>§</sup> | Yes <sup>‡</sup> | NA                  | 1.45 (0.92 to 2.29)  | 1.5 (0.9 to 2.3)                           | 2.9 (1.8 to 4.6)                               | Low                         |
| <b>Chronic pain</b>                 | 3                     | 355,431         | No                 | No                        | Yes <sup>§</sup> | Yes <sup>‡</sup> | NA                  | 1.29 (0.74 to 2.25)  | 1.3 (0.7 to 2.3)                           | 2.6 (1.5 to 4.5)                               | Low                         |
| <b>Peptic ulcer disease</b>         | 3                     | 672,544         | No                 | Yes <sup>¶</sup>          | Yes <sup>§</sup> | No <sup>**</sup> | NA                  | 1.04 (0.73 to 1.48)  | 1 (0.7 to 1.5)                             | 2.1 (1.5 to 3)                                 | Low                         |
| <b>Skin infections/abscesses</b>    | 2                     | 45,153          | No                 | Very serious <sup>¶</sup> | No               | No <sup>**</sup> | NA                  | 1.08 (0.94 to 1.23)  | 1.1 (0.9 to 1.2)                           | 2.2 (1.9 to 2.5)                               | Low                         |

| Predictors                                                       | Study characteristics |                 | Quality assessment |                           |                  |                  |                     | Summary of Findings  |                                            |                                                | Overall quality of evidence |
|------------------------------------------------------------------|-----------------------|-----------------|--------------------|---------------------------|------------------|------------------|---------------------|----------------------|--------------------------------------------|------------------------------------------------|-----------------------------|
|                                                                  | No. of Studies        | No. of Patients | Risk of bias       | Inconsistency             | Indirectness     | Imprecision      | Small study effects | Adjusted OR (95% CI) | Risk of fatal overdose (95%CI) *, per 1000 | Risk of non-fatal overdose (95%CI) *, per 1000 |                             |
| Cardiovascular disease                                           | 2                     | 45,153          | No                 | Yes <sup>¶</sup>          | Yes <sup>§</sup> | No <sup>‡</sup>  | NA                  | 0.9 (0.75 to 1.09)   | 0.9 (0.8 to 1.1)                           | 1.8 (1.5 to 2.2)                               | Low                         |
| Peripheral vascular disease                                      | 3                     | 672,544         | No                 | Yes <sup>¶</sup>          | Yes <sup>§</sup> | No <sup>‡</sup>  | NA                  | 0.99 (0.81 to 1.22)  | 1 (0.8 to 1.2)                             | 2 (1.6 to 2.4)                                 | Low                         |
| Myocardial infarction                                            | 3                     | 672,544         | No                 | Yes <sup>¶</sup>          | Yes <sup>§</sup> | Yes <sup>‡</sup> | NA                  | 1.3 (0.65 to 2.59)   | 1.3 (0.7 to 2.6)                           | 2.6 (1.3 to 5.2)                               | Very Low                    |
| Cerebrovascular disease                                          | 3                     | 672,544         | No                 | Yes <sup>¶</sup>          | Yes <sup>§</sup> | Yes <sup>‡</sup> | NA                  | 1.35 (0.8 to 2.28)   | 1.4 (0.8 to 2.3)                           | 2.7 (1.6 to 4.6)                               | Very Low                    |
| Serious autoimmune rheumatology disease                          | 3                     | 672,544         | No                 | Very serious <sup>¶</sup> | Yes <sup>§</sup> | No <sup>‡</sup>  | NA                  | 1.02 (0.65 to 1.59)  | 1 (0.7 to 1.6)                             | 2 (1.3 to 3.2)                                 | Very Low                    |
| Days of hospitalization during the preceding 6 months (>=1 vs 0) | 2                     | 45,153          | No                 | Very serious <sup>¶</sup> | Yes <sup>§</sup> | No <sup>‡</sup>  | NA                  | 1.04 (0.94 to 1.14)  | 1 (0.9 to 1.1)                             | 2.1 (1.9 to 2.3)                               | Very Low                    |

OR: odds ratio, 95%CI: 95% confidence interval, NA: not applicable; ED: emergency department; COPD: chronic obstructive pulmonary disease; HIV: human immunodeficiency virus; AIDS: acquired immunodeficiency syndrome.

\* We estimated the absolute risk of fatal or non-fatal overdose for each predictor using a baseline risk of 1% for fatal overdose or 2% for non-fatal overdose and the adjusted OR

‡ We rated down for imprecision because the lower and upper limits of 95%CI associated with the adjusted OR included both large and small associations with opioid overdose (95%CI<sup>§</sup> We rated down for indirectness as the evidence was drawn indirectly from high-risk population (e.g., veterans, ≥60% study population with mental disorders, or use of high dose opioids)

† We did not rate down for risk of bias as subgroup analysis showed no significant difference in studies at low vs. high risk of bias on a component-by-component basis.

# We rated down for risk of bias because of at least 20% of the total weight from studies with high-risk of bias. of adjusted OR included the threshold of large association of OR=2 or OR=0.5).

¶ We rated down for inconsistency because of large heterogeneity across studies.

‡ Although the estimate of precision included no significant association, we did not rate down for imprecision because the 95%CI did not include important association.

¶ We rated down two levels for very serious inconsistency between studies.

eTable 10 GRADE evidence profile of socio-demographic factors associated with opioid overdose

| Predictors                                       |                       | Study characteristics |                 | Quality assessment |               |              |             | Summary of Findings        |                      |                                            | Overall quality of evidence |                                                |
|--------------------------------------------------|-----------------------|-----------------------|-----------------|--------------------|---------------|--------------|-------------|----------------------------|----------------------|--------------------------------------------|-----------------------------|------------------------------------------------|
|                                                  |                       | No. of Studies        | No. of patients | Risk of bias       | Inconsistency | Indirectness | Imprecision | Small study effects        | Adjusted OR (95% CI) | Risk of fatal overdose (95%CI) *, per 1000 |                             | Risk of non-fatal overdose (95%CI) *, per 1000 |
| <b>Age (every 10-year decrement from age 80)</b> |                       | 18                    | 2,305,963       | No †               | No            | No           | No          | Undetected; Egger's p=0.55 | 1.22 (1.02 to 1.46)  | 1.2 (1 to 1.5)                             | 2.4 (2 to 2.9)              | High                                           |
| <b>Gender (male vs. female)</b>                  |                       | 20                    | 2,359,499       | No †               | No            | No           | No          | Undetected; Egger's p=0.98 | 1.1 (1.01 to 1.19)   | 1.1 (1 to 1.2)                             | 2.2 (2 to 2.4)              | High                                           |
| <b>Non-married vs. Married</b>                   |                       | 4                     | 927,098         | Yes #              | No            | No           | No          | NA                         | 1.34 (1.27 to 1.41)  | 1.3 (1.3 to 1.4)                           | 2.7 (2.5 to 2.8)            | Moderate                                       |
| <b>White race vs others</b>                      |                       | 14                    | 1,964,160       | No †               | No            | No           | No          | Undetected; Egger's p=0.12 | 1.5 (1.28 to 1.77)   | 1.5 (1.3 to 1.8)                           | 3 (2.6 to 3.5)              | High                                           |
| <b>Regions</b>                                   | West vs. Northeast    | 6                     | 523,645         | No †               | No            | No           | No          | NA                         | 1.43 (1.16 to 1.76)  | 1.4 (1.2 to 1.8)                           | 2.9 (2.3 to 3.5)            | High                                           |
|                                                  | Midwest vs. Northeast | 5                     | 394,971         | No †               | No            | No           | No          | NA                         | 1.21 (1.09 to 1.33)  | 1.2 (1.1 to 1.3)                           | 2.4 (2.2 to 2.7)            | High                                           |
|                                                  | South vs. Northeast   | 6                     | 846,894         | No †               | No            | No           | No          | NA                         | 1.09 (1.004 to 1.19) | 1.1 (1 to 1.2)                             | 2.2 (2 to 2.4)              | High                                           |
| <b>Insurance (vs. private insurance)</b>         | Medicaid              | 2                     | 276,493         | No                 | No            | No           | Yes ‡       | NA                         | 1.73 (1.48 to 2.02)  | 1.7 (1.5 to 2)                             | 3.5 (3 to 4)                | Moderate                                       |
|                                                  | Medicare              | 2                     | 408,578         | No                 | No            | No           | Yes ‡       | NA                         | 1.75 (1.51 to 2.03)  | 1.8 (1.5 to 2)                             | 3.5 (3 to 4.1)              | Moderate                                       |
|                                                  | Uninsured             | 2                     | 244,755         | No                 | No            | No           | Yes ‡       | NA                         | 1.79 (1.51 to 2.12)  | 1.8 (1.5 to 2.1)                           | 3.6 (3 to 4.2)              | Moderate                                       |

| Predictors                      | Study characteristics |                 | Quality assessment |               |              |             |                     | Summary of Findings  |                                            |                                                | Overall quality of evidence |
|---------------------------------|-----------------------|-----------------|--------------------|---------------|--------------|-------------|---------------------|----------------------|--------------------------------------------|------------------------------------------------|-----------------------------|
|                                 | No. of Studies        | No. of patients | Risk of bias       | Inconsistency | Indirectness | Imprecision | Small study effects | Adjusted OR (95% CI) | Risk of fatal overdose (95%CI) *, per 1000 | Risk of non-fatal overdose (95%CI) *, per 1000 |                             |
| <b>Urban vs. rural areas</b>    | 5                     | 1,105,554       | No †               | No            | No           | No*         | NA                  | 1.07 (0.95 to 1.2)   | 1.1 (1 to 1.2)                             | 2.1 (1.9 to 2.4)                               | High                        |
| <b>Overweight &amp; Obesity</b> | 5                     | 196,829         | Yes #              | Yes ¶         | No           | No*         | NA                  | 0.96 (0.73 to 1.27)  | 1 (0.7 to 1.3)                             | 1.9 (1.5 to 2.5)                               | Low                         |

OR: odds ratio, 95%CI: 95% confidence interval, NA: not applicable

\* We estimated the absolute risk of fatal or non-fatal overdose for each predictor using a baseline risk of 1% for fatal overdose or 2% for non-fatal overdose and the adjusted OR

† We did not rate down for risk of bias as subgroup analysis showed no significant difference in studies at low vs. high risk of bias on a component-by-component basis.

# We rated down for risk of bias because of at least 20% of the total weight from studies with high-risk of bias.

‡ We rated down for imprecision because the lower and upper limits of 95%CI associated with the adjusted OR included the threshold of important association of OR=2 or OR=0.5.

§ Although the estimate of precision included no significant association, we did not rate down for imprecision because the 95%CI did not include important association.

¶ We rated down for inconsistency because of large heterogeneity across studies.

**eTable 11 Consistency of results of predictors between pooled and unpooled studies**

| Predictors                                       | Pooled results      |                         | Unpooled results                                                    |                     |                         |
|--------------------------------------------------|---------------------|-------------------------|---------------------------------------------------------------------|---------------------|-------------------------|
|                                                  | Significant factors | Non-significant factors | Predictor name measured                                             | Significant factors | Non-significant factors |
|                                                  | No. of studies (n)  | No. of studies (n)      |                                                                     | No. of studies (n)  | No. of studies (n)      |
| <b>Opioid dose-response relationship</b>         | 14 (1,315,173)      |                         |                                                                     | 3 (487,638) *       | 0                       |
| <b>Long- vs short-acting opioid formulations</b> | 8 (925,558)         |                         | Opioid drug type with long- & short-acting formulation #            | 1 (150,821) #       | 0                       |
| <b>Duration of opioid use</b>                    | 2 (153,033)         |                         | Periods on long-term opioids vs. Periods not on long-term opioids † | 1 (98,140) †        | 0                       |
| <b>Mental health diagnosis</b>                   | 17 (1,572,200)      |                         | Mental health care visit §                                          | 1 (151,313) §       | 0                       |
| <b>Current substance use disorder</b>            | 12 (1,143,838)      |                         | Opioid and non-opioid use disorder ‡                                | 1 (405,631) ‡       | 0                       |
| <b>Chronic pain</b>                              |                     | 3 (355,431)             | Pain clinic visit *                                                 | 1 (151,313) *       | 2 (53,453) *            |
| <b>Age</b>                                       | 15 (1,418,516)      |                         | Age ¶                                                               | 1 (42,828) ¶        | 1 (10,708) ¶            |
| <b>Charlson comorbidity index</b>                | 3 (22,987)          |                         | Rx-Risk Comorbidity Index                                           | 0                   | 1 (9,940)               |
| <b>HIV/AIDS</b>                                  |                     | 4 (98,689)              | Viral load or CD4 cell counts                                       | 0                   | 1 (9,272)               |
| <b>Renal disease</b>                             |                     | 4 (98,689)              | Renal insufficiency                                                 | 0                   | 1 (266)                 |
| <b>Chronic pain</b>                              |                     | 2 (148,562)             | Multiple chronic noncancer pain conditions                          | 0                   | 1 (266)                 |

HIV: human immunodeficiency virus; AIDS: acquired immunodeficiency syndrome.

\* Three studies showed significant association between higher opioid dose and overdose below

- Young 2019 reported dose-response relationship by comparing  $\geq 90$  mg vs. 20-50mg and  $\geq 90$  mg vs. 50-90mg among 4 categories of follow-up periods (ranging from 0 to 1 year)

|                    | $\geq 90$ mg vs. 20-50mg |           | $\geq 90$ mg vs. 20-50mg |           |
|--------------------|--------------------------|-----------|--------------------------|-----------|
|                    | HR                       | 95% CI    | HR                       | 95% CI    |
| IPTW (0-7 days)    | 2.23                     | 1.75-2.84 | 1.81                     | 1.50-2.20 |
| IPTW (8-30 days)   | 1.46                     | 1.17-1.81 | 1.12                     | 0.94-1.34 |
| IPTW (31-90 days)  | 1.52                     | 1.29-1.79 | 1.28                     | 1.13-1.46 |
| IPTW (91-365 days) | 1.44                     | 1.31-1.58 | 1.15                     | 1.07-1.23 |

- Hayes 2020 reported the association of opioid dose escalators (at least a 20% increase) vs. maintainers with adjusted OR 1.39 (95%CI 1.02 to 1.9)
- Lo-Ciganic 2022 reported dose-response relationship for both opioid and benzodiazepine

| Trajectory Groups                                              | Adjusted HR (95%CI) |
|----------------------------------------------------------------|---------------------|
| A. Very-low OPI (early discontinuation)-Very-low declining BZD | Ref                 |
| B. Very-low OPI (early discontinuation)-Very-low stable BZD    | 0.29 (0.06, 1.29)   |
| C. Very-low OPI (early discontinuation)-Medium BZD             | 0.64 (0.22, 1.90)   |
| D. Low OPI-Low BZD                                             | 1.17 (0.49, 2.79)   |
| E. Low OPI-High BZD                                            | 3.27 (1.61, 6.63)   |
| F. Medium OPI-Low BZD                                          | 4.04 (2.06, 7.95)   |
| G. Very-high OPI-High BZD                                      | 6.98 (3.11, 15.64)  |



|                                |                    |
|--------------------------------|--------------------|
| H. Very-high OPI-Very-high BZD | 4.41 (1.51, 12.85) |
| I. Very-high OPI-Low BZD       | 6.50 (3.15, 13.42) |

# One study (Garg 2017) reported Schedule II vs non-schedule II only, but with different formulation for Schedule II opioids:

- short-acting only: HR 2.3 (1.6–3.3)
- long-acting only: HR 4.5 (3.1–6.4)
- both short- and long-acting: HR 4.7 (3.3–6.9)

† One study (Bedson 2019) reported the association of periods on long-term opioids vs. not on long-term opioids: HR 2.24 (95%CI 1.73, 2.89)

§ One study (Hayes 2020) reported a borderline significant association of mental health care visit OR & 95%CI: 1.012 (1.008 to 1.017)

‡ Hayes 2022a reported large association between opioid or non-opioid use disorder and opioid overdose with adjusted OR & 95%CI: 0.65 (0.34 to 0.96) and 0.31 (0.11 to 0.52) using accelerated failure time model.

\* One study (Hayes 2020) reported a borderline significant association of pain clinic visit OR & 95%CI: 1.053 (1.017 to 1.092); but another two study (Hayes 2020, Salkar 2021) reported no significant difference with multiple chronic noncancer pain conditions.

‡ Age-squared was adjusted as well

**eTable 12 Summary table of opioid tapering or discontinuation**

| Study           | Overdose type | No. patients             |           | Tapering/discontinuation definition                                                                                                                               | Reference                                                                  | Results in adjusted analysis HR/RR/IRR/OR/0 (95%CI) | Conclusion                                                                                                                            |
|-----------------|---------------|--------------------------|-----------|-------------------------------------------------------------------------------------------------------------------------------------------------------------------|----------------------------------------------------------------------------|-----------------------------------------------------|---------------------------------------------------------------------------------------------------------------------------------------|
|                 |               | tapering/discontinuation | Reference |                                                                                                                                                                   |                                                                            |                                                     |                                                                                                                                       |
| James, 2019     | Fatal         | 344                      | 228       | Discontinued: Patients with chronic opioid therapy who were removed from the opioid registry at any point during the study period for any reason other than death | Chronic opioid therapy: regular opioid prescriptions for at least 3 months | HR <b>2.94 (1.01 to 8.61)</b>                       | <b>Opioid discontinuation was associated with increased risk of overdose death</b>                                                    |
| Laroche, 2022 * | Fatal         | 42,246                   | 332,121   | Tapering: 2 consecutive months with a mean MME reduction of $\geq 15\%$ compared with the baseline month.                                                         | Stable dosage: MME $\geq 50$ mg daily, no taper or abrupt discontinuation  | RR <b>1.16 (1.01 to 1.30)</b>                       | <b>Opioid tapering was associated with increased risk of opioid-related suicide</b>                                                   |
|                 |               | 6,886                    |           | Abrupt discontinuation: the second qualifying month had an MME equal to 0 mg.                                                                                     |                                                                            | RR 1.55 (0.99 to 2.13)                              | No significant association between abrupt opioid discontinuation and opioid-related suicide                                           |
|                 | Non-fatal     | 42,246                   | 332,121   | Tapering: 2 consecutive months with a mean MME reduction of $\geq 15\%$ compared with the baseline month.                                                         | Stable dosage: MME $\geq 50$ mg daily, no taper or abrupt discontinuation  | RR 1.16 (0.99 to 1.37)                              | No significant association between opioid tapering and non-fatal opioid overdose                                                      |
|                 |               | 6,886                    |           | Abrupt discontinuation: the second qualifying month had an MME equal to 0 mg.                                                                                     |                                                                            | RR 1.26 (0.68 to 2.03)                              | No significant association between abrupt opioid discontinuation and non-fatal opioid overdose                                        |
|                 | Mixed         | 42,246                   | 332,121   | Tapering: 2 consecutive months with a mean MME reduction of $\geq 15\%$ compared with the baseline month.                                                         | Stable dosage: MME $\geq 50$ mg daily, no taper or abrupt discontinuation  | RR <b>1.15 (1.04 to 1.27)</b>                       | <b>Opioid tapering was associated with increased risk of composite opioid overdose (mixed non-fatal overdose and suicide)</b>         |
|                 |               | 6,886                    |           | Abrupt discontinuation: the second qualifying month had an MME equal to 0 mg.                                                                                     |                                                                            | RR 1.34 (0.97 to 1.79)                              | No significant association between abrupt opioid discontinuation and composite opioid overdose (mixed non-fatal overdose and suicide) |

| Study          | Overdose type | No. patients             |           | Tapering/discontinuation definition                                                                                                                             | Reference                                       | Results in adjusted analysis HR/RR/IRR/OR/θ (95%CI)                  | Conclusion                                                                                                                                                       |
|----------------|---------------|--------------------------|-----------|-----------------------------------------------------------------------------------------------------------------------------------------------------------------|-------------------------------------------------|----------------------------------------------------------------------|------------------------------------------------------------------------------------------------------------------------------------------------------------------|
|                |               | tapering/discontinuation | Reference |                                                                                                                                                                 |                                                 |                                                                      |                                                                                                                                                                  |
| Agnoli, 2021 * | Mixed         | 29,101                   | 84,517    | Tapering: for all months after the first of 6 overlapping 60-day period in which a person's mean daily opioid dose decreased by ≥15% from their baseline period | Stable dosage: MME ≥50 mg daily, no tapering    | IRR 1.17 (0.98-1.40)                                                 | No significant association between opioid tapering and opioid overdose                                                                                           |
| DiPrete, 2022  | Mixed         | 19,443                   |           | Gradual dose tapering or discontinuation: ≤10% dose reduction per week (≤34% per month)                                                                         | Dose maintained (MME ≥90 mg daily) or increased | HR 1.12 (0.65, 1.92) at 0-12m, HR 2.12 (1.00, 4.50) at 13-48m        | No significant association between gradual opioid tapering or discontinuation and opioid overdose                                                                |
|                |               |                          |           | Rapid dose tapering or discontinuation: dose reduction >10% per week (>34% per month)                                                                           | Dose maintained (MME ≥90 mg daily) or increased | HR 1.45 (0.94, 2.25) at 0-12m, HR <b>3.05 (1.59, 5.85)</b> at 13-48m | <b>Rapid opioid tapering or discontinuation was associated with increased risk of opioid overdose at 13-48 months</b> , but was not significant within 12 months |
|                | Fatal         | 19,443                   |           | Gradual dose tapering or discontinuation: ≤10% dose reduction per week (≤34% per month)                                                                         | Dose maintained (MME ≥90 mg daily) or increased | HR 0.88 (0.26, 2.93) at 0-12m, HR 1.09 (0.27, 4.30) at 13-48m        | No significant association between gradual opioid tapering or discontinuation and fatal opioid overdose                                                          |
|                |               |                          |           | Rapid dose tapering or discontinuation: dose reduction >10% per week (>34% per month)                                                                           | Dose maintained (MME ≥90 mg daily) or increased | HR 1.63 (0.56, 4.72) at 0-12m, HR 1.52 (0.50, 4.62) at 13-48 months  | No significant association between rapid opioid tapering or discontinuation and fatal opioid overdose                                                            |
|                | Non-fatal     | 19,443                   |           | Gradual dose tapering or discontinuation: ≤10% dose reduction per week (≤34% per month)                                                                         | Dose maintained (MME ≥90 mg daily) or increased | HR 1.24 (0.69, 2.21) at 0-12m, HR 2.24 (0.99, 5.05) at 13-48m        | No significant association between gradual opioid tapering or discontinuation and non-fatal opioid overdose                                                      |
|                |               |                          |           | Rapid dose tapering or discontinuation: dose reduction >10% per week (>34% per month)                                                                           | Dose maintained (MME ≥90 mg daily) or increased | HR 1.34 (0.84, 2.14) at 0-12m, HR <b>3.29 (1.64, 6.62)</b> at 13-48m | <b>Rapid opioid tapering or discontinuation was associated with increased risk of non-fatal overdose at 13-48 months</b> , but was                               |

| Study                       | Overdose type | No. patients             |           | Tapering/discontinuation definition                                         | Reference                                                                                                | Results in adjusted analysis HR/RR/IRR/OR/θ (95%CI) | Conclusion                                                                                                         |
|-----------------------------|---------------|--------------------------|-----------|-----------------------------------------------------------------------------|----------------------------------------------------------------------------------------------------------|-----------------------------------------------------|--------------------------------------------------------------------------------------------------------------------|
|                             |               | tapering/discontinuation | Reference |                                                                             |                                                                                                          |                                                     |                                                                                                                    |
|                             |               |                          |           |                                                                             |                                                                                                          |                                                     | not significant within 12 months                                                                                   |
| Hayes, 2022a <sup>#,†</sup> | Non-fatal     | 72,092                   | 143,950   | Persistent Moderate Days Covered                                            | Persistent high days covered                                                                             | θ 0.71 (0.60, 0.84)                                 | <b>Persistent moderate days covered trajectory was associated with decreased risk of non-fatal opioid overdose</b> |
|                             |               | 71,006                   |           | Persistent Modest Days Covered                                              |                                                                                                          | θ 0.77 (0.65, 0.91)                                 | <b>Persistent modest days covered trajectory was associated with decreased risk of non-fatal opioid overdose</b>   |
|                             |               | 23,927                   |           | Delayed Days Covered Reduction                                              |                                                                                                          | θ 1.18 (0.97, 1.42)                                 | No significant association between delayed days covered reduction trajectory and non-fatal opioid overdose         |
|                             |               | 51,181                   |           | Moderate Paced Discontinuation                                              |                                                                                                          | θ 0.91 (0.77, 1.08)                                 | No significant association between moderate paced discontinuation trajectory and non-fatal opioid overdose         |
|                             |               | 17,578                   |           | Delayed Discontinuation                                                     |                                                                                                          | θ 1.13 (0.90, 1.41)                                 | No significant association between delayed discontinuation trajectory and non-fatal opioid overdose                |
|                             |               | 25,897                   |           | Rapid Discontinuation                                                       |                                                                                                          | θ 0.54 (0.41, 0.72)                                 | <b>Rapid discontinuation was associated with decreased risk of non-fatal opioid overdose</b>                       |
| Hayes, 2021 <sup>#</sup>    | Non-fatal     | 22,646                   | 128,816   | Discontinued: no any opioid prescription fills in the second 180-day period | COT: receiving ≥ 90-day supply of non-parenteral opioids within any 180-day period with no gaps >30 days | OR 0.638 (0.463, 0.879)                             | <b>Discontinuation of chronic opioid therapy was associated with decreased risk of non-fatal opioid overdose</b>   |

| Study          | Overdose type | No. patients             |           | Tapering/discontinuation definition                                                                                      | Reference                                                               | Results in adjusted analysis HR/RR/IRR/OR/θ (95%CI) | Conclusion                                                                                                                                    |
|----------------|---------------|--------------------------|-----------|--------------------------------------------------------------------------------------------------------------------------|-------------------------------------------------------------------------|-----------------------------------------------------|-----------------------------------------------------------------------------------------------------------------------------------------------|
|                |               | tapering/discontinuation | Reference |                                                                                                                          |                                                                         |                                                     |                                                                                                                                               |
| Hayes, 2022b # | Non-fatal     | 40,184                   | 58,927    | Switching to intermittent opioid therapy: at least one opioid prescription within 180 days, but not meeting LTOT criteri | LTOT: >90 days' supply of opioids within 180 days with no gaps >30 days | OR 1.037 (0.820, 1.312)                             | No significant associations between transitioning patients from LTOT to intermittent opioid therapy and the risk of non-fatal opioid overdose |

HR: hazard ratio, RR: risk ratio; IRR: incidence risk ratio, OR: odds ratio, MME: morphine milligram equivalents; COT: chronic opioid therapy; LTOT: long-term opioid therapy

Significant association was highlighted in **bold**

\* Agnoli 2021 is overlapped with Larochelle 2022

# Hayes 2021 and Hayes 2022b are overlapped with Hayes 2022a

† Hayes 2022a constructed 7 trajectories of opioid therapy based on the number of days opioids were supplied in 180-day time periods following initial LTOT and analyzed the association between trajectory group and opioid overdose using accelerated failure time model.

eTable 13 Significant associations of six unpooled predictors with opioid overdose

| Predictor                                                                                 | Significant association with opioid overdose |                                                                                                                                                                                       | Non-significant association | Total | Notes for significant results |                                                                                                                                                                                                                                         |
|-------------------------------------------------------------------------------------------|----------------------------------------------|---------------------------------------------------------------------------------------------------------------------------------------------------------------------------------------|-----------------------------|-------|-------------------------------|-----------------------------------------------------------------------------------------------------------------------------------------------------------------------------------------------------------------------------------------|
|                                                                                           | No. studies (n)                              | OR/HR (95%CI) & p-value                                                                                                                                                               |                             |       |                               | No. studies (n)                                                                                                                                                                                                                         |
| <b>Opioid-related factor</b>                                                              |                                              |                                                                                                                                                                                       |                             |       |                               |                                                                                                                                                                                                                                         |
| <b>Patients without prior established opioid tolerance to those with opioid tolerance</b> | 1 (372,038)                                  | OR & 95%CI<br>0-7 days: 1.37 (1.07 to 1.76), p=0.01<br>8-30 days: 0.89 (0.67 to 1.19), p=0.43<br>31-90 days: 0.93 (0.77 to 1.14), p=0.48<br>91-365 days: 0.82 (0.72 to 0.92), p=0.002 |                             | 0     | 1 (372,038)                   | Patients without established opioid tolerance prior to initiation were more likely to be diagnosed with opioid overdose in the first 7 days; but less likely after 7 days, particularly in 91 to 365 days after initiation (Young 2019) |
| <b>Medical factors</b>                                                                    |                                              |                                                                                                                                                                                       |                             |       |                               |                                                                                                                                                                                                                                         |
| <b>Traumatic brain injury (TBI)</b>                                                       | 1 (49,014)                                   | <b>HR &amp; 95%CI: 2.18 (1.57 to 3.05), p&lt;0.001</b>                                                                                                                                |                             | 0     | 1 (49,014)                    | Veterans with TBI was associated with increased risk of opioid overdose (Fonda 2020)                                                                                                                                                    |
| <b>Average pain score in 180 days before dose change index date</b>                       | 1(53,187)                                    | OR & 95%CI: 1.17 (1.02 to 1.33), p=0.02                                                                                                                                               |                             | 0     | 1(53,187)                     | Higher average pain score in 180 days before dose change index date was associated with increased risk of opioid overdose (Hayes 2020)                                                                                                  |
| <b>Social-demographic factors</b>                                                         |                                              |                                                                                                                                                                                       |                             |       |                               |                                                                                                                                                                                                                                         |
| <b>Regions in England</b>                                                                 | 1 (10,801)                                   | HR & 95%CI, p-value<br>South vs. London, 3.28 (1.52 to 7.09), p=0.003<br>North vs. London, 3.27 (1.51 to 7.04), p=0.003<br>Midlands and East, 2.42 (1.10 to 5.32), p=0.03             |                             | 0     | 1 (10,801)                    | Patients living in South, North, Midlands and East of England were associated with higher risk of opioid overdose (Bedson 2019)                                                                                                         |

| Predictor                                                               | Significant association with opioid overdose |                                                                                                                                                                                                                                                                                                                                                                                                                                                                                                    | Non-significant association | Total         | Notes for significant results                                                                                                                                                                                                                                                                                                                                                                                                                                                                                |
|-------------------------------------------------------------------------|----------------------------------------------|----------------------------------------------------------------------------------------------------------------------------------------------------------------------------------------------------------------------------------------------------------------------------------------------------------------------------------------------------------------------------------------------------------------------------------------------------------------------------------------------------|-----------------------------|---------------|--------------------------------------------------------------------------------------------------------------------------------------------------------------------------------------------------------------------------------------------------------------------------------------------------------------------------------------------------------------------------------------------------------------------------------------------------------------------------------------------------------------|
|                                                                         | No. studies (n)                              | OR/HR (95%CI) & p-value                                                                                                                                                                                                                                                                                                                                                                                                                                                                            |                             |               |                                                                                                                                                                                                                                                                                                                                                                                                                                                                                                              |
| <b>Social-economic status measured by Index of Multiple Deprivation</b> | 1 (98,140)                                   | HR & 95%CI, p-value<br>Level 2 vs 1, 1.34 (0.82 to 2.19), p=0.25<br>Level 3 vs 1, 1.24 (0.76 to 2.04), p=0.38<br>Level 4 vs 1, 1.19 (0.74 to 1.94), p=0.47<br>Level 5 vs 1, 1.7 (1.07 to 2.69), p=0.02                                                                                                                                                                                                                                                                                             | 0                           | 1 (98,140)    | Patients living in higher neighbourhood deprivation level is associated with higher risk of intentional opioid overdose, particularly the highest level vs. the lowest level (Bedson 2019)                                                                                                                                                                                                                                                                                                                   |
| <b>Year</b>                                                             | 3 (878,369)                                  | Every-year increase from the year of 2009 to 2016 in USA, OR & 95%CI (Qeadan 2021):<br>Chronic pain syndrome: 0.86 (0.82-0.90)<br>Low back pain population: 0.85 (0.83-0.88)<br>Antiretroviral therapy era for HIV patients In Canada, RR & 95%CI (El-Akkad 2020):<br>2000–2003 vs. 1996–1999: 0.82 (0.56 to 1.19), p=0.31<br>2004–2007 vs. 1996–1999: 0.61 (0.40 to 0.93), p=0.02<br>2008–2011 vs. 1996–1999: 0.53 (0.32 to 0.88), p=0.01<br>2012–2015 vs. 1996–1999: 1.53 (0.82 to 2.89), p=0.19 | 3 (932,400)                 | 6 (1,810,769) | In USA, opioid overdose risk decreases overtime between 2009 to 2016 (Qeadan 2021); however, another two studies showed no significant association for every 6-month increase between 2008 to 2015 (Turner 2015) or 2008 to 2012 (Carey 2018). Also, no significant trend was found in UK between 2002 and 2012 (Bedson 2019); and in Canada among HIV patients, opioid related death decreased between 2004 to 2011 vs. 1996 to 1999, but no significant difference for other time periods (El-Akkad 2020). |

OR: odds ratio, HR: hazard ratio, 95%CI: 95% confidence interval; TBI: traumatic brain injury.

**eTable 14 Non-significant associations of 23 unpooled predictors with opioid overdose**

| Categories of predictors          | Predictors                                                 | Non-significant association<br>No. studies (n) |
|-----------------------------------|------------------------------------------------------------|------------------------------------------------|
| <b>Social-demographic factors</b> | Income or low-income status                                | 2 (32,715)                                     |
|                                   | Non-English speaker                                        | 1 (2027)                                       |
|                                   | Long-term care residence                                   | 1 (2,027)                                      |
| <b>Opioid-related factors</b>     | Schedule II/III/IV opioids                                 | 1 (53,187)                                     |
|                                   | Number of opioid prescriptions dispensed                   | 1 (8,987)                                      |
|                                   | Number of unique opioid NDCs                               | 1 (8,987)                                      |
| <b>Medical factors</b>            | Motor vehicle accidents                                    | 1 (8,987)                                      |
|                                   | Osteoarthritis                                             | 2 (11,967)                                     |
|                                   | Temporomandibular pain                                     | 1 (9,940)                                      |
|                                   | Extremity pain                                             | 1 (9,940)                                      |
|                                   | Abdominal pain                                             | 1 (9,940)                                      |
|                                   | Menstrual pain                                             | 1 (9,940)                                      |
|                                   | All tracer pain conditions                                 | 1 (53,187)                                     |
|                                   | First pain score in 180 days before dose change index date | 1(53,187)                                      |
|                                   | Last pain score in 180 days before dose change index date  | 1(53,187)                                      |
|                                   | Asthma                                                     | 2 (98,406)                                     |
|                                   | Respiratory infection                                      | 1 (226)                                        |
|                                   | Endocarditis                                               | 1 (36,166)                                     |
|                                   | Parkinson                                                  | 1 (226)                                        |
|                                   | Primary care visits in past year                           | 4 (237,298)                                    |
|                                   | Physical therapy visit                                     | 1 (151,313)                                    |
|                                   | Chiropractic care visit                                    | 1 (151,313)                                    |
|                                   | Pharmacy visits in past year                               | 2 (53,536)                                     |

NDCs: National Drug Codes



**eTable 15 Subgroup analyses of pre-defined factors for opioid overdose #**

| Categories              | Predictor                          | Subgroup factor                 |                    | No. of studies | Sample size        | Adjusted OR & 95% CI |        |       | Test of interaction p-value |      |      |
|-------------------------|------------------------------------|---------------------------------|--------------------|----------------|--------------------|----------------------|--------|-------|-----------------------------|------|------|
| Opioids related factors | Opioid dose (every 90-mg increase) | Overdose type                   | Fatal overdose     | 6              | 323639             | 2.58                 | 1.63   | 4.09  | 0.99                        |      |      |
|                         |                                    |                                 | Non-fatal overdose | 5              | 977553             | 2.47                 | 2.07   | 2.96  |                             |      |      |
|                         |                                    |                                 | Mixed              | 3              | 13981              | 2.51                 | 1.10   | 5.68  |                             |      |      |
|                         |                                    | Intentional vs. unintentional   | Intentional        | 2*             | 222086             | 3.13                 | 0.88   | 11.12 | 0.18                        |      |      |
|                         |                                    |                                 | Unintentional      | 7              | 361083             | 2.89                 | 2.14   | 3.91  |                             |      |      |
|                         |                                    |                                 | Mixed              | 6              | 855950             | 1.93                 | 1.40   | 2.66  |                             |      |      |
|                         |                                    | Type of chronic pain            | Cancer             | 1              | 36803              | 6.49                 | 3.47   | 12.14 | 0.68                        |      |      |
|                         |                                    |                                 | CNCP               | 11             | 1233217            | 2.47                 | 1.90   | 3.21  |                             |      |      |
|                         |                                    |                                 | Mixed              | 2              | 45153              | 2.31                 | 1.97   | 2.71  |                             |      |      |
|                         |                                    | Representativeness              | No                 | 6              | 788981             | 2.91                 | 2.14   | 3.97  | 0.37                        |      |      |
|                         |                                    |                                 | Yes                | 8              | 526192             | 2.40                 | 1.79   | 3.21  |                             |      |      |
|                         |                                    | Validated measure               | Yes                | 9              | 1076330            | 2.86                 | 2.16   | 3.78  | 0.18                        |      |      |
|                         |                                    |                                 | No                 | 5              | 238843             | 2.14                 | 1.56   | 2.93  |                             |      |      |
|                         |                                    | Appropriate adjustment          | Yes                | 7              | 414299             | 2.86                 | 2.19   | 3.73  | 0.32                        |      |      |
|                         |                                    |                                 | No                 | 7              | 900874             | 2.29                 | 1.62   | 3.23  |                             |      |      |
|                         |                                    | Long- vs. short- acting opioids |                    | Overdose type  | Fatal overdose     | 1                    | 2212   | 2.00  | 1.61                        | 2.49 | 0.09 |
|                         |                                    |                                 |                    |                | Non-fatal overdose | 4                    | 918956 | 1.55  | 1.34                        | 1.78 |      |
|                         |                                    |                                 |                    |                | Mixed              | 4                    | 57577  | 2.35  | 1.16                        | 4.77 |      |
| Unintentional vs. mixed | Unintentional                      |                                 |                    | 5              | 922731             | 1.51                 | 1.32   | 1.72  | 0.07                        |      |      |
|                         | Mixed                              |                                 |                    | 4              | 56014              | 2.55                 | 1.66   | 3.91  |                             |      |      |
| Type of chronic pain    | CNCP                               |                                 |                    | 7              | 933592             | 2.10                 | 1.52   | 2.90  | 0.07                        |      |      |
|                         | Mixed                              |                                 |                    | 2              | 45153              | 1.51                 | 1.30   | 1.75  |                             |      |      |
| Representativeness      | No                                 |                                 |                    | 5              | 886831             | 1.78                 | 1.20   | 2.64  | 0.59                        |      |      |
|                         | Yes                                |                                 |                    | 4              | 91914              | 2.05                 | 1.46   | 2.88  |                             |      |      |
| Validated measure       | Yes                                |                                 |                    | 3              | 38644              | 1.79                 | 1.26   | 2.53  | 0.64                        |      |      |
|                         | No                                 |                                 |                    | 6              | 940101             | 2.02                 | 1.40   | 2.91  |                             |      |      |
| Appropriate adjustment  | Yes                                |                                 |                    | 6              | 923080             | 1.89                 | 1.38   | 2.59  | 0.67                        |      |      |
|                         | No                                 |                                 |                    | 3              | 55665              | 2.11                 | 1.26   | 3.52  |                             |      |      |
| Use of benzodiazepine   | Type                               |                                 |                    | Current        | 7                  | 289919               | 1.93   | 1.55  | 2.40                        | 0.11 |      |
|                         |                                    |                                 |                    | Prior          | 3                  | 87848                | 2.13   | 1.31  | 3.46                        |      |      |

| Categories              | Predictor              | Subgroup factor               |                               | No. of studies | Sample size | Adjusted OR & 95% CI |      |       | Test of interaction p-value |      |
|-------------------------|------------------------|-------------------------------|-------------------------------|----------------|-------------|----------------------|------|-------|-----------------------------|------|
| Co-prescription factors |                        | Overdose type                 | Mixed                         | 2              | 869097      | 1.21                 | 1.10 | 1.32  | 0.41 <sup>†</sup>           |      |
|                         |                        |                               | Fatal overdose                | 3              | 43933       | 2.75                 | 2.37 | 3.19  |                             |      |
|                         |                        |                               | Non-fatal overdose            | 7              | 1198890     | 1.55                 | 1.23 | 1.96  |                             |      |
|                         |                        | Intentional vs. unintentional | Mixed                         | 2              | 4041        | 1.45                 | 0.69 | 3.05  | 0.07 <sup>†</sup>           |      |
|                         |                        |                               | Unintentional                 | 6              | 971212      | 1.45                 | 1.20 | 1.77  |                             |      |
|                         |                        | Type of chronic pain          | Mixed                         | 6              | 275652      | 2.46                 | 2.06 | 2.94  | 0.48                        |      |
|                         |                        |                               | CNCP                          | 10             | 1201711     | 1.84                 | 1.38 | 2.44  |                             |      |
|                         |                        | Representativeness            | Mixed                         | 2              | 45153       | 1.61                 | 1.29 | 2.02  | 0.09                        |      |
|                         |                        |                               | No                            | 4              | 66215       | 1.48                 | 1.20 | 1.82  |                             |      |
|                         |                        | Validated measure             | Yes                           | 7              | 973780      | 1.97                 | 1.53 | 2.54  | 0.38                        |      |
|                         |                        |                               | No                            | 4              | 71093       | 2.06                 | 1.50 | 2.83  |                             |      |
|                         |                        | Appropriate adjustment        | Yes                           | 8              | 1175771     | 1.70                 | 1.27 | 2.27  | 0.60                        |      |
|                         |                        |                               | No                            | 8              | 1181927     | 1.71                 | 1.37 | 2.14  |                             |      |
|                         |                        | Sedatives and hypnotics       | Intentional vs. unintentional | Unintentional  | 3           | 98340                | 1.32 | 1.21  | 1.44                        | 0.39 |
|                         | Mixed                  |                               |                               | 3              | 239584      | 1.68                 | 0.97 | 2.93  |                             |      |
|                         | Type of chronic pain   |                               | CNCP                          | 4              | 292771      | 1.51                 | 1.20 | 1.897 | 0.26                        |      |
|                         |                        |                               | Mixed                         | 2              | 45153       | 1.29                 | 1.10 | 1.504 |                             |      |
|                         | Representativeness     |                               | No                            | 3              | 62440       | 1.37                 | 0.89 | 2.09  | 0.95                        |      |
|                         |                        |                               | Yes                           | 3              | 275484      | 1.38                 | 1.26 | 1.52  |                             |      |
|                         | Validated measure      |                               | Yes                           | 3              | 68881       | 1.56                 | 0.84 | 2.90  | 0.67                        |      |
|                         |                        |                               | No                            | 3              | 269043      | 1.36                 | 1.10 | 1.68  |                             |      |
|                         | Appropriate adjustment |                               | Yes                           | 4              | 284471      | 1.36                 | 1.21 | 1.53  | 0.47                        |      |
|                         |                        |                               | No                            | 2              | 53453       | 2.05                 | 0.68 | 6.23  |                             |      |
|                         | Muscle relaxants       |                               | Type of chronic pain          | CNCP           | 3           | 19731702             | 1.35 | 0.97  | 1.87                        | 0.77 |
|                         |                        |                               |                               | Mixed          | 2           | 45153                | 1.27 | 1.01  | 1.60                        |      |
|                         |                        |                               | Representativeness            | No             | 3           | 62440                | 1.32 | 0.90  | 1.92                        | 0.94 |
|                         |                        | Yes                           |                               | 2              | 19714416    | 1.34                 | 1.17 | 1.53  |                             |      |
| Validated measure       |                        | Yes                           | 3                             | 19740423       | 1.56        | 0.84                 | 2.90 | 0.42  |                             |      |
|                         |                        | No                            | 2                             | 36432          | 1.19        | 0.93                 | 1.52 |       |                             |      |
| Appropriate adjustment  | Yes                    | 3                             | 19723404                      | 1.26           | 1.09        | 1.47                 | 0.43 |       |                             |      |
|                         | No                     | 2                             | 53453                         | 1.99           | 0.65        | 6.09                 |      |       |                             |      |

| Categories            | Predictor                    | Subgroup factor               |                               | No. of studies                | Sample size | Adjusted OR & 95% CI |        |      | Test of interaction p-value |      |
|-----------------------|------------------------------|-------------------------------|-------------------------------|-------------------------------|-------------|----------------------|--------|------|-----------------------------|------|
| Psychological factors | Substance use disorder (SUD) | Timing                        | Curent SUD                    | 12                            | 1143838     | 2.62                 | 2.09   | 3.27 | 0.01                        |      |
|                       |                              |                               | Hx of SUD                     | 4                             | 46628       | 1.47                 | 1.03   | 2.09 |                             |      |
|                       |                              | Overdose type                 | Fatal overdose                | 5                             | 192495      | 2.22                 | 1.85   | 2.65 | 0.84                        |      |
|                       |                              |                               | Non-fatal overdose            | 6                             | 930454      | 2.35                 | 1.70   | 3.26 |                             |      |
|                       |                              |                               | Mixed                         | 5                             | 67517       | 2.47                 | 1.74   | 3.51 |                             |      |
|                       |                              |                               | Intentional vs. unintentional | Intentional                   | 1*          | 123946               | 2.00   | 1.44 | 2.78                        | 0.75 |
|                       |                              | Intentional vs. unintentional | Unintentional                 | 5                             | 197490      | 2.47                 | 1.54   | 3.97 |                             |      |
|                       |                              |                               | Mixed                         | 11                            | 992976      | 2.23                 | 1.72   | 2.90 |                             |      |
|                       |                              |                               | Type of chronic pain          | Cancer                        | 1           | 36803                | 3.08   | 1.73 | 5.50                        | 0.58 |
|                       |                              | Type of chronic pain          | CNCP                          | 12                            | 1106483     | 2.38                 | 1.92   | 2.97 |                             |      |
|                       |                              |                               | Mixed                         | 3                             | 47180       | 1.87                 | 0.85   | 4.10 |                             |      |
|                       |                              |                               | Representativeness            | No                            | 7           | 837995               | 2.20   | 1.57 | 3.09                        | 0.61 |
|                       |                              | Representativeness            | Yes                           | 9                             | 352471      | 2.46                 | 1.91   | 3.17 |                             |      |
|                       |                              |                               | Validated measure             | Yes                           | 8           | 294406               | 2.47   | 1.96 | 3.11                        | 0.54 |
|                       |                              | Validated measure             | No                            | 8                             | 896060      | 2.12                 | 1.39   | 3.24 |                             |      |
|                       |                              |                               | Appropriate adjustment        | Yes                           | 11          | 1162512              | 2.16   | 1.59 | 2.94                        | 0.22 |
|                       |                              | Appropriate adjustment        | No                            | 5                             | 62791       | 1.68                 | 1.30   | 2.18 |                             |      |
|                       |                              |                               | Depression or Antidepressants | Depression or Antidepressants | Depression  | 6                    | 413289 | 2.37 | 1.52                        | 3.68 |
|                       |                              | Depression or Antidepressants | Timing                        | Antidepressants               | 7           | 340136               | 1.44   | 1.29 | 1.61                        |      |
|                       |                              |                               |                               | Current                       | 4           | 252288               | 2.88   | 1.84 | 4.50                        | 0.15 |
|                       |                              | Overdose type                 | Overdose type                 | Prior                         | 5           | 195928               | 1.80   | 1.14 | 2.86                        |      |
|                       |                              |                               |                               | Fatal overdose                | 2           | 34661                | 1.44   | 1.27 | 1.64                        | 0.31 |
|                       |                              |                               |                               | Non-fatal overdose            | 5           | 403349               | 2.57   | 1.74 | 3.80                        |      |
|                       |                              | Intentional vs. unintentional | Intentional vs. unintentional | Mixed                         | 2           | 10206                | 2.41   | 1.51 | 3.86                        |      |
| Intentional           | 1                            |                               |                               | 98140                         | 3.61        | 2.76                 | 4.72   | 0.08 |                             |      |
| Unintentional         | 3                            |                               |                               | 98340                         | 1.80        | 0.98                 | 3.30   | 0.6  |                             |      |
| Type of chronic pain  | Type of chronic pain         | Mixed                         | 5                             | 251736                        | 2.29        | 1.19                 | 4.41   |      |                             |      |
|                       |                              | CNCP                          | 7                             | 403063                        | 2.20        | 1.32                 | 3.67   | 0.96 |                             |      |
|                       |                              | Mixed                         | 2                             | 45153                         | 2.25        | 1.17                 | 4.33   |      |                             |      |
| Representativeness    | Representativeness           | No                            | 3                             | 62440                         | 1.56        | 1.03                 | 2.34   | 0.10 |                             |      |
|                       |                              | Yes                           | 6                             | 385776                        | 2.56        | 1.68                 | 3.89   |      |                             |      |
| Validated measure     | Validated measure            | Yes                           | 5                             | 169233                        | 2.31        | 1.46                 | 3.66   | 0.82 |                             |      |

| Categories | Predictor                                    | Subgroup factor               |                    | No. of studies | Sample size | Adjusted OR & 95% CI |      |       | Test of interaction p-value |
|------------|----------------------------------------------|-------------------------------|--------------------|----------------|-------------|----------------------|------|-------|-----------------------------|
|            |                                              |                               | No                 | 4              | 278983      | 2.09                 | 1.00 | 4.35  |                             |
|            |                                              | Appropriate adjustment        | Yes                | 5              | 294411      | 2.46                 | 1.64 | 3.68  | 0.54                        |
|            |                                              |                               | No                 | 4              | 153805      | 1.95                 | 1.07 | 3.58  |                             |
|            |                                              |                               | No                 | 3              | 108346      | 3.17                 | 2.39 | 4.21  |                             |
|            | Any mental health disorders                  | Timing                        | Current            | 10             | 507175      | 2.31                 | 1.69 | 3.16  | 0.67                        |
|            |                                              |                               | Prior              | 5              | 195928      | 1.79                 | 1.13 | 2.84  |                             |
|            |                                              |                               | Mixed              | 2              | 869097      | 2.08                 | 1.61 | 2.70  |                             |
|            |                                              | Overdose type                 | Fatal overdose     | 4              | 183223      | 1.84                 | 1.48 | 2.29  | 0.18 <sup>†</sup>           |
|            |                                              |                               | Non-fatal overdose | 8              | 1321460     | 1.82                 | 1.33 | 2.49  | 0.03                        |
|            |                                              |                               | Mixed              | 5              | 67517       | 2.29                 | 1.89 | 2.78  | <0.001                      |
|            |                                              | Intentional vs. unintentional | Intentional        | 2              | 222086      | 2.96                 | 1.98 | 4.41  | 0.19                        |
|            |                                              |                               | Unintentional      | 8              | 1119774     | 1.90                 | 1.46 | 2.46  |                             |
|            |                                              |                               | Mixed              | 8              | 354286      | 2.21                 | 1.44 | 3.38  |                             |
|            |                                              | Type of chronic pain          | Cancer             | 1              | 36803       | 1.68                 | 0.95 | 2.99  | 0.70                        |
|            |                                              |                               | CNCP               | 14             | 1490244     | 2.18                 | 1.75 | 2.72  | 0.82                        |
|            |                                              |                               | Mixed              | 2              | 45153       | 1.94                 | 0.76 | 4.957 |                             |
|            |                                              | Representativeness            | No                 | 7              | 263791      | 1.60                 | 1.26 | 2.03  | 0.06 <sup>†</sup>           |
|            |                                              |                               | Yes                | 10             | 1308409     | 2.48                 | 1.94 | 3.18  |                             |
|            | Validated measure                            | Yes                           | 8                  | 366809         | 2.01        | 1.45                 | 2.79 | 0.68  |                             |
|            |                                              | No                            | 9                  | 1205391        | 2.21        | 1.62                 | 3.02 |       |                             |
|            | Appropriate adjustment                       | Yes                           | 12                 | 1369381        | 2.27        | 1.81                 | 2.85 | 0.33  |                             |
|            |                                              | No                            | 5                  | 202819         | 1.77        | 1.14                 | 2.77 |       |                             |
|            | Psychotic disorders or use of antipsychotics | Type of mental disorders      | Current            | 4              | 375968      | 1.73                 | 1.11 | 2.68  | 0.39                        |
|            |                                              |                               | Prior              | 2              | 34661       | 1.22                 | 1.00 | 1.49  |                             |
|            |                                              | Overdose type                 | Fatal overdose     | 3              | 158607      | 1.61                 | 1.00 | 2.61  | 0.96                        |
|            |                                              |                               | Non-fatal overdose | 3              | 252022      | 1.58                 | 0.96 | 2.61  |                             |
|            |                                              | Type of chronic pain          | CNCP               | 3              | 241530      | 1.71                 | 0.94 | 3.103 | 0.61                        |
|            |                                              |                               | Mixed              | 3              | 169099      | 1.44                 | 1.06 | 1.95  |                             |
|            |                                              | Representativeness            | No                 | 2              | 132933      | 1.71                 | 0.94 | 3.13  | 0.78                        |
|            |                                              |                               | Yes                | 4              | 277696      | 1.55                 | 1.01 | 2.36  |                             |
|            |                                              | Validated measure             | Yes                | 4              | 194773      | 1.38                 | 1.08 | 1.76  | 0.43                        |
|            |                                              |                               | No                 | 2              | 215856      | 1.83                 | 0.95 | 3.55  |                             |

| Categories      | Predictor                     | Subgroup factor               |                                        | No. of studies | Sample size | Adjusted OR & 95% CI |      |       | Test of interaction p-value |
|-----------------|-------------------------------|-------------------------------|----------------------------------------|----------------|-------------|----------------------|------|-------|-----------------------------|
|                 | Tobacco use or use disorder   | Type                          | Smoking status (current smoker vs not) | 2              | 108080      | 1.75                 | 1.34 | 2.287 | 0.66                        |
|                 |                               |                               | Tobacco use or use disorder            | 3              | 57311       | 1.67                 | 1.33 | 2.09  |                             |
|                 |                               |                               | Tobacco Use Disorder                   | 2              | 45153       | 1.44                 | 1.03 | 2.01  |                             |
|                 |                               | Overdose type                 | Non-fatal overdose                     | 3              | 143293      | 1.55                 | 1.21 | 1.98  | 0.75                        |
|                 |                               |                               | Mixed                                  | 4              | 67251       | 1.63                 | 1.32 | 2.01  |                             |
|                 |                               | Intentional vs. unintentional | Intentional                            | 1              | 98140       | 1.86                 | 1.38 | 2.51  | 0.55                        |
|                 |                               |                               | Unintentional                          | 3              | 48928       | 1.50                 | 1.18 | 1.91  | 0.73                        |
|                 |                               |                               | Mixed                                  | 3              | 63476       | 1.60                 | 1.23 | 2.09  |                             |
|                 |                               | Type of chronic pain          | CNCP                                   | 5              | 165391      | 1.70                 | 1.43 | 2.02  | 0.39                        |
|                 |                               |                               | Mixed                                  | 2              | 45153       | 1.44                 | 1.03 | 2.01  |                             |
|                 |                               | Representativeness            | No                                     | 2              | 12762       | 1.38                 | 1.00 | 1.91  | 0.23                        |
|                 |                               |                               | Yes                                    | 5              | 197782      | 1.69                 | 1.55 | 1.86  |                             |
|                 |                               | Validated measure             | Yes                                    | 2              | 134306      | 1.71                 | 1.55 | 1.88  | 0.08                        |
|                 |                               |                               | No                                     | 5              | 76238       | 1.43                 | 1.20 | 1.70  |                             |
|                 | Anxiety                       | Type of chronic pain          | CNCP                                   | 2              | 102201      | 1.12                 | 0.87 | 1.45  | 0.33                        |
|                 |                               |                               | Mixed                                  | 3              | 169099      | 1.36                 | 1.03 | 1.79  |                             |
|                 |                               | Validated measure             | Yes                                    | 3              | 209126      | 1.37                 | 1.05 | 1.79  | 0.26                        |
|                 |                               |                               | No                                     | 2              | 62174       | 1.11                 | 0.87 | 1.41  |                             |
|                 |                               | Appropriate adjustment        | Yes                                    | 2              | 102201      | 1.12                 | 0.87 | 1.45  | 0.33                        |
|                 |                               |                               | No                                     | 3              | 169099      | 1.36                 | 1.03 | 1.79  |                             |
|                 | PTSD                          | Type of chronic pain          | CNCP                                   | 2              | 102201      | 1.31                 | 0.48 | 3.551 | 0.55                        |
|                 |                               |                               | Mixed                                  | 3              | 169099      | 0.96                 | 0.81 | 1.134 |                             |
|                 |                               | Validated measure             | Yes                                    | 3              | 209126      | 1.18                 | 0.69 | 2.01  | 0.52                        |
|                 |                               |                               | No                                     | 2              | 62174       | 0.98                 | 0.77 | 1.23  |                             |
|                 |                               | Appropriate adjustment        | Yes                                    | 3              | 169099      | 0.96                 | 0.81 | 1.13  | 0.55                        |
|                 |                               |                               | No                                     | 2              | 102201      | 1.31                 | 0.48 | 3.55  |                             |
| Medical factors | History of non-fatal overdose | Validated measure             | Yes                                    | 2              | 98406       | 6.76                 | 0.78 | 58.94 | 0.79                        |
|                 |                               |                               | No                                     | 2              | 869097      | 4.98                 | 3.42 | 7.27  |                             |
|                 |                               | Appropriate adjustment        | Yes                                    | 2              | 869097      | 4.98                 | 3.42 | 7.27  | 0.79                        |

| Categories | Predictor           | Subgroup factor               |                    | No. of studies | Sample size | Adjusted OR & 95% CI |      |       | Test of interaction p-value |
|------------|---------------------|-------------------------------|--------------------|----------------|-------------|----------------------|------|-------|-----------------------------|
|            |                     |                               | No                 | 2              | 98406       | 6.76                 | 0.78 | 58.94 |                             |
|            | Injury & acute pain | Overdose type                 | Fatal overdose     | 2              | 148562      | 1.28                 | 0.96 | 1.70  | 0.31                        |
|            |                     |                               | Non-fatal overdose | 2              | 45153       | 1.44                 | 1.26 | 1.63  | 0.47                        |
|            |                     |                               | Mixed              | 1              | 9940        | 2.52                 | 1.09 | 5.84  |                             |
|            |                     | Type of chronic pain          | Cancer             | 1              | 36803       | 0.94                 | 0.50 | 1.77  | 0.39                        |
|            |                     |                               | CNCP               | 2              | 121699      | 1.62                 | 0.95 | 2.76  | 0.67                        |
|            |                     |                               | Mixed              | 2              | 45153       | 1.44                 | 1.26 | 1.63  |                             |
|            |                     | Representativeness            | No                 | 3              | 157549      | 1.43                 | 1.17 | 1.74  | 0.68                        |
|            |                     |                               | Yes                | 2              | 46106       | 1.61                 | 0.96 | 2.68  |                             |
|            |                     | Validated measure             | Yes                | 3              | 184728      | 1.37                 | 1.27 | 1.48  | 0.15                        |
|            |                     |                               | No                 | 2              | 18927       | 1.66                 | 1.30 | 2.14  |                             |
|            | Renal disease       | Overdose type                 | Non-fatal overdose | 3              | 672544      | 1.64                 | 1.30 | 2.08  | 0.14 <sup>†</sup>           |
|            |                     |                               | Mixed              | 2              | 53536       | 1.00                 | 0.88 | 1.14  |                             |
|            |                     | Intentional vs. unintentional | Unintentional      | 2              | 45153       | 1.14                 | 1.01 | 1.30  | 0.13 <sup>†</sup>           |
|            |                     |                               | Mixed              | 3              | 680927      | 1.11                 | 0.90 | 1.36  |                             |
|            |                     | Type of chronic pain          | CNCP               | 3              | 680927      | 1.11                 | 0.90 | 1.36  | 0.13 <sup>†</sup>           |
|            |                     |                               | Mixed              | 2              | 45153       | 1.14                 | 1.01 | 1.30  |                             |
|            |                     | Representativeness            | No                 | 2              | 636378      | 1.47                 | 1.18 | 1.84  | 0.54                        |
|            |                     |                               | Yes                | 3              | 89702       | 1.25                 | 0.79 | 1.99  |                             |
|            |                     | Validated measure             | Yes                | 2              | 663557      | 1.62                 | 1.14 | 2.30  | 0.18                        |
|            |                     |                               | No                 | 3              | 62523       | 1.18                 | 0.86 | 1.61  |                             |
|            | COPD                | Overdose type                 | Non-fatal overdose | 5              | 1541641     | 1.44                 | 1.33 | 1.56  | 0.16 <sup>†</sup>           |
|            |                     |                               | Mixed              | 3              | 53802       | 0.97                 | 0.79 | 1.20  |                             |
|            |                     | Intentional vs. unintentional | Unintentional      | 4              | 914250      | 1.50                 | 1.41 | 1.59  | 0.07 <sup>†</sup>           |
|            |                     |                               | Mixed              | 4              | 681193      | 1.10                 | 0.94 | 1.29  |                             |
|            |                     | Type of chronic pain          | CNCP               | 6              | 1550290     | 1.24                 | 1.05 | 1.47  | 0.08                        |
|            |                     |                               | Mixed              | 2              | 45153       | 1.48                 | 1.34 | 1.62  |                             |
|            |                     | Representativeness            | No                 | 3              | 636644      | 1.27                 | 0.99 | 1.62  | 0.61                        |
|            |                     |                               | Yes                | 5              | 958799      | 1.36                 | 1.20 | 1.55  |                             |
|            |                     | Validated measure             | Yes                | 3              | 663823      | 1.29                 | 1.04 | 1.61  | 0.79                        |
|            |                     |                               | No                 | 5              | 931620      | 1.34                 | 1.14 | 1.57  |                             |

| Categories             | Predictor                     | Subgroup factor               | No. of studies | Sample size | Adjusted OR & 95% CI |      |      | Test of interaction p-value |      |
|------------------------|-------------------------------|-------------------------------|----------------|-------------|----------------------|------|------|-----------------------------|------|
| Liver diseases         | Appropriate adjustment        | Yes                           | 6              | 967786      | 1.39                 | 1.24 | 1.55 | 0.29                        |      |
|                        |                               | No                            | 2              | 627657      | 1.03                 | 0.60 | 1.77 |                             |      |
|                        | Overdose type                 | Non-fatal overdose            | 3              | 672544      | 1.26                 | 1.15 | 1.39 | 0.20                        |      |
|                        |                               | Mixed                         | 3              | 53802       | 0.98                 | 0.68 | 1.43 |                             |      |
|                        | Intentional vs. unintentional | Unintentional                 | 2              | 45153       | 1.39                 | 1.09 | 1.78 | 0.32                        |      |
|                        |                               | Mixed                         | 4              | 681193      | 1.22                 | 1.10 | 1.35 |                             |      |
|                        | Type of chronic pain          | CNCP                          | 4              | 681193      | 1.22                 | 1.10 | 1.35 | 0.32                        |      |
|                        |                               | Mixed                         | 2              | 45153       | 1.39                 | 1.09 | 1.78 |                             |      |
|                        | Representativeness            | No                            | 3              | 636644      | 1.34                 | 0.91 | 1.96 | 0.70                        |      |
|                        |                               | Yes                           | 3              | 89702       | 1.22                 | 0.96 | 1.56 |                             |      |
|                        | Validated measure             | Yes                           | 3              | 663823      | 1.25                 | 1.13 | 1.38 | 0.69                        |      |
|                        |                               | No                            | 3              | 62523       | 1.18                 | 0.89 | 1.56 |                             |      |
|                        | Appropriate adjustment        | Yes                           | 4              | 98689       | 1.27                 | 1.03 | 1.56 | 0.82                        |      |
|                        |                               | No                            | 2              | 627657      | 1.24                 | 1.11 | 1.37 |                             |      |
|                        | Cancer                        | Intentional vs. unintentional | Intentional    | 1*          | 123946               | 0.94 | 0.64 | 1.39                        | 0.52 |
|                        |                               |                               | Unintentional  | 3           | 156912               | 1.13 | 0.99 | 1.28                        | 0.52 |
| Mixed                  |                               |                               | 2              | 629418      | 1.26                 | 0.91 | 1.75 |                             |      |
| Type of chronic pain   |                               | CNCP                          | 2              | 739150      | 1.23                 | 0.86 | 1.74 | 0.70                        |      |
|                        |                               | Mixed                         | 3              | 47180       | 1.14                 | 0.99 | 1.30 |                             |      |
| Representativeness     |                               | No                            | 3              | 748137      | 1.28                 | 1.05 | 1.55 | 0.20                        |      |
|                        |                               | Yes                           | 2              | 38193       | 1.09                 | 0.93 | 1.27 |                             |      |
| Validated measure      |                               | Yes                           | 3              | 775316      | 1.19                 | 0.95 | 1.49 | 0.98                        |      |
|                        |                               | No                            | 2              | 11014       | 1.20                 | 0.94 | 1.52 |                             |      |
| Appropriate adjustment |                               | Yes                           | 3              | 156912      | 1.13                 | 0.99 | 1.28 | 0.52                        |      |
|                        | No                            | 2                             | 629418         | 1.26        | 0.91                 | 1.75 |      |                             |      |
| Headache               | Overdose type                 | Fatal overdose                | 2              | 148562      | 0.98                 | 0.72 | 1.33 | 0.29                        |      |
|                        |                               | Non-fatal overdose            | 4              | 305209      | 1.23                 | 0.95 | 1.60 | 0.27                        |      |
|                        |                               | Mixed                         | 1              | 9940        | 2.18                 | 0.68 | 7.02 |                             |      |
|                        | Intentional vs. unintentional | Intentional                   | 1*             | 123946      | 1.08                 | 0.73 | 1.60 | 0.88                        |      |
|                        |                               | Unintentional                 | 5              | 246902      | 1.22                 | 0.96 | 1.55 | 0.61                        |      |
|                        |                               | Mixed                         | 2              | 216809      | 1.19                 | 0.67 | 2.09 |                             |      |
|                        | Representativeness            | No                            | 4              | 210736      | 1.06                 | 0.84 | 1.34 | 0.32                        |      |

| Categories | Predictor              | Subgroup factor               |                    | No. of studies | Sample size | Adjusted OR & 95% CI |      |      | Test of interaction p-value |
|------------|------------------------|-------------------------------|--------------------|----------------|-------------|----------------------|------|------|-----------------------------|
|            |                        |                               | Yes                | 3              | 252975      | 1.30                 | 0.93 | 1.80 |                             |
|            |                        | Validated measure             | Yes                | 3              | 203655      | 1.18                 | 0.83 | 1.69 | 0.65                        |
|            |                        |                               | No                 | 4              | 206869      | 1.08                 | 0.92 | 1.27 |                             |
|            |                        | Type of chronic pain          | Cancer             | 1              | 36803       | 0.72                 | 0.29 | 1.79 | 0.07                        |
|            |                        |                               | CNCP               | 4              | 121699      | 1.04                 | 0.89 | 1.22 |                             |
|            |                        |                               | Mixed              | 2              | 45153       | 1.45                 | 1.27 | 1.65 |                             |
|            | Neuropathic pain       | Overdose type                 | Fatal overdose     | 2              | 148562      | 0.56                 | 0.28 | 1.14 | 0.15 <sup>†</sup>           |
|            |                        |                               | Non-fatal overdose | 5              | 307236      | 1.21                 | 1.09 | 1.35 |                             |
|            |                        | Intentional vs. unintentional | Intentional        | 1              | 123946      | 1.20                 | 0.77 | 1.87 | 0.61                        |
|            |                        |                               | Unintentional      | 5              | 246902      | 0.96                 | 0.70 | 1.32 | 0.42                        |
|            |                        |                               | Mixed              | 2              | 208896      | 1.19                 | 0.82 | 1.72 |                             |
|            |                        | Type of chronic pain          | Cancer             | 1              | 36803       | 0.21                 | 0.03 | 1.51 | 0.18                        |
|            |                        |                               | CNCP               | 3              | 371815      | 0.90                 | 0.52 | 1.54 | 0.39                        |
|            |                        |                               | Mixed              | 3              | 47180       | 1.16                 | 0.95 | 1.40 |                             |
|            |                        | Representativeness            | No                 | 4              | 210736      | 0.80                 | 0.54 | 1.19 | 0.14 <sup>†</sup>           |
|            |                        |                               | Yes                | 3              | 245062      | 1.27                 | 1.15 | 1.41 |                             |
|            | Validated measure      | Yes                           | 3                  | 184728         | 0.81        | 0.40                 | 1.65 | 0.49 |                             |
|            |                        | No                            | 4                  | 271070         | 1.05        | 0.86                 | 1.28 |      |                             |
|            | Appropriate adjustment | Yes                           | 5                  | 400584         | 1.04        | 0.79                 | 1.36 | 0.80 |                             |
|            |                        | No                            | 2                  | 55214          | 0.95        | 0.52                 | 1.75 |      |                             |
|            | Sleep apnea            | Type of chronic pain          | CNCP               | 3              | 869363      | 1.04                 | 0.88 | 1.23 | 0.36                        |
|            |                        |                               | Mixed              | 2              | 45153       | 1.14                 | 1.01 | 1.30 |                             |
|            |                        | Representativeness            | No                 | 2              | 9253        | 0.77                 | 0.22 | 2.64 | 0.59                        |
|            |                        |                               | Yes                | 3              | 905263      | 1.08                 | 0.99 | 1.17 |                             |
|            |                        | Validated measure             | Yes                | 2              | 36432       | 0.73                 | 0.25 | 2.11 | 0.47                        |
|            |                        |                               | No                 | 3              | 878084      | 1.08                 | 0.99 | 1.19 |                             |
|            | HIV/AIDS               | Overdose type                 | Non-fatal overdose | 3              | 672544      | 1.06                 | 0.86 | 1.31 | 0.84                        |
|            |                        |                               | Mixed              | 2              | 53536       | 1.00                 | 0.59 | 1.69 |                             |
|            |                        | Intentional vs. unintentional | Unintentional      | 2              | 45153       | 1.39                 | 0.80 | 2.42 | 0.26                        |
|            |                        |                               | Mixed              | 3              | 680927      | 1.01                 | 0.90 | 1.14 |                             |
|            |                        | Type of chronic pain          | CNCP               | 3              | 680927      | 1.01                 | 0.90 | 1.14 | 0.26                        |
|            |                        |                               | Mixed              | 2              | 45153       | 1.39                 | 0.80 | 2.42 |                             |



| Categories                    | Predictor                    | Subgroup factor               |                    | No. of studies | Sample size | Adjusted OR & 95% CI |      |      | Test of interaction p-value |      |
|-------------------------------|------------------------------|-------------------------------|--------------------|----------------|-------------|----------------------|------|------|-----------------------------|------|
|                               |                              | Representativeness            | No                 | 2              | 636378      | 1.22                 | 0.67 | 2.23 | 0.67                        |      |
|                               |                              |                               | Yes                | 3              | 89702       | 1.04                 | 0.69 | 1.58 |                             |      |
|                               |                              | Validated measure             | Yes                | 2              | 663557      | 1.01                 | 0.90 | 1.14 | 0.50                        |      |
|                               |                              |                               | No                 | 3              | 62523       | 1.19                 | 0.76 | 1.87 |                             |      |
| Demographic factors           | Age: every 10-year decrement | Overdose type                 | Fatal overdose     | 5              | 341104      | 1.36                 | 0.86 | 2.14 | 0.42                        |      |
|                               |                              |                               | Non-fatal overdose | 10             | 1950878     | 1.24                 | 0.99 | 1.54 |                             |      |
|                               |                              |                               | Mixed              | 3              | 13981       | 1.05                 | 0.86 | 1.28 |                             |      |
|                               |                              | Intentional vs. unintentional | Intentional        | 2*             | 222086      | 1.50                 | 0.92 | 2.46 | 0.08                        |      |
|                               |                              |                               | Unintentional      | 9              | 1270595     | 1.08                 | 1.02 | 1.15 |                             |      |
|                               |                              |                               | Mixed              | 8              | 937228      | 1.31                 | 1.08 | 1.58 |                             |      |
|                               | Type of chronic pain         | Cancer-related chronic pain   | 1                  | 36803          | 1.78        | 0.47                 | 6.66 | 0.13 |                             |      |
|                               |                              | CNCP                          | 14                 | 2221980        | 1.26        | 1.04                 | 1.53 |      |                             |      |
|                               |                              | Mixed                         | 3                  | 47180          | 1.04        | 0.97                 | 1.11 |      |                             |      |
|                               | Representativeness           | No                            | 8                  | 891182         | 1.27        | 1.07                 | 1.50 | 0.60 |                             |      |
|                               |                              | Yes                           | 10                 | 1414781        | 1.17        | 0.93                 | 1.48 |      |                             |      |
|                               | Validated measure            | Yes                           | 9                  | 1142809        | 1.38        | 1.04                 | 1.84 | 0.16 |                             |      |
|                               |                              | No                            | 9                  | 1163154        | 1.13        | 1.08                 | 1.18 |      |                             |      |
|                               |                              | Appropriate adjustment        | Yes                | 10             | 1315845     | 1.13                 | 1.06 |      | 1.20                        | 0.36 |
|                               |                              |                               | No                 | 8              | 990118      | 1.33                 | 0.95 |      | 1.86                        |      |
|                               | Sex: Male vs. Female         | Overdose type                 | Fatal overdose     | 5              | 341104      | 1.38                 | 0.91 | 2.09 | 0.48                        |      |
| Non-fatal overdose            |                              |                               | 10                 | 1950878        | 1.07        | 1.00                 | 1.15 |      |                             |      |
| Mixed                         |                              |                               | 5                  | 67517          | 1.11        | 0.91                 | 1.37 |      |                             |      |
| Intentional vs. unintentional |                              | Intentional                   | 2*                 | 222086         | 0.86        | 0.69                 | 1.07 | 0.07 |                             |      |
|                               |                              | Unintentional                 | 9                  | 1270595        | 1.14        | 1.03                 | 1.26 |      |                             |      |
|                               |                              | Mixed                         | 10                 | 990764         | 1.07        | 0.93                 | 1.23 |      |                             |      |
| Type of chronic pain          |                              | Cancer                        | 1                  | 36803          | 1.58        | 0.44                 | 5.65 | 0.83 |                             |      |
|                               |                              | CNCP                          | 16                 | 2275516        | 1.10        | 1.00                 | 1.22 |      |                             |      |
|                               |                              | Mixed                         | 3                  | 47180          | 1.09        | 1.00                 | 1.18 |      |                             |      |
| Representativeness            |                              | No                            | 8                  | 891182         | 1.08        | 0.92                 | 1.27 | 0.84 |                             |      |
|                               |                              | Yes                           | 12                 | 1468317        | 1.10        | 0.99                 | 1.22 |      |                             |      |
| Validated measure             |                              | Yes                           | 9                  | 1142809        | 1.17        | 1.00                 | 1.37 | 0.35 |                             |      |

| Categories | Predictor               | Subgroup factor               |                    | No. of studies | Sample size | Adjusted OR & 95% CI |      |       | Test of interaction p-value |
|------------|-------------------------|-------------------------------|--------------------|----------------|-------------|----------------------|------|-------|-----------------------------|
|            |                         |                               | No                 | 11             | 1216690     | 1.08                 | 1.02 | 1.15  |                             |
|            |                         | Appropriate adjustment        | Yes                | 12             | 1369381     | 1.11                 | 1.05 | 1.17  | 0.44                        |
|            |                         |                               | No                 | 8              | 990118      | 1.01                 | 0.81 | 1.26  |                             |
|            | Non-married vs. Married | Representativeness            | No                 | 2              | 58001       | 1.28                 | 1.11 | 1.48  | 0.52                        |
|            |                         |                               | Yes                | 2              | 869097      | 1.35                 | 1.27 | 1.42  |                             |
|            | White Race vs. others   | Type of race                  | White              | 10             | 937758      | 1.36                 | 1.04 | 1.77  | 0.19                        |
|            |                         |                               | Hispanic whaite    | 4              | 1026402     | 1.70                 | 1.39 | 2.07  |                             |
|            |                         | Overdose type                 | Fatal overdose     | 3              | 299383      | 1.75                 | 1.24 | 2.46  | 0.07 <sup>†</sup>           |
|            |                         |                               | Non-fatal overdose | 7              | 1607200     | 1.70                 | 1.42 | 2.03  |                             |
|            |                         |                               | Mixed              | 4              | 57577       | 0.88                 | 0.69 | 1.14  |                             |
|            |                         | Intentional vs. unintentional | Intentional        | 1              | 123946      | 1.99                 | 1.31 | 3.01  | 0.27                        |
|            |                         |                               | Unintentional      | 8              | 1231926     | 1.61                 | 1.29 | 2.01  |                             |
|            |                         |                               | Mixed              | 6              | 732234      | 1.30                 | 0.95 | 1.78  |                             |
|            |                         | Type of chronic pain          | Cancer             | 1              | 36803       | 1.34                 | 0.66 | 2.71  | 0.91                        |
|            |                         |                               | CNCP               | 11             | 1918846     | 1.52                 | 1.27 | 1.83  | 0.76                        |
|            |                         |                               | Mixed              | 2              | 8511        | 1.39                 | 0.78 | 2.46  |                             |
|            |                         | Representativeness            | No                 | 8              | 888679      | 1.59                 | 1.24 | 2.05  | 0.47                        |
|            |                         |                               | Yes                | 6              | 1075481     | 1.41                 | 1.13 | 1.75  |                             |
|            |                         | Validated measure             | Yes                | 6              | 976054      | 1.80                 | 1.57 | 2.08  | 0.88 <sup>†</sup>           |
|            |                         |                               | No                 | 8              | 988106      | 1.36                 | 1.07 | 1.73  |                             |
|            |                         | Appropriate adjustment        | Yes                | 8              | 1081454     | 1.32                 | 1.11 | 1.57  | 0.09 <sup>†</sup>           |
|            |                         |                               | No                 | 6              | 882706      | 1.86                 | 1.46 | 2.39  |                             |
|            | West vs. Northeast      | Type of chronic pain          | CNCP               | 4              | 508574      | 1.33                 | 0.97 | 1.84  | 0.43                        |
|            |                         |                               | Mixed              | 2              | 15071       | 1.54                 | 1.32 | 1.79  |                             |
|            |                         | Intentional vs. unintentional | Unintentional      | 4              | 425806      | 1.54                 | 1.38 | 1.71  | 0.05                        |
|            |                         |                               | Mixed              | 2              | 97839       | 1.00                 | 0.84 | 1.19  |                             |
|            |                         | Representativeness            | No                 | 2              | 3068        | 1.79                 | 1.30 | 2.46  | 0.19                        |
|            |                         |                               | Yes                | 4              | 520577      | 1.36                 | 1.08 | 1.73  |                             |
|            |                         | Validated measure             | Yes                | 2              | 12143       | 1.48                 | 1.29 | 1.693 | 0.82                        |
|            |                         |                               | No                 | 4              | 511502      | 1.43                 | 1.05 | 1.933 |                             |
|            | Midwest vs. Northeast   | Intentional vs. unintentional | Unintentional      | 3              | 322289      | 1.21                 | 1.09 | 1.34  | 0.97                        |
|            |                         |                               | Mixed              | 2              | 72682       | 1.20                 | 0.87 | 1.65  |                             |

| Categories | Predictor             | Subgroup factor               |                    | No. of studies     | Sample size | Adjusted OR & 95% CI |      |       | Test of interaction p-value |
|------------|-----------------------|-------------------------------|--------------------|--------------------|-------------|----------------------|------|-------|-----------------------------|
|            |                       | Validated measure             | Yes                | 2                  | 17410       | 1.22                 | 1.09 | 1.362 | 0.66                        |
|            |                       |                               | No                 | 3                  | 377561      | 1.15                 | 0.93 | 1.435 |                             |
|            | South vs. Northeast   | Intentional vs. unintentional | Unintentional      | 4                  | 689096      | 1.12                 | 1.01 | 1.23  | 0.35                        |
|            |                       |                               | Mixed              | 2                  | 157798      | 1.00                 | 0.81 | 1.23  |                             |
|            |                       | Type of chronic pain          | CNCP               | 4                  | 820049      | 1.06                 | 0.90 | 1.24  | 0.63                        |
|            |                       |                               | Mixed              | 2                  | 26845       | 1.11                 | 1.00 | 1.23  |                             |
|            |                       | Representativeness            | No                 | 2                  | 4586        | 1.19                 | 0.88 | 1.62  | 0.57                        |
|            |                       |                               | Yes                | 4                  | 842308      | 1.09                 | 0.99 | 1.19  |                             |
|            |                       | Validated measure             | Yes                | 2                  | 22577       | 1.19                 | 0.88 | 1.619 | 0.89                        |
|            |                       |                               | No                 | 4                  | 824317      | 1.09                 | 0.99 | 1.189 |                             |
|            | Urban vs. rural areas | Overdose type                 | Fatal overdose     | 2                  | 183270      | 1.03                 | 0.85 | 1.26  | 0.67                        |
|            |                       |                               |                    | Non-fatal overdose | 3           | 922284               | 1.09 | 0.94  | 1.27                        |
|            |                       | Validated measure             | Yes                | 2                  | 183270      | 1.03                 | 0.85 | 1.26  | 0.67                        |
|            |                       |                               | No                 | 3                  | 922284      | 1.09                 | 0.94 | 1.266 |                             |
|            |                       | Appropriate adjustment        | Yes                | 3                  | 901546      | 1.07                 | 0.92 | 1.24  | 0.99                        |
|            |                       |                               | No                 | 2                  | 204008      | 1.07                 | 0.89 | 1.29  |                             |
|            | Overweight            | Overdose type                 | Non-fatal overdose | 3                  | 143293      | 0.95                 | 0.62 | 1.47  | 0.83                        |
|            |                       |                               |                    | Mixed              | 2           | 53536                | 1.00 | 0.89  | 1.13                        |
|            |                       | Intentional vs. unintentional | Intentional        | 1*                 | 111312      | 0.61                 | 0.46 | 0.79  | 0.35                        |
|            |                       |                               | Unintentional      | 2                  | 45153       | 1.23                 | 1.08 | 1.39  |                             |
|            |                       | Type of chronic pain          | Mixed              | 2                  | 53536       | 1.00                 | 0.89 | 1.13  |                             |
|            |                       |                               | CNCP               | 3                  | 151676      | 0.86                 | 0.63 | 1.16  | 0.15                        |
|            |                       | Validated measure             | Mixed              | 2                  | 45153       | 1.23                 | 1.08 | 1.39  |                             |
|            |                       |                               | Yes                | 2                  | 134306      | 0.88                 | 0.43 | 1.81  | 0.70                        |
|            |                       |                               | No                 | 3                  | 62523       | 1.02                 | 0.91 | 1.14  |                             |

OR: odds ratio, 95%CI: 95% confidence interval; CNCP: chronic noncancer pain, SUD: substance use disorder; PTSD: Post-traumatic stress disorder

# No subgroup analysis for those predictors or subgroup factors when there are less than 2 studies in a given subgroup.

\* One study (Ilgen 2016) that reported intentional overdose had overlapped study population with study Bohnert 2011 for unintentional overdose subgroup.

† p-values from multivariable meta-regression.

**eTable 16 Sensitivity analyses to test robustness of results <sup>\*,#</sup>**

| Predictor name                      | Approaches                                  | No. of studies | Sample size | Adjusted OR & 95%CI |       |       |
|-------------------------------------|---------------------------------------------|----------------|-------------|---------------------|-------|-------|
| Opioid dose (every 90-mg increment) | Primary analysis                            | 14             | 1315173     | 2.57                | 2.08  | 3.18  |
|                                     | Dose reported as continuous data            | 1              | 627391      | 2.41                | 2.23  | 2.60  |
|                                     | One-stage dose response analysis            | 13             | 687782      | 2.61                | 2.03  | 3.36  |
|                                     | Adjusted OR                                 | 6              | 689357      | 2.57                | 2.06  | 3.20  |
|                                     | Adjusted HR                                 | 7              | 616544      | 2.99                | 2.09  | 4.27  |
|                                     | Adjusted RR                                 | 1              | 9272        | 1.26                | 0.89  | 1.80  |
|                                     | 100% Chronic pain                           | 10             | 640417      | 2.90                | 2.07  | 4.07  |
|                                     | Chronic pain<100%                           | 4              | 674756      | 2.08                | 1.53  | 2.82  |
| Long- vs short-acting opioids       | Primary analysis                            | 9              | 978745      | 1.92                | 1.51  | 2.45  |
|                                     | Adjusted data reported (without imputation) | 9              | 978745      | 1.92                | 1.51  | 2.45  |
|                                     | Adjusted OR                                 | 6              | 104593      | 1.66                | 1.32  | 2.07  |
|                                     | Adjusted HR                                 | 3              | 874152      | 2.74                | 1.92  | 3.91  |
|                                     | 100% Chronic pain                           | 5              | 880056      | 1.83                | 1.29  | 2.59  |
|                                     | Chronic pain<100%                           | 4              | 98689       | 2.07                | 1.32  | 3.23  |
| Duration of opioid use              | Primary analysis                            | 2              | 153033      | 1.01                | 1.003 | 1.03  |
|                                     | Adjusted data reported (without imputation) | 2              | 153033      | 1.01                | 1.003 | 1.03  |
|                                     | Adjusted OR                                 | 1              | 2212        | 1.01                | 1.00  | 1.03  |
|                                     | Adjusted HR                                 | 1              | 150821      | 1.26                | 1.06  | 1.51  |
|                                     | 100% Chronic pain                           | 2              | 153033      | 1.01                | 1.003 | 1.03  |
| Number of pharmacies                | Primary analysis                            | 2              | 639823      | 4.92                | 4.35  | 5.57  |
|                                     | Adjusted data reported (without imputation) | 2              | 639823      | 4.92                | 4.35  | 5.57  |
|                                     | Adjusted OR                                 | 2              | 639823      | 4.92                | 4.35  | 5.57  |
|                                     | 100% Chronic pain                           | 1              | 12432       | 6.00                | 4.37  | 8.24  |
|                                     | Chronic pain<100%                           | 1              | 627391      | 4.75                | 4.15  | 5.44  |
| Number of prescribers               | Primary analysis                            | 3              | 790644      | 4.68                | 3.57  | 6.12  |
|                                     | Adjusted data reported (without imputation) | 3              | 790644      | 4.68                | 3.57  | 6.12  |
|                                     | Adjusted OR                                 | 2              | 639823      | 4.98                | 3.04  | 8.16  |
|                                     | Adjusted HR                                 | 1              | 150821      | 4.26                | 3.46  | 5.25  |
|                                     | 100% Chronic pain                           | 2              | 163253      | 5.228               | 3.459 | 7.903 |
|                                     | Chronic pain<100%                           | 1              | 627391      | 3.923               | 3.581 | 4.298 |
| Use of benzodiazepines              | Primary analysis                            | 12             | 1246864     | 1.79                | 1.46  | 2.19  |
|                                     | Adjusted data reported (without imputation) | 12             | 1246864     | 1.79                | 1.46  | 2.19  |

| Predictor name               | Approaches                                  | No. of studies | Sample size | Adjusted OR & 95%CI |       |       |
|------------------------------|---------------------------------------------|----------------|-------------|---------------------|-------|-------|
|                              | Adjusted OR                                 | 8              | 973690      | 1.53                | 1.26  | 1.87  |
|                              | Adjusted HR                                 | 3              | 263902      | 2.39                | 1.84  | 3.11  |
|                              | Adjusted RR                                 | 1              | 9272        | 2.97                | 2.41  | 3.66  |
|                              | 100% Chronic pain                           | 10             | 1201711     | 1.84                | 1.38  | 2.44  |
|                              | Chronic pain<100%                           | 2              | 45153       | 1.61                | 1.29  | 2.02  |
| Sedatives and hypnotics      | Primary analysis                            | 6              | 337924      | 1.37                | 1.2   | 1.56  |
|                              | Adjusted data reported (without imputation) | 6              | 337924      | 1.37                | 1.20  | 1.56  |
|                              | Adjusted OR                                 | 4              | 98606       | 1.31                | 1.08  | 1.59  |
|                              | Adjusted HR                                 | 2              | 239318      | 1.53                | 1.28  | 1.83  |
|                              | 100% Chronic pain                           | 4              | 292771      | 1.51                | 1.20  | 1.90  |
|                              | Chronic pain<100%                           | 2              | 45153       | 1.29                | 1.10  | 1.50  |
| Muscle relaxants             | Primary analysis                            | 5              | 19776855    | 1.28                | 1.10  | 1.50  |
|                              | Adjusted data reported (without imputation) | 5              | 19776855    | 1.28                | 1.10  | 1.50  |
|                              | Adjusted OR                                 | 4              | 98606       | 1.31                | 1.06  | 1.63  |
|                              | Adjusted HR                                 | 1              | 19678250    | 1.21                | 1.00  | 1.47  |
|                              | 100% Chronic pain                           | 3              | 19731702    | 1.35                | 0.97  | 1.87  |
|                              | Chronic pain<100%                           | 2              | 45153       | 1.27                | 1.01  | 1.60  |
| Use of non-opioid analgesics | Primary analysis                            | 3              | 98340       | 0.79                | 0.58  | 1.09  |
|                              | Adjusted data reported (without imputation) | 3              | 98340       | 0.79                | 0.58  | 1.09  |
|                              | Adjusted OR                                 | 1              | 266         | 0.97                | 0.41  | 2.29  |
|                              | 100% Chronic pain                           | 1              | 53187       | 0.977               | 0.688 | 1.388 |
|                              | Chronic pain<100%                           | 2              | 45153       | 0.73                | 0.51  | 1.06  |
|                              |                                             |                |             |                     |       |       |
| NSAIDs                       | Primary analysis                            | 3              | 104920      | 0.94                | 0.78  | 1.14  |
|                              | Adjusted data reported (without imputation) | 3              | 104920      | 0.94                | 0.78  | 1.14  |
|                              | Adjusted OR                                 | 2              | 6780        | 1.04                | 0.90  | 1.19  |
|                              | Adjusted HR                                 | 1              | 98140       | 0.81                | 0.64  | 1.02  |
|                              | 100% Chronic pain                           | 2              | 98406       | 0.82                | 0.66  | 1.02  |
|                              | Chronic pain<100%                           | 1              | 6514        | 1.04                | 0.90  | 1.20  |
| Substance use disorders      | Primary analysis                            | 16             | 1190466     | 2.32                | 1.88  | 2.85  |
|                              | Excluding tobacco use disorders             | 16             | 1190466     | 2.48                | 1.76  | 3.48  |
|                              | Adjusted data reported (without imputation) | 15             | 1188439     | 2.41                | 1.95  | 2.97  |
|                              | Adjusted OR                                 | 6              | 678797      | 2.44                | 1.76  | 3.39  |
|                              | Adjusted HR                                 | 9              | 502397      | 2.20                | 1.53  | 3.16  |
|                              | Adjusted RR                                 | 1              | 9272        | 2.03                | 1.47  | 2.81  |
|                              | 100% Chronic pain                           | 11             | 464386      | 2.04                | 1.47  | 2.83  |
|                              | Chronic pain<100%                           | 5              | 726080      | 2.77                | 2.00  | 3.85  |

| Predictor name                               | Approaches                                  | No. of studies | Sample size | Adjusted OR & 95%CI |      |      |
|----------------------------------------------|---------------------------------------------|----------------|-------------|---------------------|------|------|
| Any mental health disorders                  | Primary analysis                            | 17             | 1572200     | 2.12                | 1.73 | 2.61 |
|                                              | Adjusted data reported (without imputation) | 17             | 1572200     | 2.12                | 1.73 | 2.61 |
|                                              | Adjusted OR                                 | 8              | 973690      | 1.82                | 1.36 | 2.43 |
|                                              | Adjusted HR                                 | 9              | 598510      | 2.43                | 1.78 | 3.32 |
|                                              | 100% Chronic pain                           | 13             | 1473511     | 2.07                | 1.64 | 2.62 |
|                                              | Chronic pain<100%                           | 4              | 98689       | 2.29                | 1.32 | 3.99 |
| Depression or antidepressants                | Primary analysis                            | 9              | 448216      | 2.22                | 1.57 | 3.14 |
|                                              | Adjusted data reported (without imputation) | 9              | 448216      | 2.22                | 1.57 | 3.14 |
|                                              | Adjusted OR                                 | 5              | 100818      | 1.82                | 1.14 | 2.90 |
|                                              | Adjusted HR                                 | 4              | 347398      | 2.85                | 1.75 | 4.66 |
|                                              | 100% Chronic pain                           | 7              | 403063      | 2.20                | 1.32 | 3.67 |
|                                              | Chronic pain<100%                           | 2              | 45153       | 2.25                | 1.17 | 4.33 |
| Bipolar disorder                             | Primary analysis                            | 3              | 98340       | 2.07                | 1.77 | 2.41 |
|                                              | Adjusted data reported (without imputation) | 3              | 98340       | 2.07                | 1.77 | 2.41 |
|                                              | Adjusted OR                                 | 3              | 98340       | 2.07                | 1.77 | 2.41 |
|                                              | 100% Chronic pain                           | 1              | 53187       | 1.76                | 0.54 | 5.77 |
|                                              | Chronic pain<100%                           | 2              | 45153       | 2.02                | 1.61 | 2.53 |
| Psychotic disorders or use of antipsychotics | Primary analysis                            | 6              | 410629      | 1.59                | 1.16 | 2.19 |
|                                              | Adjusted data reported (without imputation) | 6              | 410629      | 1.59                | 1.16 | 2.19 |
|                                              | Adjusted OR                                 | 3              | 47365       | 1.21                | 1.09 | 1.34 |
|                                              | Adjusted HR                                 | 3              | 363264      | 2.45                | 2.06 | 2.92 |
|                                              | 100% Chronic pain                           | 3              | 241530      | 1.71                | 0.94 | 3.10 |
|                                              | Chronic pain<100%                           | 3              | 169099      | 1.44                | 1.06 | 1.95 |
| Tobacco use or use disorder                  | Primary analysis                            | 7              | 210544      | 1.57                | 1.37 | 1.81 |
|                                              | Adjusted data reported (without imputation) | 7              | 210544      | 1.57                | 1.37 | 1.81 |
|                                              | Adjusted OR                                 | 3              | 48928       | 1.50                | 1.18 | 1.91 |
|                                              | Adjusted HR                                 | 4              | 161616      | 1.71                | 1.40 | 2.09 |
|                                              | 100% Chronic pain                           | 4              | 98689       | 1.72                | 1.39 | 2.13 |
|                                              | Chronic pain<100%                           | 3              | 111855      | 1.52                | 1.23 | 1.88 |
| Anxiety                                      | Primary analysis                            | 5              | 271300      | 1.28                | 1.02 | 1.61 |
|                                              | Adjusted data reported (without imputation) | 5              | 271300      | 1.28                | 1.02 | 1.61 |
|                                              | Adjusted OR                                 | 3              | 98340       | 1.34                | 0.96 | 1.86 |
|                                              | Adjusted HR                                 | 2              | 172960      | 1.18                | 0.95 | 1.46 |
|                                              | 100% Chronic pain                           | 2              | 102201      | 1.12                | 0.87 | 1.45 |
|                                              | Chronic pain<100%                           | 3              | 169099      | 1.36                | 1.03 | 1.79 |

| Predictor name      | Approaches                                  | No. of studies | Sample size | Adjusted OR & 95%CI |       |      |
|---------------------|---------------------------------------------|----------------|-------------|---------------------|-------|------|
| PTSD                | Primary analysis                            | 5              | 271300      | 1.08                | 0.78  | 1.5  |
|                     | Adjusted data reported (without imputation) | 5              | 271300      | 1.08                | 0.78  | 1.5  |
|                     | Adjusted OR                                 | 3              | 98340       | 1.00                | 0.83  | 1.19 |
|                     | Adjusted HR                                 | 2              | 172960      | 1.26                | 0.49  | 3.24 |
|                     | 100% Chronic pain                           | 1              | 49014       | 1.31                | 0.48  | 3.55 |
|                     | Chronic pain<100%                           | 3              | 169099      | 0.96                | 0.81  | 1.13 |
| Schizophrenia       | Primary analysis                            | 3              | 98340       | 1.78                | 1.20  | 2.65 |
|                     | Adjusted data reported (without imputation) | 3              | 98340       | 1.78                | 1.20  | 2.65 |
|                     | Adjusted OR                                 | 3              | 98340       | 1.78                | 1.20  | 2.65 |
|                     | 100% Chronic pain                           | 1              | 53187       | 1.20                | 0.16  | 9.00 |
|                     | Chronic pain<100%                           | 2              | 45153       | 1.81                | 1.21  | 2.71 |
| History of overdose | Primary analysis                            | 4              | 967503      | 4.83                | 3.34  | 6.99 |
|                     | Adjusted data reported (without imputation) | 4              | 967503      | 4.83                | 3.34  | 6.99 |
|                     | Adjusted OR                                 | 4              | 967503      | 4.83                | 3.34  | 6.99 |
|                     | 100% Chronic pain                           | 4              | 967503      | 4.83                | 3.34  | 6.99 |
| Injury & acute pain | Primary analysis                            | 5              | 203655      | 1.42                | 1.27  | 1.59 |
|                     | Adjusted data reported (without imputation) | 5              | 203655      | 1.42                | 1.27  | 1.59 |
|                     | Adjusted OR                                 | 2              | 45153       | 1.44                | 1.26  | 1.63 |
|                     | Adjusted HR                                 | 3              | 158502      | 1.38                | 0.93  | 2.04 |
|                     | Chronic pain<100%                           | 5              | 203655      | 1.42                | 1.27  | 1.59 |
| Renal disease       | Primary analysis                            | 5              | 726080      | 1.35                | 1.01  | 1.79 |
|                     | Adjusted data reported (without imputation) | 3              | 672544      | 1.64                | 1.30  | 2.08 |
|                     | Adjusted OR                                 | 3              | 672544      | 1.64                | 1.30  | 2.08 |
|                     | Adjusted HR                                 | 2              | 53536       | 1.00                | 0.88  | 1.14 |
|                     | Chronic pain<100%                           | 5              | 726080      | 1.35                | 1.01  | 1.79 |
| COPD                | Primary analysis                            | 8              | 1595443     | 1.34                | 1.19  | 1.49 |
|                     | Adjusted data reported (without imputation) | 6              | 1541907     | 1.42                | 1.30  | 1.56 |
|                     | Adjusted OR                                 | 6              | 1541907     | 1.422               | 1.295 | 1.56 |
|                     | Adjusted HR                                 | 2              | 53536       | 1.00                | 0.80  | 1.25 |
|                     | 100% Chronic pain                           | 3              | 869363      | 1.44                | 1.22  | 1.71 |
| Liver diseases      | Chronic pain<100%                           | 5              | 726080      | 1.27                | 1.08  | 1.49 |
|                     | Primary analysis                            | 6              | 726346      | 1.24                | 1.13  | 1.36 |

| Predictor name             | Approaches                                  | No. of studies | Sample size | Adjusted OR & 95%CI |      |      |
|----------------------------|---------------------------------------------|----------------|-------------|---------------------|------|------|
|                            | Adjusted data reported (without imputation) | 4              | 672810      | 1.26                | 1.14 | 1.39 |
|                            | Adjusted OR                                 | 4              | 672810      | 1.26                | 1.14 | 1.39 |
|                            | Adjusted HR                                 | 2              | 53536       | 1.00                | 0.68 | 1.47 |
|                            | 100% Chronic pain                           | 1              | 266         | 0.79                | 0.20 | 3.07 |
|                            | Chronic pain<100%                           | 5              | 726080      | 1.25                | 1.13 | 1.37 |
| Neck/Back pain             | Primary analysis                            | 6              | 317176      | 1.12                | 0.97 | 1.28 |
|                            | Adjusted data reported (without imputation) | 5              | 315149      | 1.12                | 0.97 | 1.29 |
|                            | Adjusted OR                                 | 3              | 98340       | 1.17                | 0.99 | 1.39 |
|                            | Adjusted HR                                 | 3              | 218836      | 1.03                | 0.91 | 1.17 |
|                            | 100% Chronic pain                           | 4              | 272023      | 1.02                | 0.90 | 1.15 |
|                            | Chronic pain<100%                           | 2              | 45153       | 1.21                | 1.04 | 1.40 |
| Charlson comorbidity index | Primary analysis                            | 4              | 76174       | 1.14                | 1.02 | 1.27 |
|                            | Adjusted data reported (without imputation) | 4              | 76174       | 1.14                | 1.02 | 1.27 |
|                            | Adjusted OR                                 | 2              | 56962       | 1.25                | 1.16 | 1.35 |
|                            | Adjusted HR                                 | 1              | 9940        | 0.93                | 0.75 | 1.14 |
|                            | Adjusted RR                                 | 1              | 9272        | 1.13                | 1.08 | 1.19 |
|                            | 100% Chronic pain                           | 4              | 76174       | 1.14                | 1.02 | 1.27 |
| Headache                   | Primary analysis                            | 7              | 463711      | 1.18                | 0.95 | 1.47 |
|                            | Adjusted data reported (without imputation) | 7              | 463711      | 1.18                | 0.95 | 1.47 |
|                            | Adjusted OR                                 | 3              | 98340       | 1.46                | 1.32 | 1.61 |
|                            | Adjusted HR                                 | 4              | 365371      | 1.03                | 0.89 | 1.21 |
|                            | 100% Chronic pain                           | 5              | 418558      | 1.03                | 0.88 | 1.21 |
|                            | Chronic pain<100%                           | 2              | 45153       | 1.45                | 1.27 | 1.65 |
| Fibromyalgia               | Primary analysis                            | 3              | 47180       | 1.12                | 1.00 | 1.26 |
|                            | Adjusted data reported (without imputation) | 2              | 45153       | 1.12                | 1.00 | 1.26 |
|                            | Adjusted OR                                 | 2              | 45153       | 1.12                | 1.00 | 1.26 |
|                            | Adjusted HR                                 | 1              | 2027        | 1.00                | 0.53 | 1.87 |
|                            | 100% Chronic pain                           | 1              | 2027        | 1.00                | 0.53 | 1.87 |
|                            | Chronic pain<100%                           | 2              | 45153       | 1.12                | 1.00 | 1.26 |
| Cancer                     | Primary analysis                            | 5              | 786330      | 1.20                | 1.02 | 1.40 |
|                            | Adjusted data reported (without imputation) | 4              | 784303      | 1.22                | 1.03 | 1.45 |
|                            | Adjusted OR                                 | 3              | 672544      | 1.28                | 1.07 | 1.52 |
|                            | Adjusted HR                                 | 2              | 113786      | 0.99                | 0.77 | 1.28 |



| Predictor name                                                  | Approaches                                  | No. of studies   | Sample size | Adjusted OR & 95%CI |      |       |
|-----------------------------------------------------------------|---------------------------------------------|------------------|-------------|---------------------|------|-------|
| Neuropathic pain                                                | 100% Chronic pain                           | 2                | 113786      | 0.99                | 0.77 | 1.28  |
|                                                                 | Chronic pain<100%                           | 3                | 672544      | 1.276               | 1.07 | 1.52  |
|                                                                 | Primary analysis                            | 7                | 455798      | 1.04                | 0.82 | 1.31  |
|                                                                 | Adjusted data reported (without imputation) | 6                | 453771      | 1.03                | 0.80 | 1.33  |
|                                                                 | Adjusted OR                                 | 3                | 98340       | 1.16                | 0.94 | 1.43  |
|                                                                 | Adjusted HR                                 | 3                | 150589      | 0.87                | 0.54 | 1.41  |
| Sleep apnea                                                     | 100% Chronic pain                           | 5                | 410645      | 0.87                | 0.58 | 1.32  |
|                                                                 | Chronic pain<100%                           | 2                | 45153       | 1.16                | 0.92 | 1.47  |
|                                                                 | Primary analysis                            | 5                | 914516      | 1.09                | 0.98 | 1.21  |
|                                                                 | Adjusted data reported (without imputation) | 5                | 914516      | 1.09                | 0.98 | 1.21  |
|                                                                 | Adjusted OR                                 | 5                | 914516      | 1.09                | 0.98 | 1.21  |
|                                                                 | 100% Chronic pain                           | 2                | 45153       | 1.14                | 1.01 | 1.30  |
| HIV/AIDS                                                        | Chronic pain<100%                           | 3                | 869363      | 1.04                | 0.88 | 1.23  |
|                                                                 | Primary analysis                            | 5                | 726080      | 1.03                | 0.91 | 1.15  |
|                                                                 | Adjusted data reported (without imputation) | 3                | 672544      | 1.06                | 0.86 | 1.31  |
|                                                                 | Adjusted OR                                 | 3                | 672544      | 1.06                | 0.86 | 1.31  |
|                                                                 | Adjusted HR                                 | 2                | 53536       | 1.00                | 0.59 | 1.69  |
|                                                                 | Chronic pain<100%                           | 5                | 726080      | 1.03                | 0.91 | 1.15  |
| Number of drugs                                                 | Primary analysis                            | 3                | 132801      | 0.99                | 0.94 | 1.04  |
|                                                                 | Adjusted data reported (without imputation) | 3                | 132801      | 0.99                | 0.94 | 1.04  |
|                                                                 | Adjusted OR                                 | 1                | 2212        | 0.98                | 0.97 | 1.00  |
|                                                                 | Adjusted HR                                 | 2                | 130589      | 0.98                | 0.87 | 1.11  |
|                                                                 | 100% Chronic pain                           | 3                | 132801      | 0.99                | 0.94 | 1.04  |
|                                                                 | Age (every 10-year decrement)               | Primary analysis | 18          | 2305963             | 1.22 | 1.02  |
| Adjusted data reported (without imputation)                     |                                             | 16               | 2303670     | 1.23                | 1.03 | 1.47  |
| Age reported as continuous data only (without categorical data) |                                             | 10               | 1277074     | 1.31                | 1.04 | 1.66  |
| Adjusted OR                                                     |                                             | 8                | 1598869     | 1.10                | 1.07 | 1.14  |
| Adjusted HR                                                     |                                             | 9                | 697822      | 1.32                | 1.04 | 1.67  |
| Adjusted RR                                                     |                                             | 1                | 9272        | 2.57                | 0.58 | 11.35 |
| 100% Chronic pain                                               |                                             | 15               | 1633419     | 1.25                | 1.03 | 1.52  |
| Chronic pain<100%                                               |                                             | 3                | 672544      | 1.07                | 0.90 | 1.26  |
| Primary analysis                                                |                                             | 20               | 2359499     | 1.1                 | 1.01 | 1.19  |

| Predictor name         | Approaches                                  | No. of studies | Sample size | Adjusted OR & 95%CI |       |       |
|------------------------|---------------------------------------------|----------------|-------------|---------------------|-------|-------|
| Sex (male vs. female)  | Adjusted data reported (without imputation) | 17             | 2303936     | 1.10                | 1.01  | 1.20  |
|                        | Adjusted OR                                 | 8              | 1598869     | 1.11                | 1.07  | 1.16  |
|                        | Adjusted HR                                 | 11             | 751358      | 1.15                | 0.95  | 1.39  |
|                        | Adjusted RR                                 | 1              | 9272        | 0.75                | 0.54  | 1.04  |
|                        | 100% Chronic pain                           | 15             | 1633419     | 1.12                | 0.97  | 1.29  |
| Non-married vs Married | Chronic pain<100%                           | 5              | 726080      | 1.10                | 1.01  | 1.19  |
|                        | Primary analysis                            | 4              | 927098      | 1.34                | 1.27  | 1.41  |
|                        | Adjusted data reported (without imputation) | 4              | 927098      | 1.34                | 1.27  | 1.41  |
|                        | Adjusted OR                                 | 3              | 878084      | 1.34                | 1.27  | 1.42  |
|                        | Adjusted HR                                 | 1              | 49014       | 1.15                | 0.83  | 1.59  |
| White race vs others   | 100% Chronic pain                           | 3              | 918111      | 1.34                | 1.27  | 1.42  |
|                        | Chronic pain<100%                           | 1              | 8987        | 1.31                | 1.12  | 1.54  |
|                        | Primary analysis                            | 14             | 1964160     | 1.50                | 1.28  | 1.77  |
|                        | Adjusted data reported (without imputation) | 11             | 1908597     | 1.64                | 1.39  | 1.94  |
|                        | Adjusted OR                                 | 7              | 1560200     | 1.60                | 1.28  | 2.00  |
| West vs Northeast      | Adjusted HR                                 | 7              | 403960      | 1.39                | 1.08  | 1.79  |
|                        | 100% Chronic pain                           | 10             | 1276749     | 1.51                | 1.23  | 1.86  |
|                        | Chronic pain<100%                           | 4              | 687411      | 1.45                | 1.06  | 2.00  |
|                        | Primary analysis                            | 6              | 523645      | 1.43                | 1.16  | 1.76  |
|                        | Adjusted data reported (without imputation) | 6              | 523645      | 1.43                | 1.16  | 1.76  |
| Midwest vs Northeast   | Adjusted OR                                 | 5              | 425876      | 1.54                | 1.38  | 1.71  |
|                        | 100% Chronic pain                           | 4              | 508574      | 1.33                | 0.97  | 1.84  |
|                        | Chronic pain<100%                           | 2              | 15071       | 1.54                | 1.32  | 1.79  |
|                        | Primary analysis                            | 5              | 394971      | 1.21                | 1.09  | 1.33  |
|                        | Adjusted data reported (without imputation) | 5              | 394971      | 1.21                | 1.09  | 1.33  |
| South vs Northeast     | Adjusted OR                                 | 4              | 322376      | 1.206               | 1.088 | 1.337 |
|                        | 100% Chronic pain                           | 4              | 377648      | 1.15                | 0.93  | 1.43  |
|                        | Chronic pain<100%                           | 1              | 17323       | 1.22                | 1.09  | 1.36  |
|                        | Primary analysis                            | 6              | 846894      | 1.09                | 1.004 | 1.19  |
|                        | Adjusted data reported (without imputation) | 6              | 846894      | 1.09                | 1.004 | 1.19  |
|                        | Adjusted OR                                 | 5              | 689255      | 1.115               | 1.014 | 1.226 |
|                        | 100% Chronic pain                           | 2              | 26845       | 1.11                | 1.00  | 1.23  |

| Predictor name       | Approaches                                  | No. of studies | Sample size | Adjusted OR & 95%CI |      |      |
|----------------------|---------------------------------------------|----------------|-------------|---------------------|------|------|
| Urban vs rural areas | Chronic pain<100%                           | 4              | 820049      | 1.06                | 0.90 | 1.24 |
|                      | Primary analysis                            | 5              | 1105554     | 1.07                | 0.95 | 1.20 |
|                      | Adjusted data reported (without imputation) | 4              | 1073105     | 1.08                | 0.95 | 1.22 |
|                      | Adjusted OR                                 | 3              | 922284      | 1.09                | 0.94 | 1.27 |
|                      | Adjusted HR                                 | 2              | 183270      | 1.03                | 0.85 | 1.26 |
| Overweight/obesity   | Primary analysis                            | 5              | 196829      | 0.98                | 0.79 | 1.22 |
|                      | Adjusted data reported (without imputation) | 3              | 143293      | 0.95                | 0.62 | 1.47 |
|                      | Adjusted OR                                 | 2              | 45153       | 1.23                | 1.08 | 1.39 |
|                      | Adjusted HR                                 | 3              | 151676      | 0.86                | 0.63 | 1.16 |
|                      | 100% Chronic pain                           | 1              | 98140       | 0.61                | 0.46 | 0.79 |
|                      | Chronic pain<100%                           | 4              | 98689       | 1.10                | 0.96 | 1.26 |

OR: odds ratio, 95%CI: 95% confidence interval, HR: hazards ratio, RR: relative risk, PTSD: Post-traumatic stress disorder, COPD: Chronic obstructive pulmonary disease, NSAIDs: Non-steroidal anti-inflammatory drugs, HIV: human immunodeficiency virus, AIDS: Acquired immunodeficiency syndrome

\* Factors were reported by two studies with HR/OR among 100% patients with chronic pain: opioid schedule, number of naloxone prescriptions, or medical insurance.

# Factors were reported by two or three studies with OR among patients mixed with acute pain (<20%): route of administration, myocardial infarction, cerebrovascular diseases, pancreatitis, heart failure, cardiovascular disease, diabetes, hypertension, hemiplegia or paraplegia, peripheral vascular disease, skin ulcers, peptic ulcer disease, skin infections/abscesses, burns, herpes simplex infection, dementia, sexually transmitted disease, warfarin, stimulants, serious autoimmune rheumatology disease, or days of hospitalization during the preceding 6 months.

**eFigure 1 Meta-analysis of the prevalence of opioid overdose**

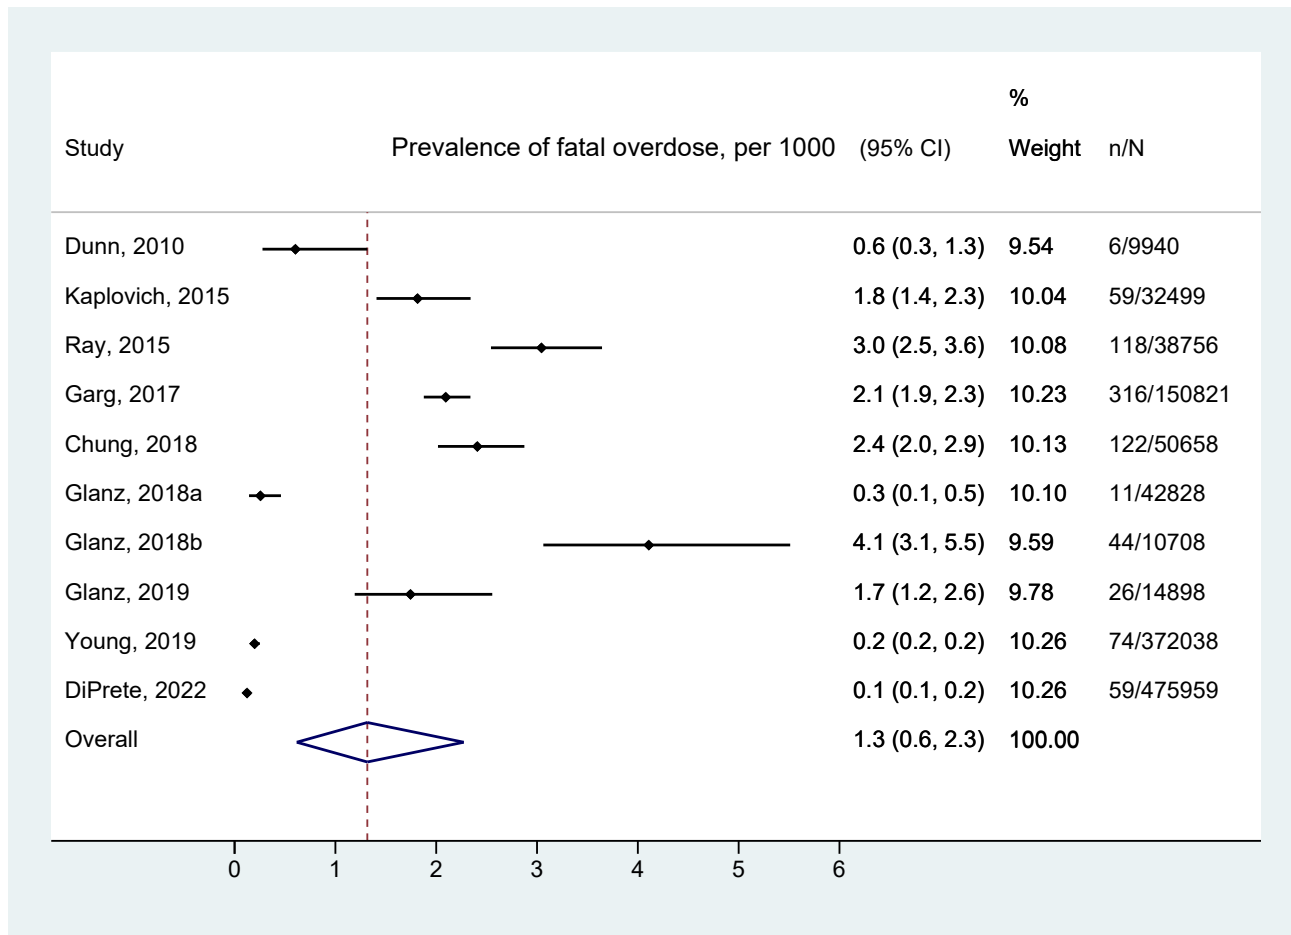

eFigure 1A Pooled prevalence of fatal overdose

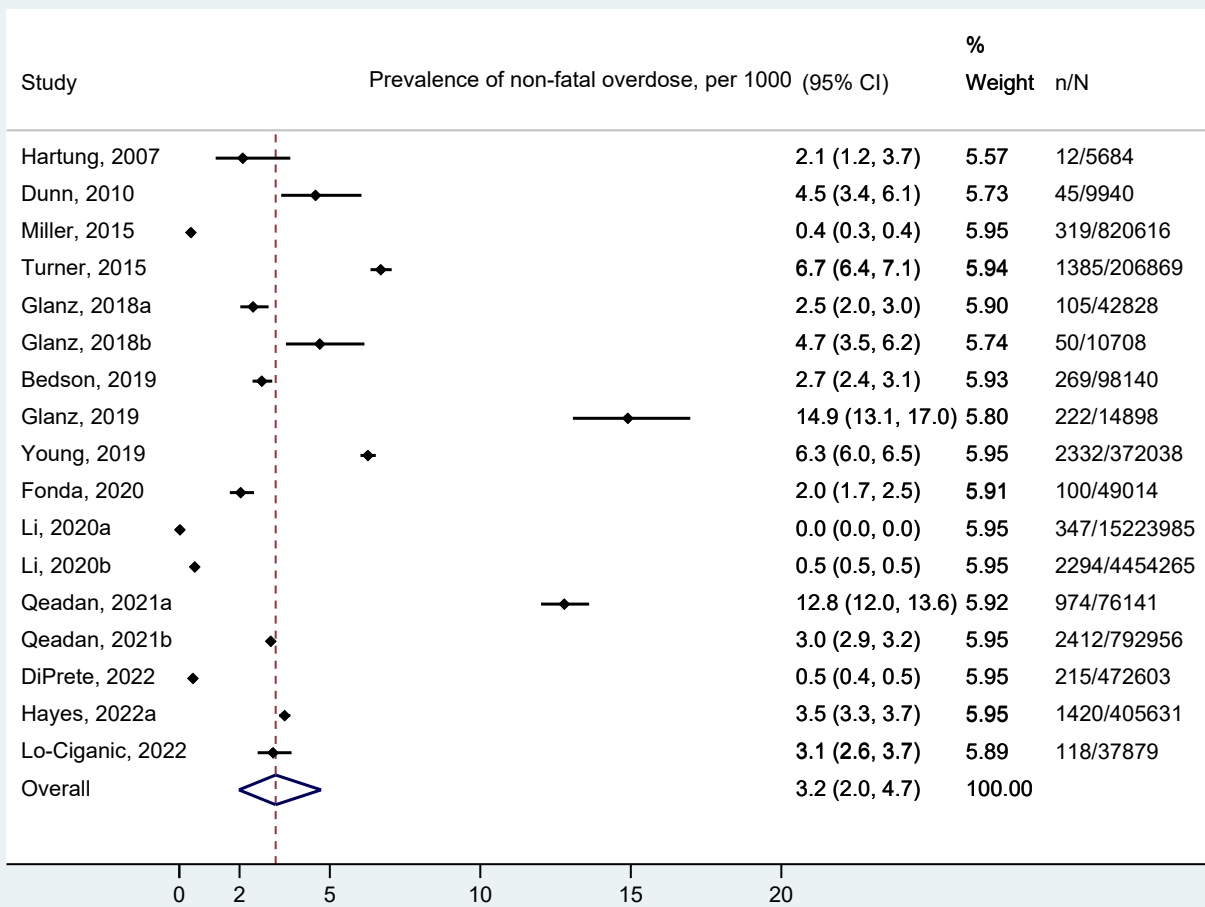

eFigure 1B Pooled prevalence of non-fatal overdose

**eFigure 2 Meta-analysis of the association of opioid prescribing factors**

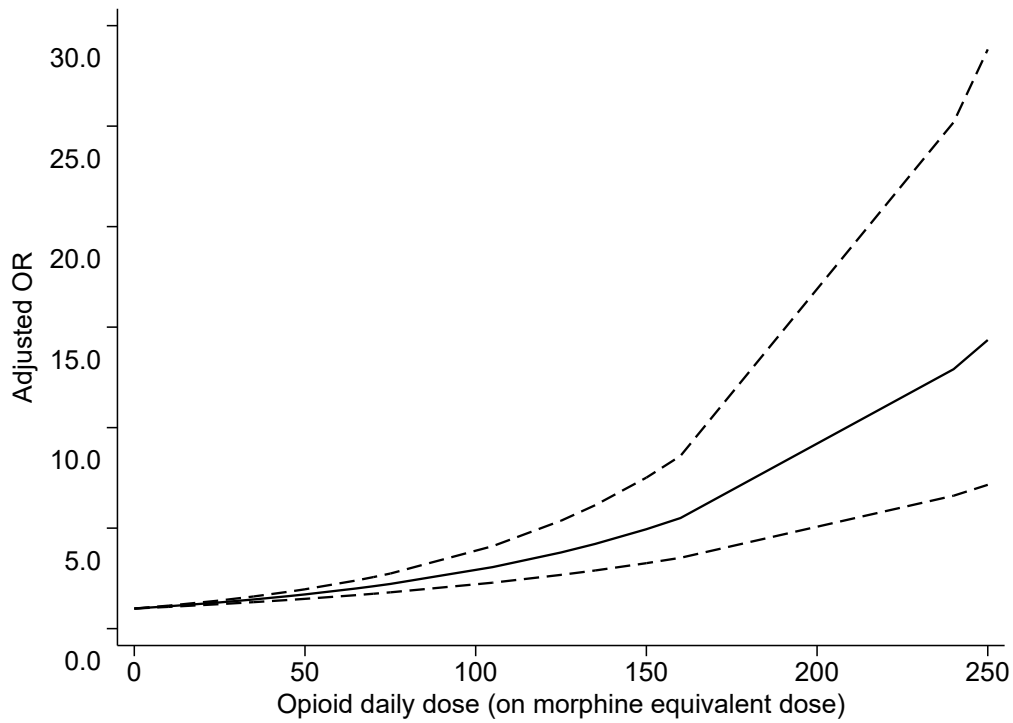

eFigure 2A Dose-response relationship between opioid dose and fatal/nonfatal overdose  
OR: odds ratio

P=0.006 for linear dose-response trend

P=0.45 for restricted cubic splines trend analysis (non-linear relationship)

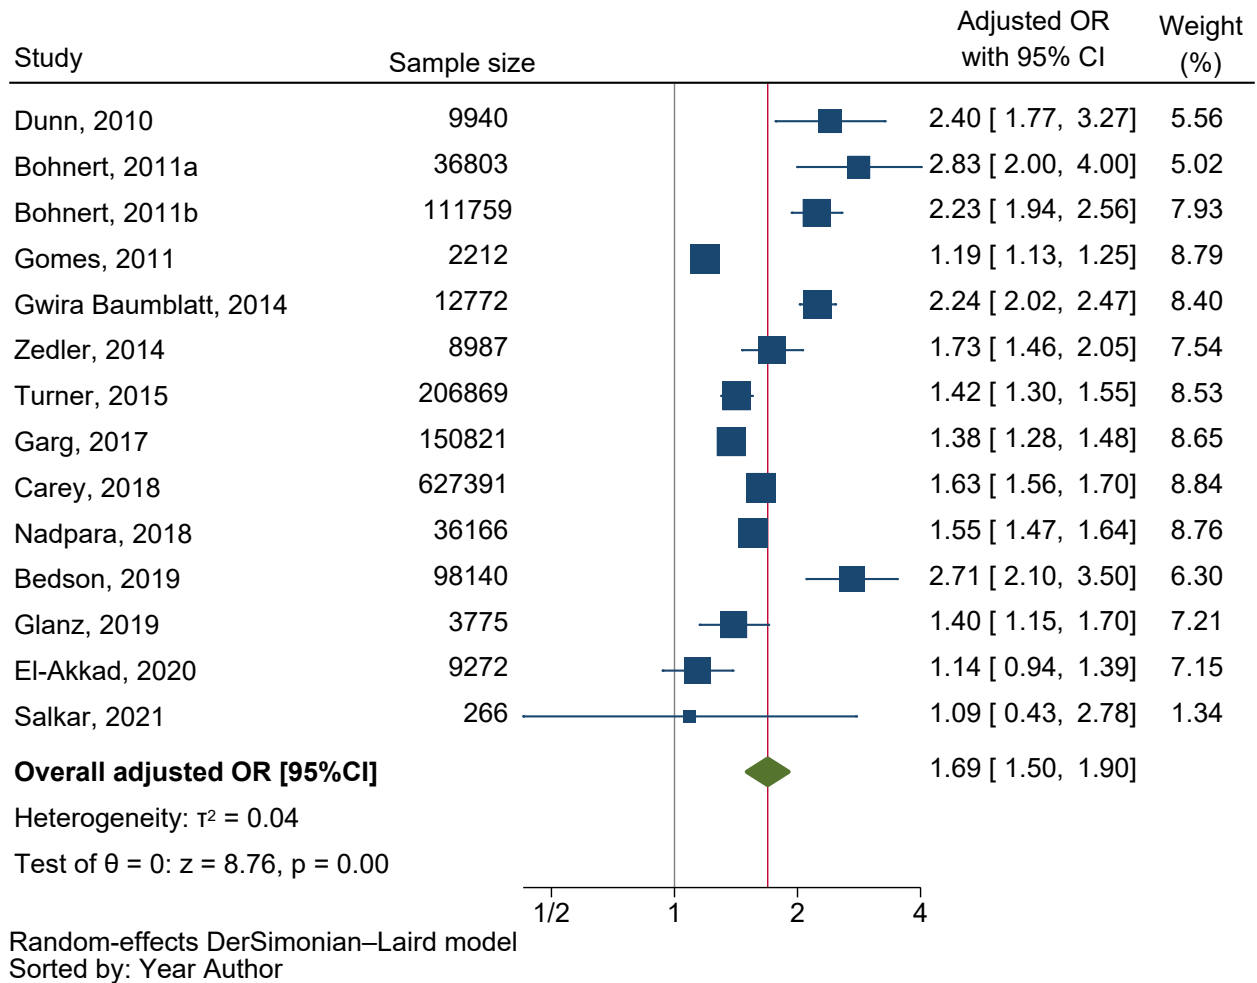

eFigure 2B Predictor of opioid dose (every 50mg increment on a morphine equivalent dose)

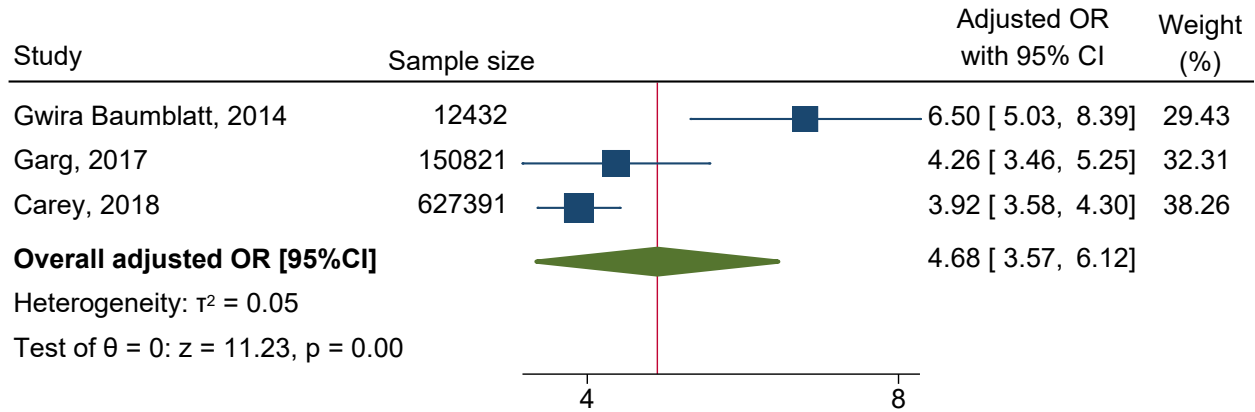

Random-effects DerSimonian–Laird model  
 Sorted by: Year Author

eFigure 2C Predictor of multiple opioid prescribers:  $\geq 3$  vs. less

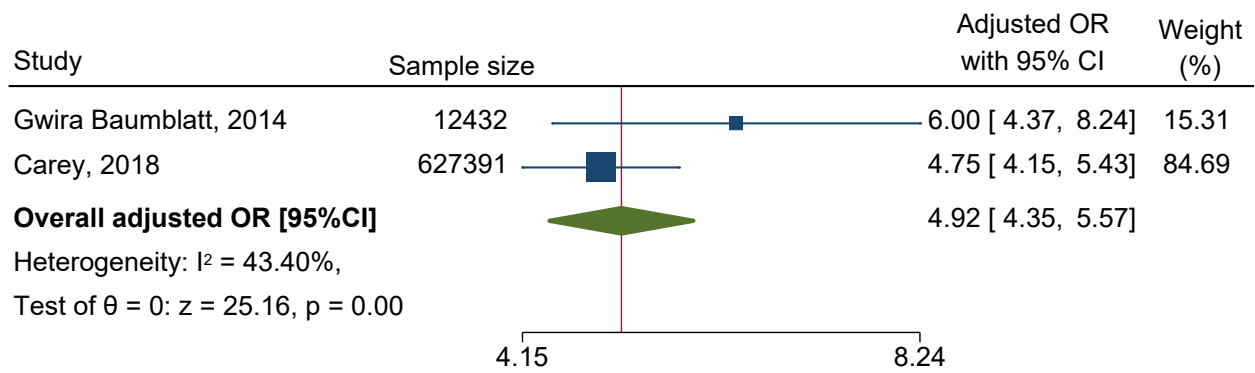

Fixed-effects inverse-variance model  
 Sorted by: Year Author

eFigure 2D Predictor of opioid dispensing at multiple pharmacies:  $\geq 4$  vs. less  
 \*Fixed-effects model was used for pooling two studies



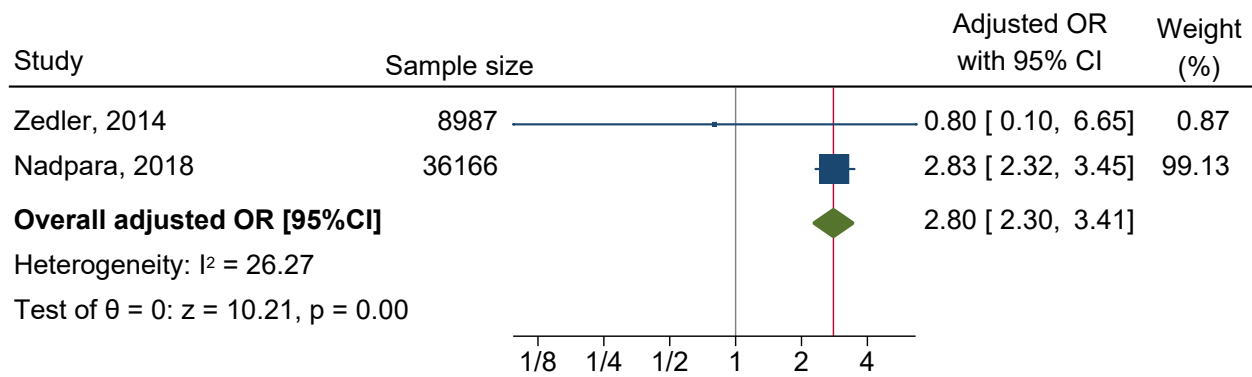

Fixed-effects inverse-variance model  
Sorted by: Year Author

eFigure 2E Predictor of fentanyl (including both transmucosal and transdermal fentanyl)

\*Fixed-effects model was used for pooling two studies

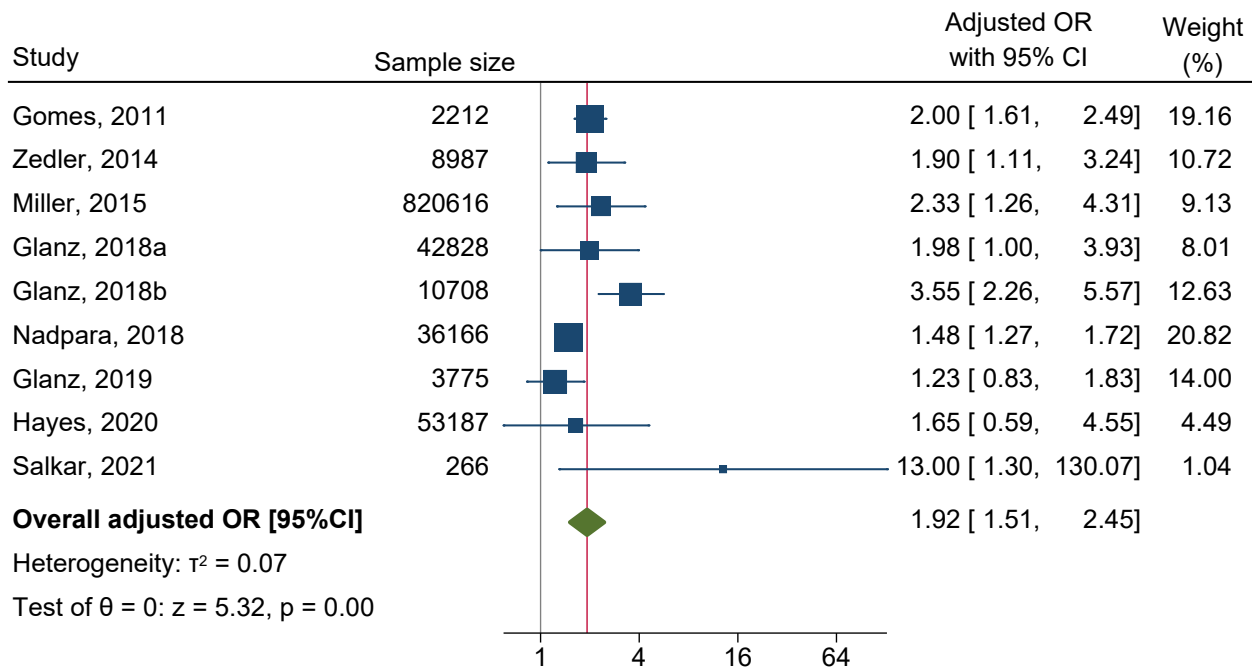

Random-effects DerSimonian–Laird model  
Sorted by: Year Author

eFigure 2F Predictor of long- vs. short-acting opioids

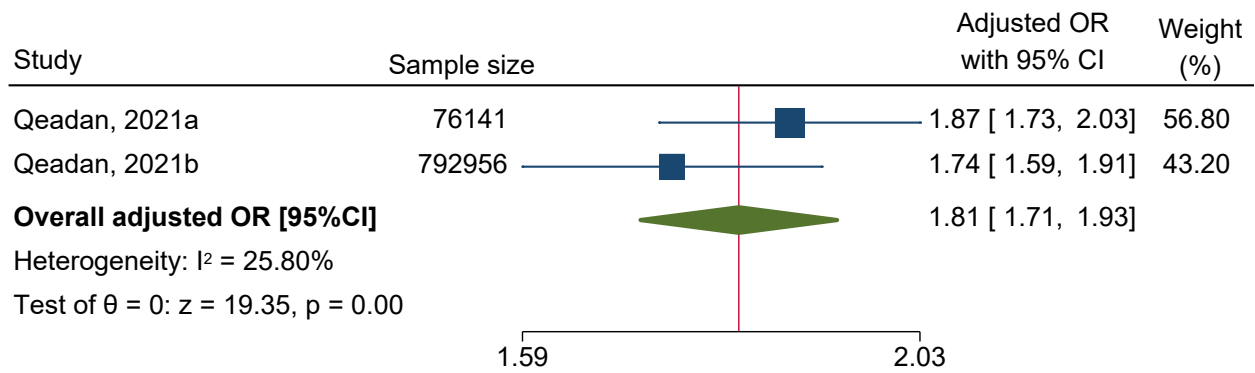

Fixed-effects inverse-variance model  
 Sorted by: Year Author

eFigure 2G Predictor of number of naloxone prescriptions  
 \*Fixed-effects model was used for pooling two studies

**eFigure 3 Meta-analysis of the association of co-medication factors**

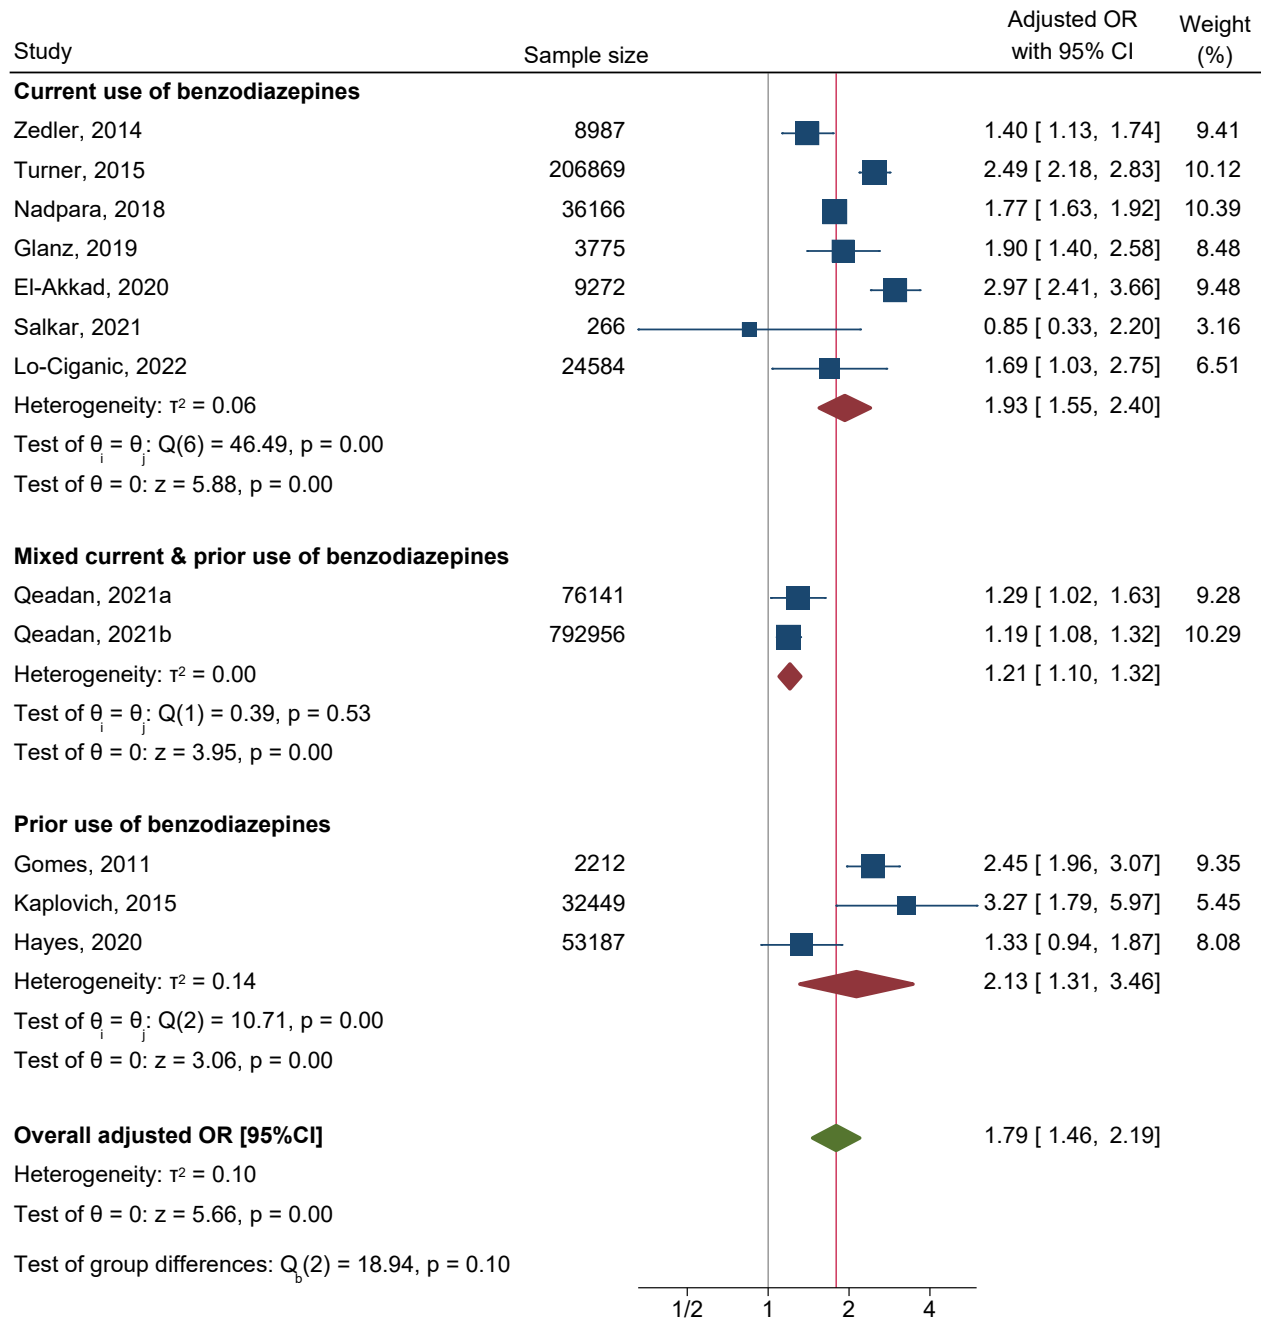

Random-effects DerSimonian–Laird model  
Sorted by: Year Author

**eFigure 3A Predictor of use of benzodiazepines: current vs history**  
\*test of interaction=0.10

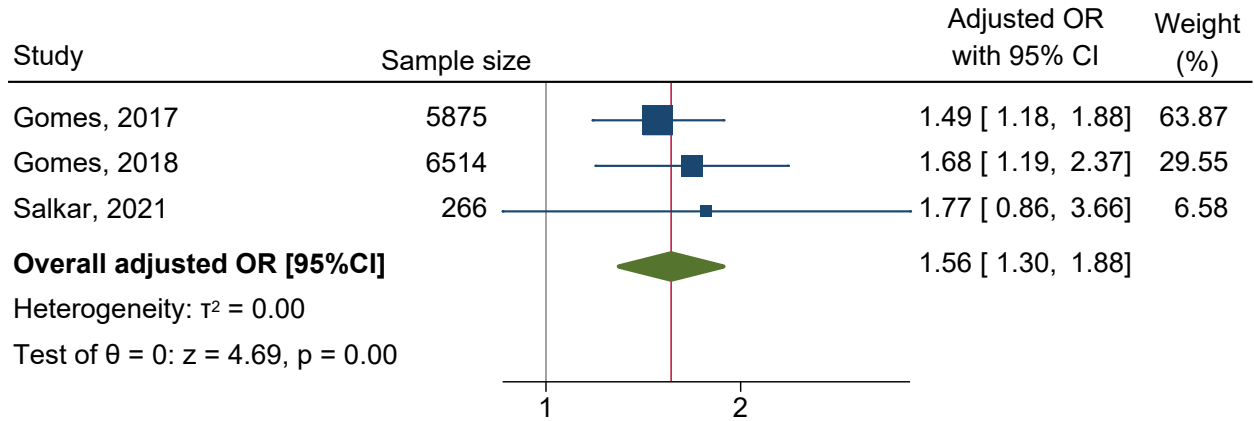

Random-effects DerSimonian–Laird model  
 Sorted by: Year Author

eFigure 3B Predictor of anticonvulsants

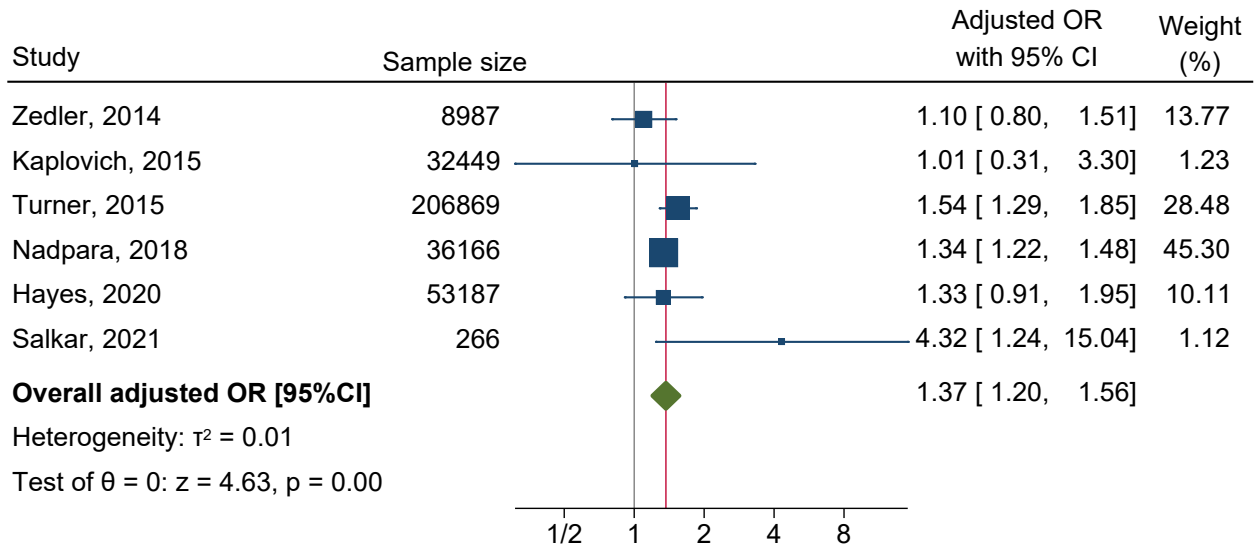

Random-effects DerSimonian–Laird model  
 Sorted by: Year Author

eFigure 3C Predictor of sedatives and hypnotics

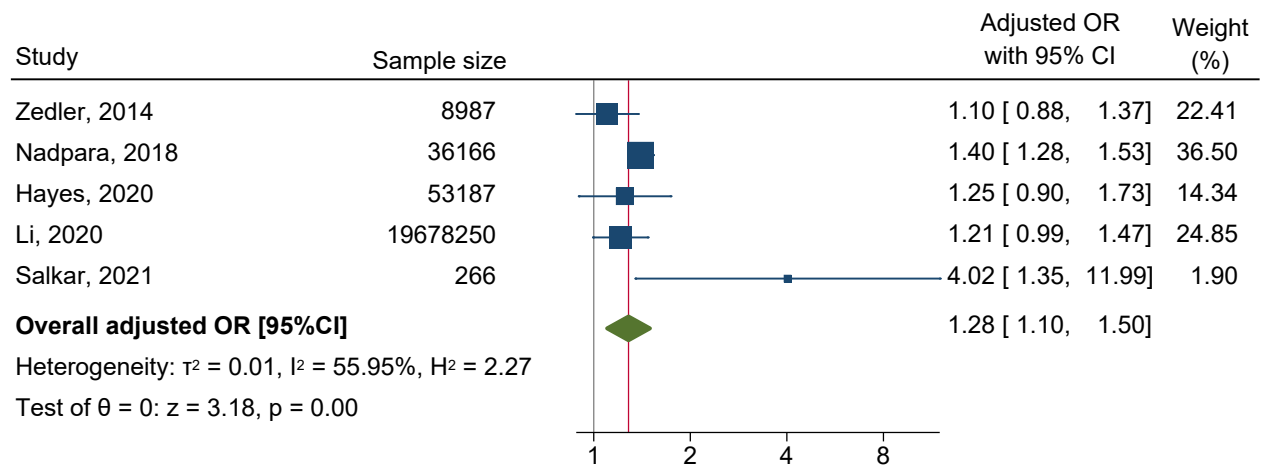

Random-effects DerSimonian–Laird model  
Sorted by: Year Author

eFigure 3D Predictor of muscle relaxants

**eFigure 4 Meta-analysis of the association of psychological factors**

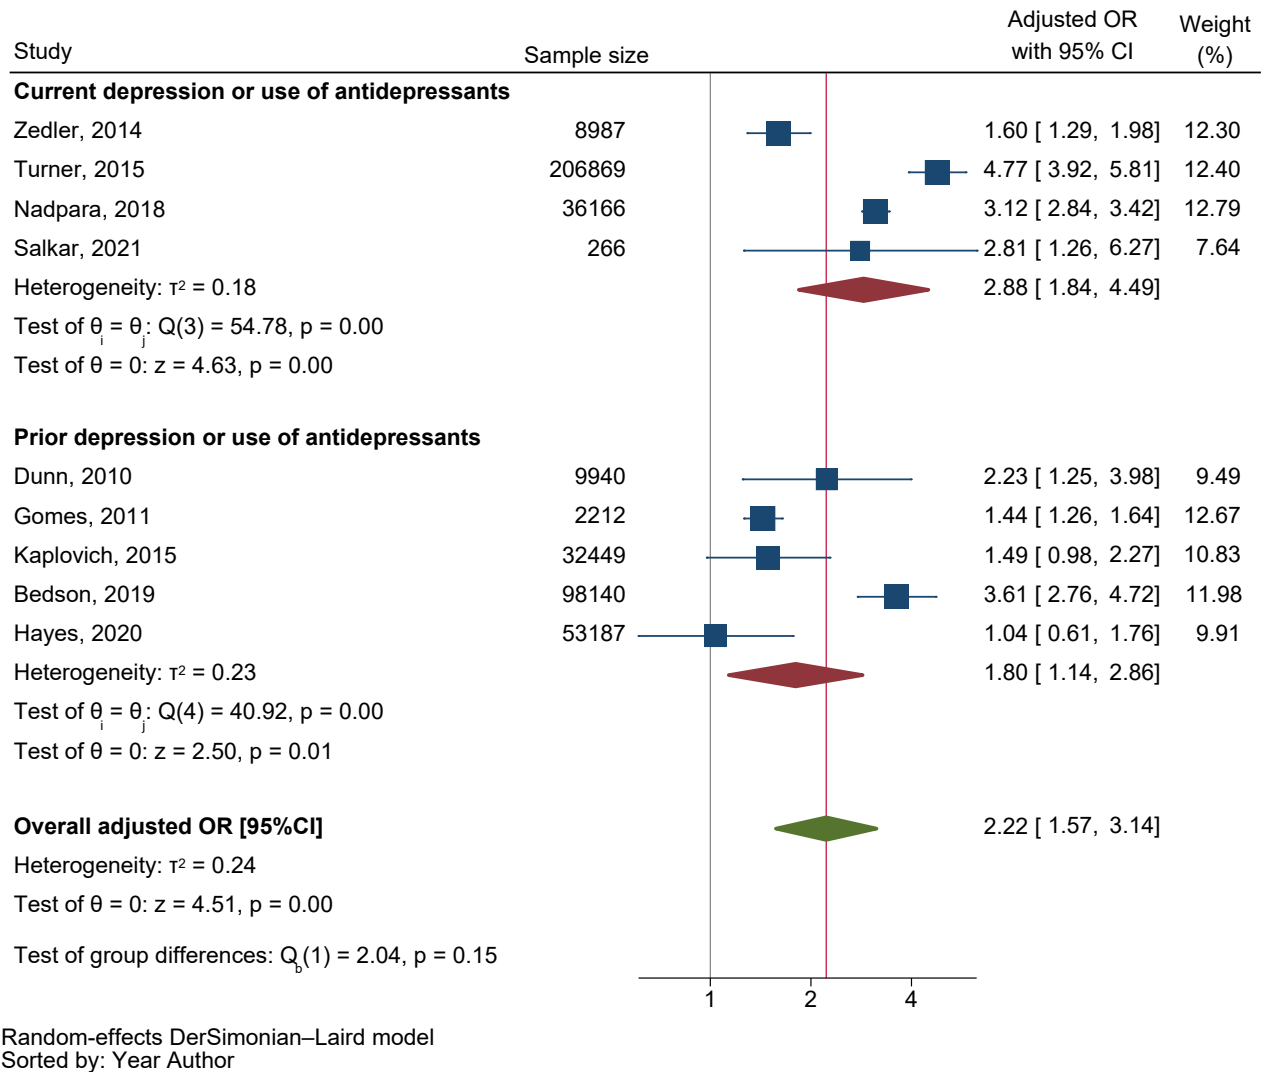

eFigure 4A Predictor of depression or use of antidepressants: current vs history  
\*test of interaction=0.15

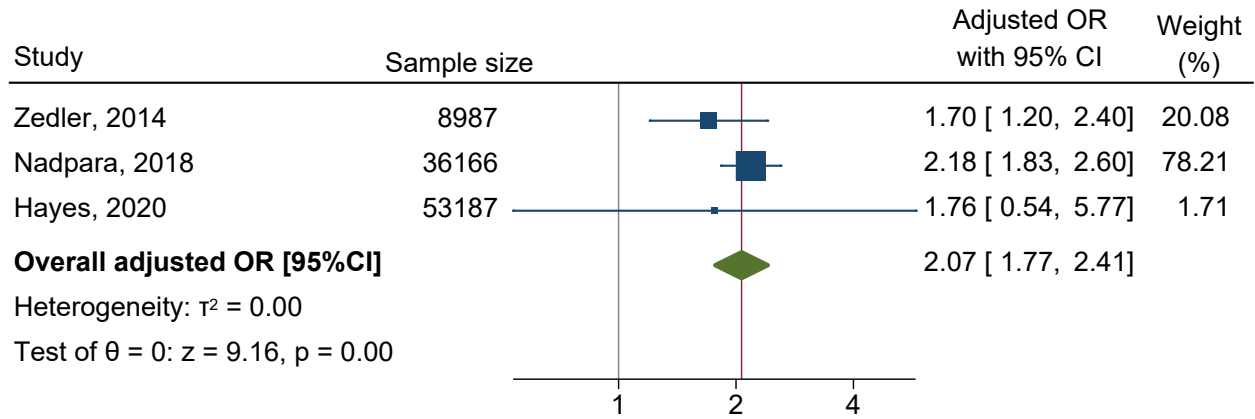

Random-effects DerSimonian–Laird model  
Sorted by: Year Author

eFigure 4B Predictor of bipolar disorder

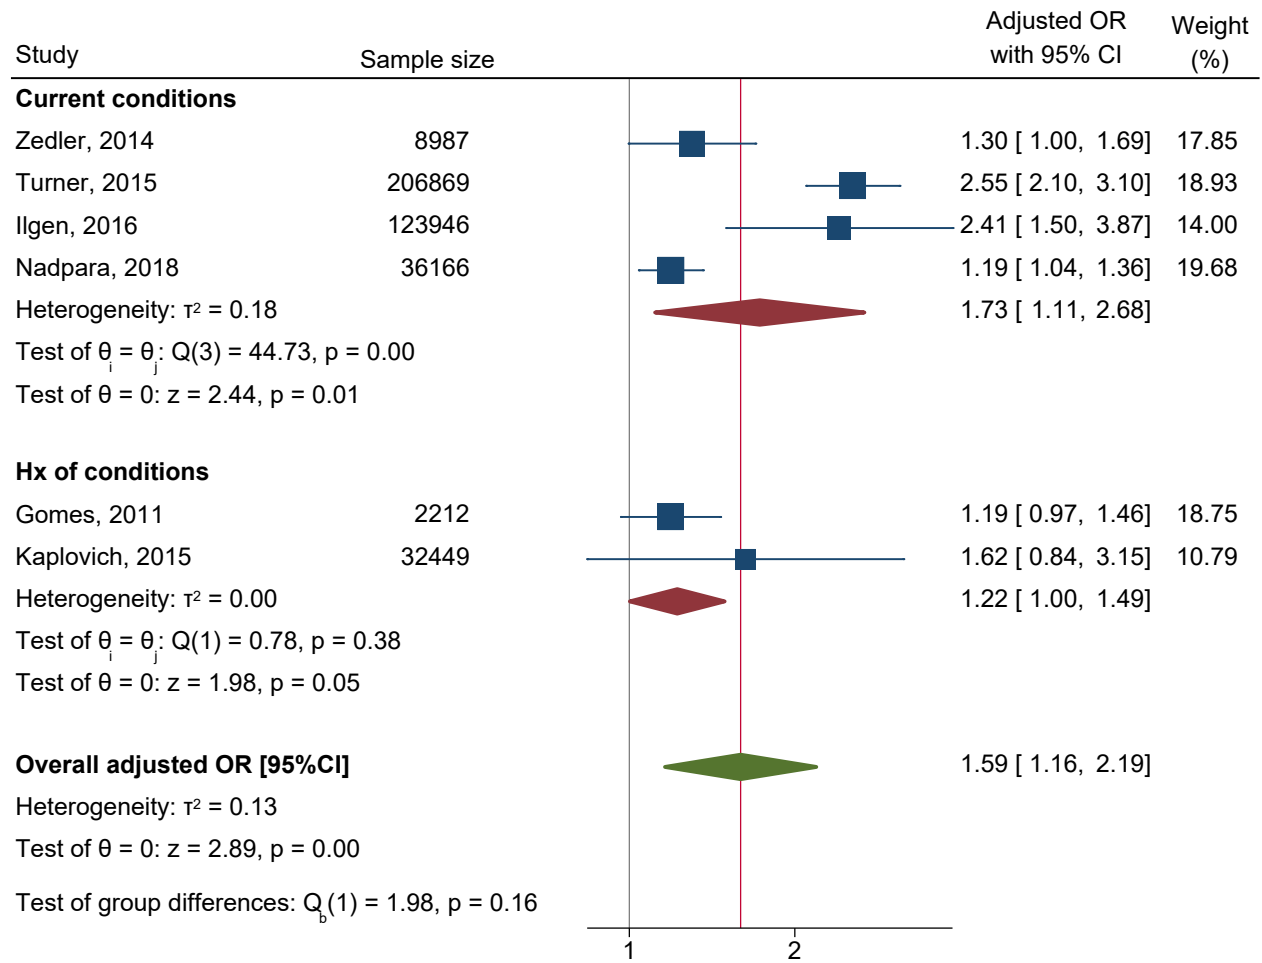

Random-effects DerSimonian–Laird model  
Sorted by: Year Author

eFigure 4C Predictor of psychotic disorders or use of antipsychotics: current vs history  
\*test of interaction=0.16



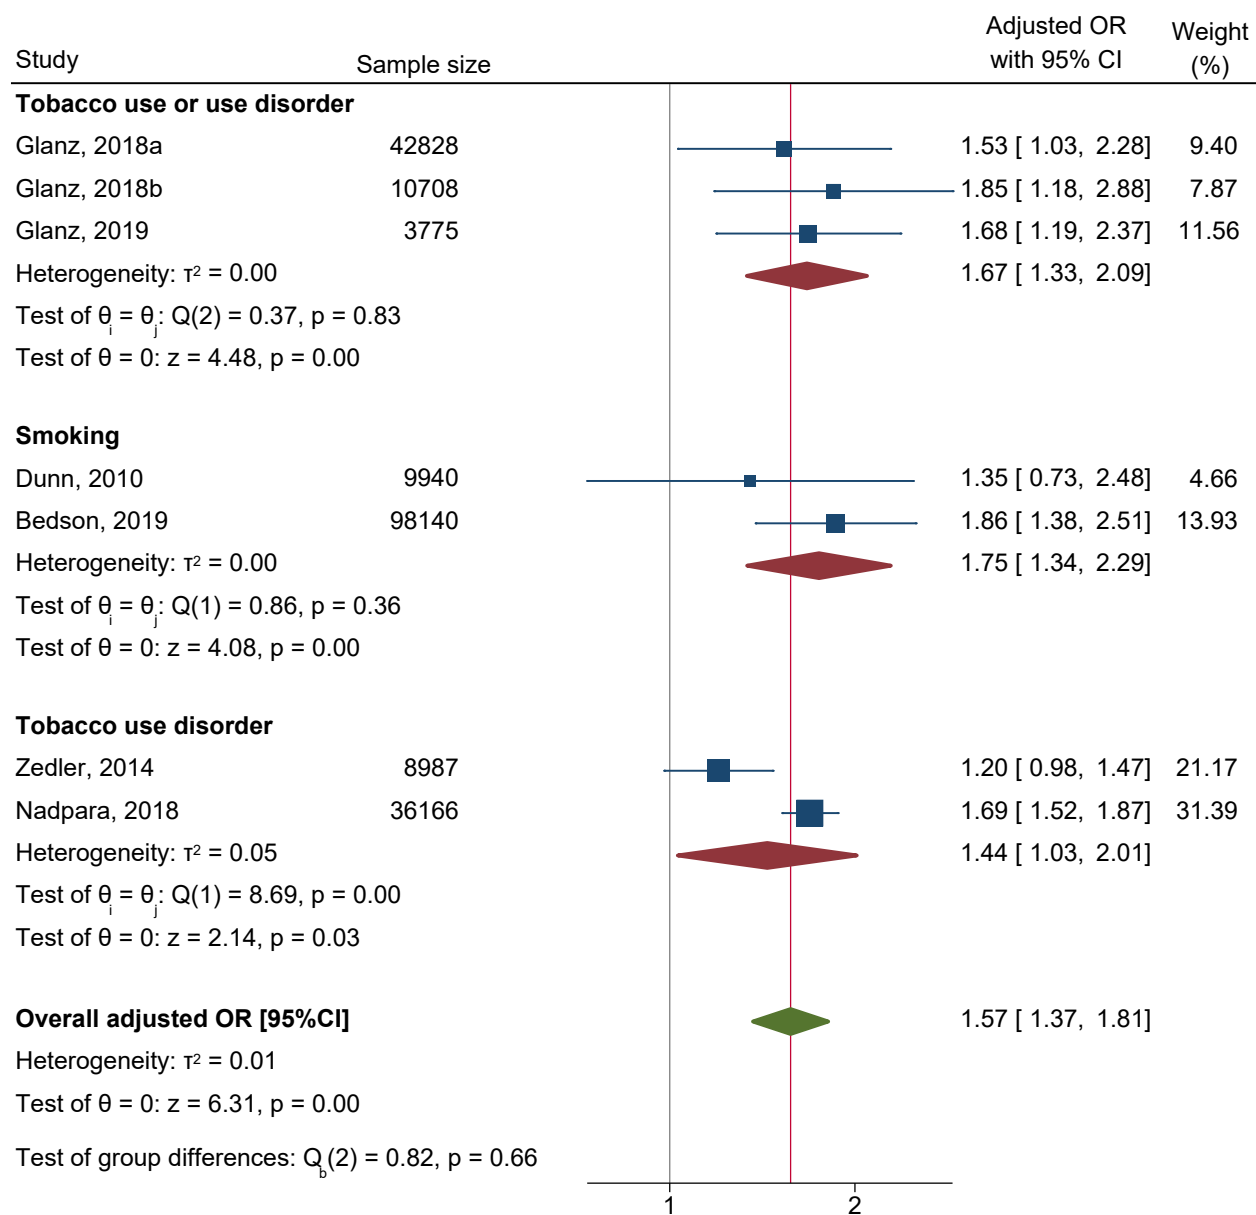

Random-effects DerSimonian–Laird model  
Sorted by: Year Author

eFigure 4D Predictor of tobacco use or use disorder: tobacco use vs. tobacco use disorder  
\* test of interaction  $p=0.66$

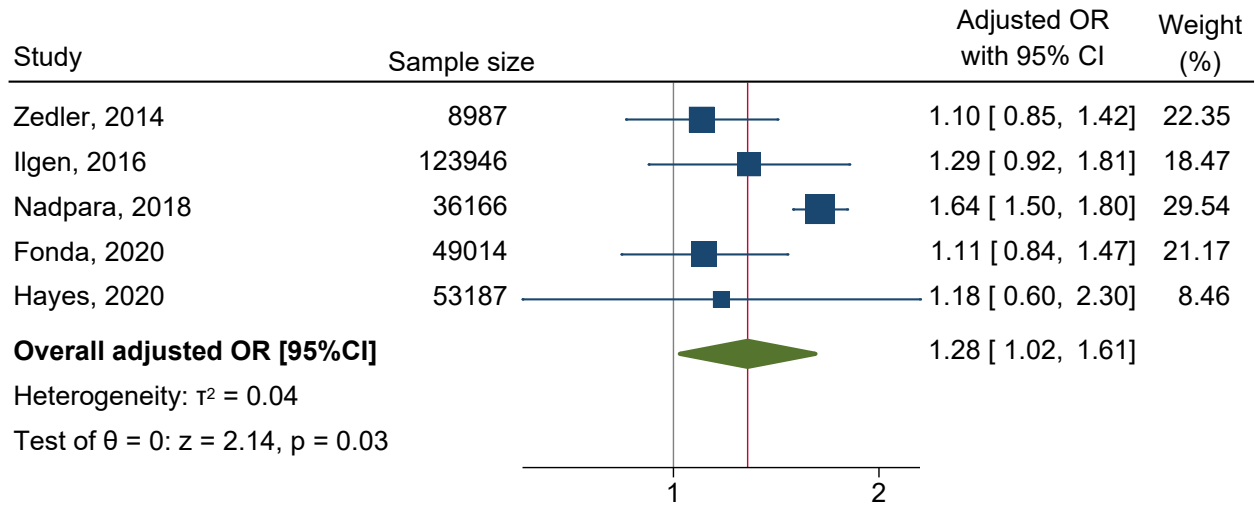

Random-effects DerSimonian–Laird model  
 Sorted by: Year Author

eFigure 4E Predictor of anxiety

**eFigure 5 Meta-analysis of the association of medical factors**

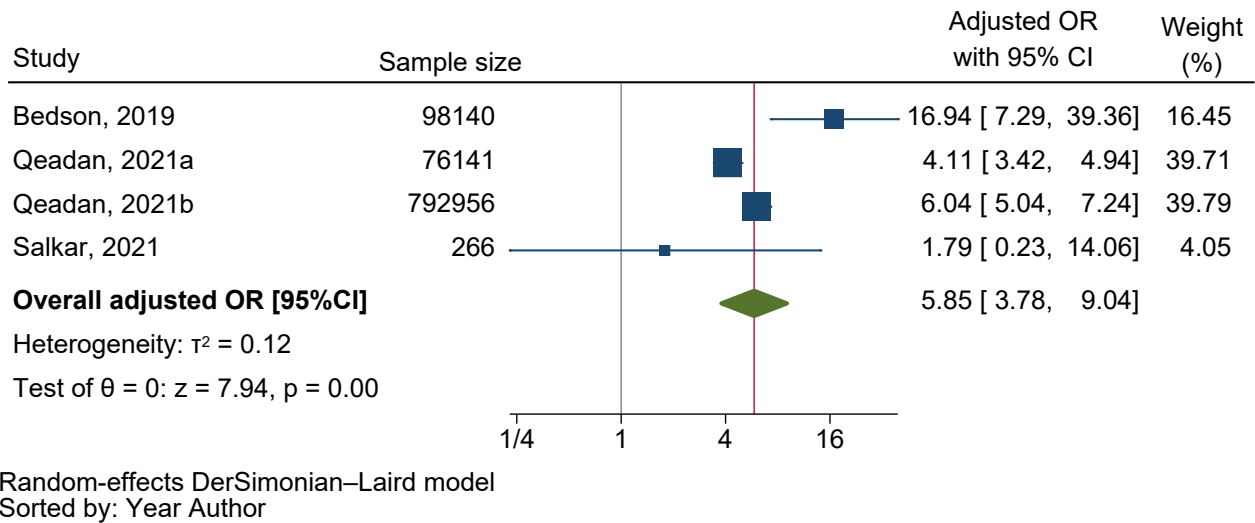

**eFigure 5A Predictor of previous overdose**

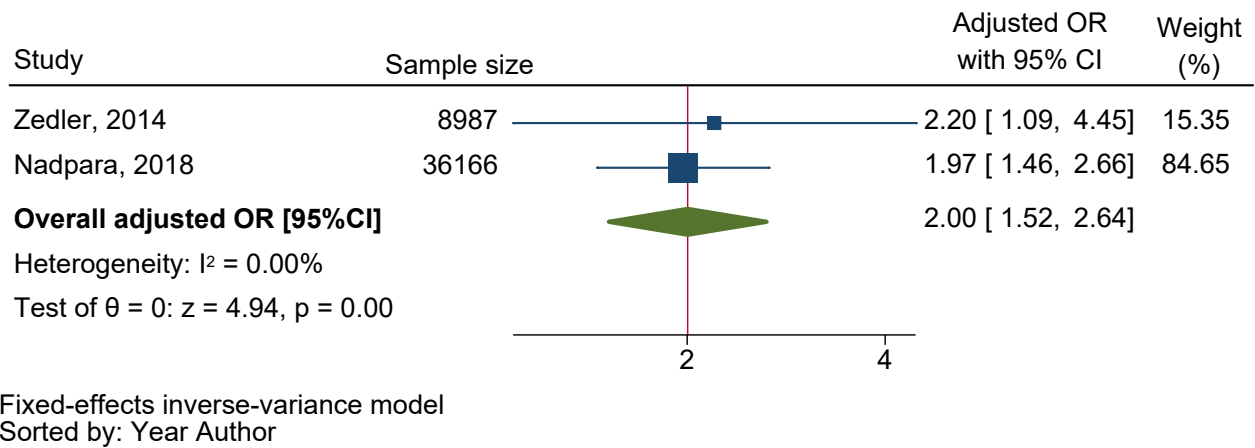

**eFigure 5B Predictor of pancreatitis**

\*Fixed-effects model was used for pooling two studies

**eFigure 6 Meta-analysis of the association of socio-demographic factors**

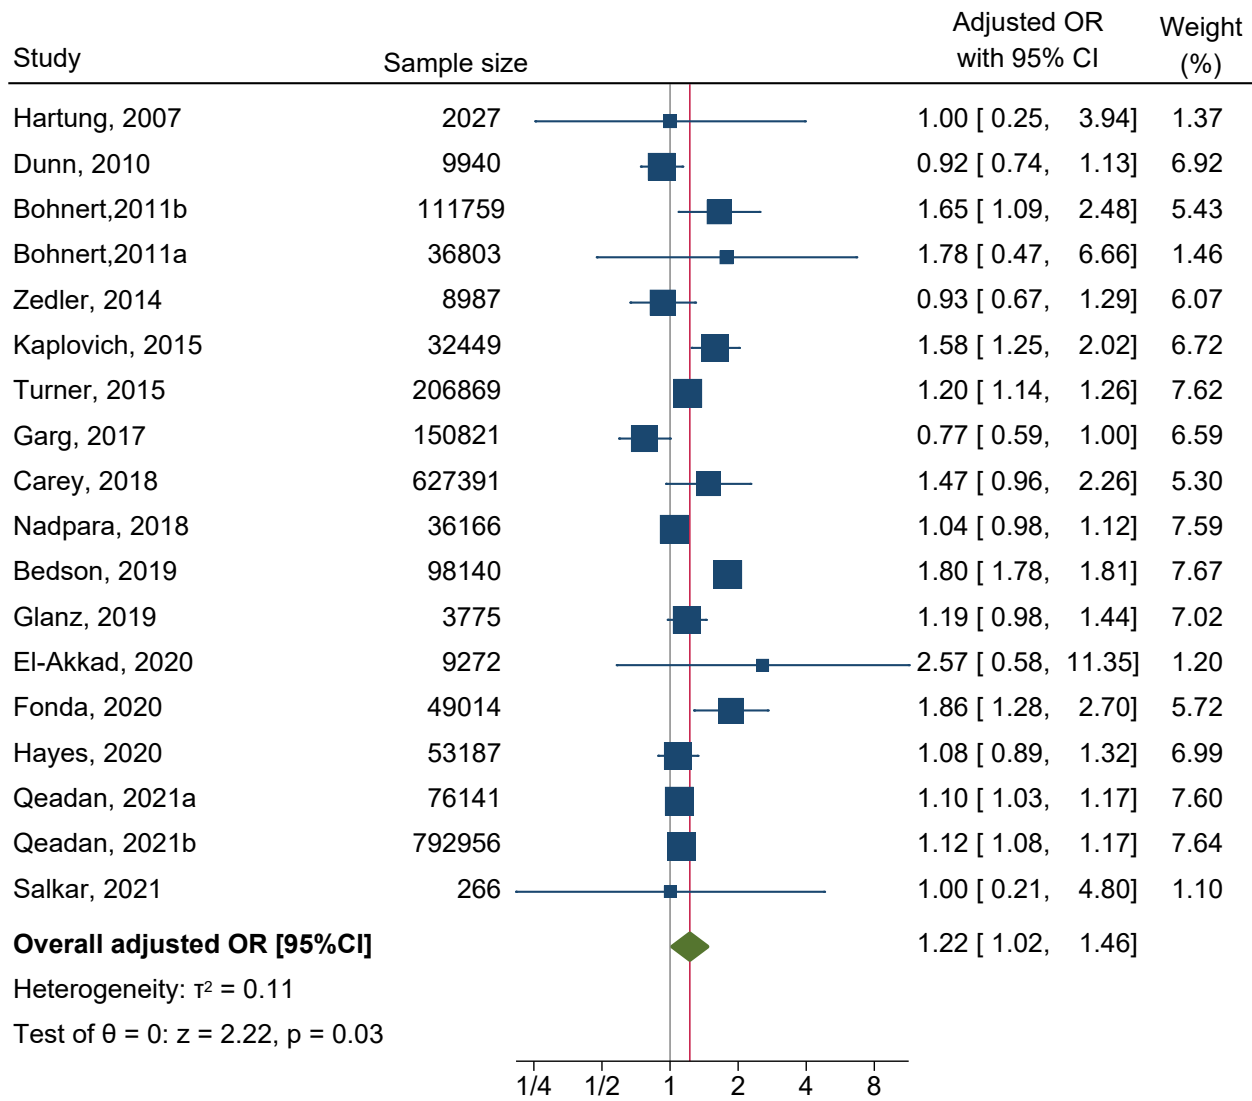

Random-effects DerSimonian–Laird model  
 Sorted by: Year Author

eFigure 6A Predictor of age (every 10-year decrement)

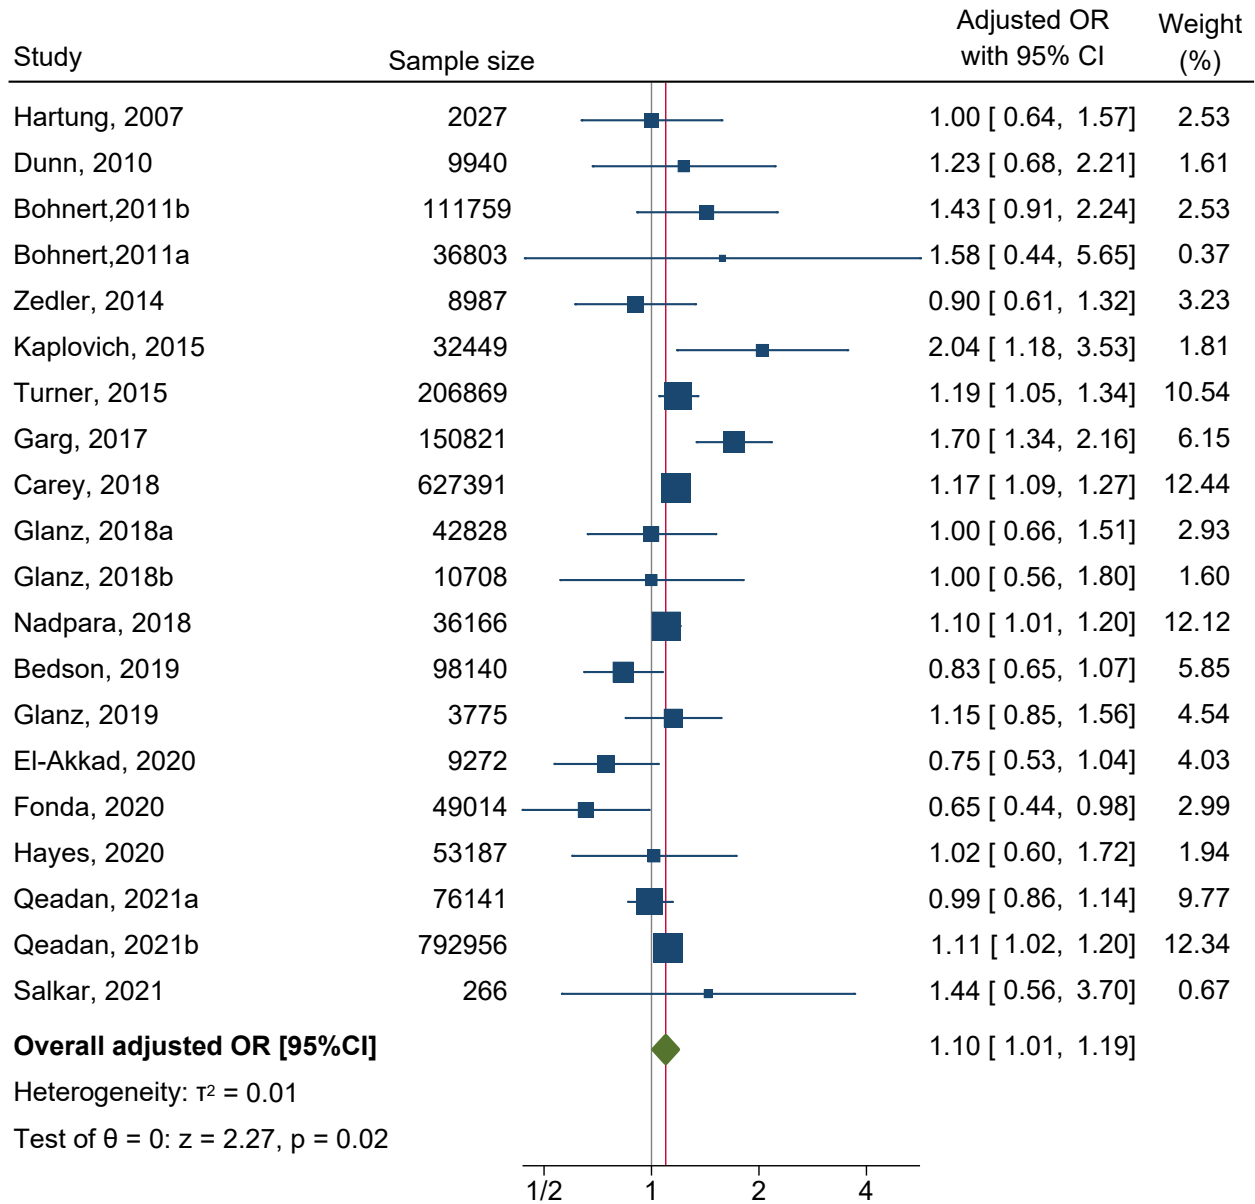

Random-effects DerSimonian–Laird model  
 Sorted by: Year Author

eFigure 6B Predictor of sex (Male vs. Female)

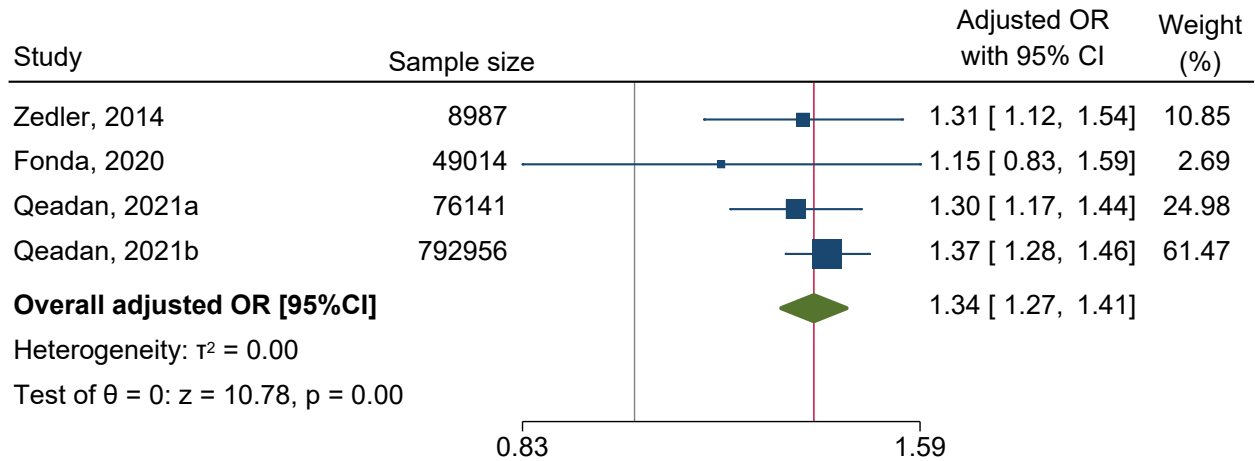

Random-effects DerSimonian–Laird model  
Sorted by: Year Author

eFigure 6C Predictor of marital status: non-married vs. married

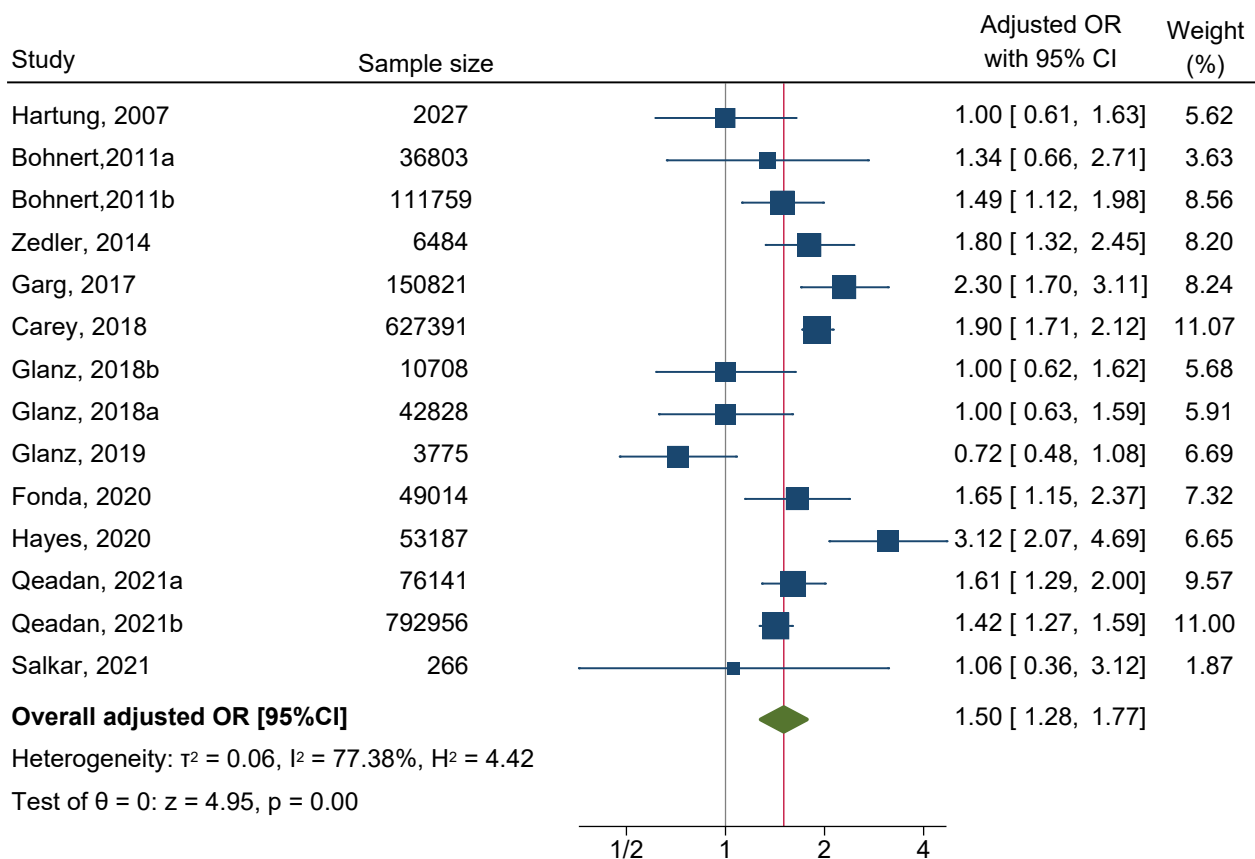

Random-effects DerSimonian–Laird model  
Sorted by: Year Author

eFigure 6D Predictor of White race vs others

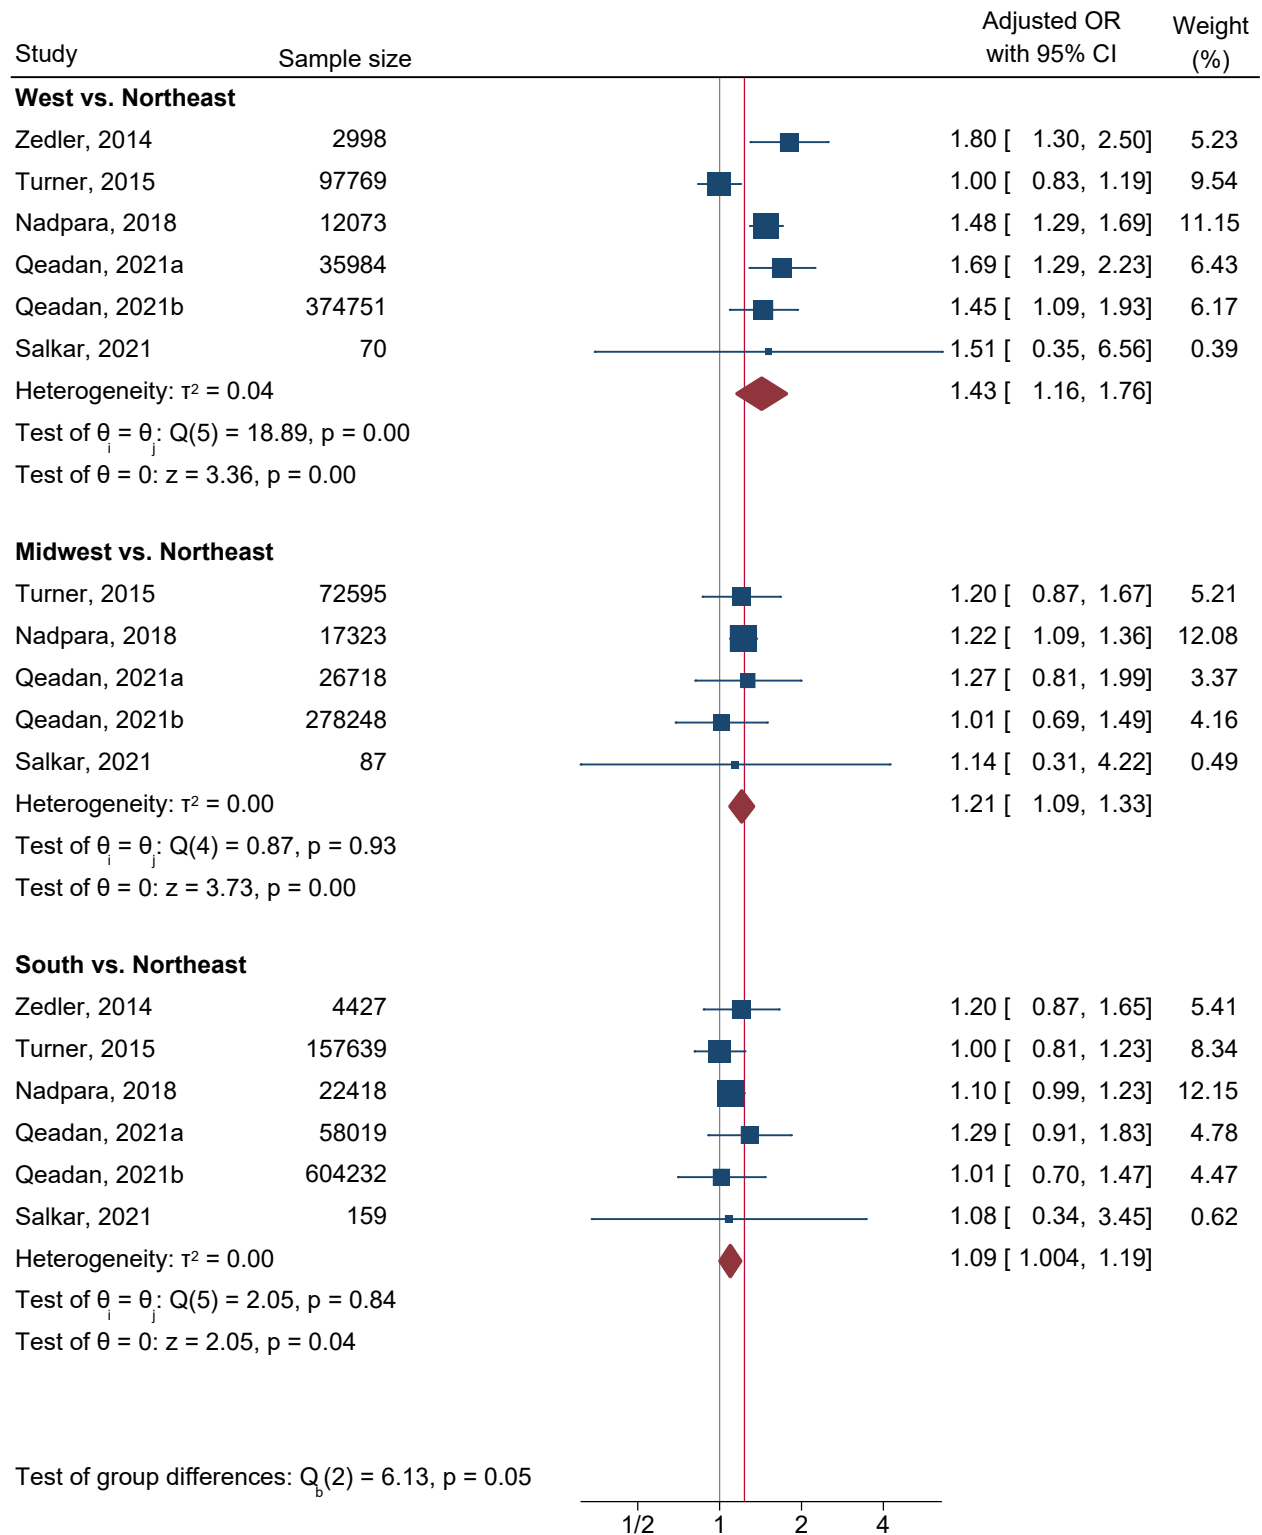

Random-effects DerSimonian–Laird model  
Sorted by: Year Author

eFigure 6E Predictor of geographic region in United States

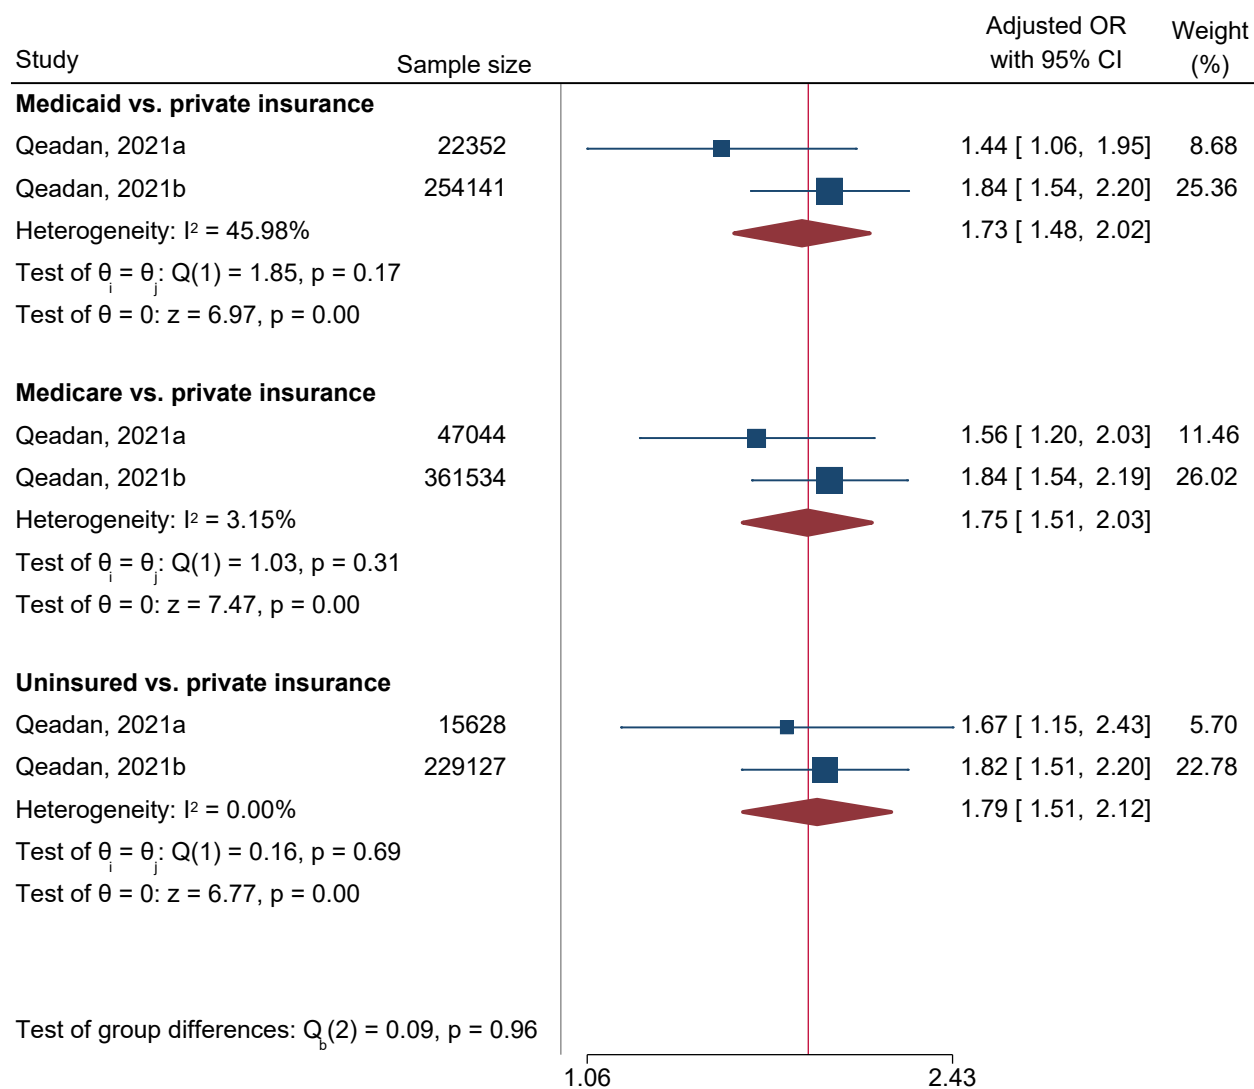

Fixed-effects inverse-variance model  
Sorted by: Year Author

eFigure 6F Predictor of insurance

\*Fixed-effects model was used for pooling two studies



**eFigure 7 Funnel plots with pseudo 95% confidence limits for opioid dose, current substance use disorder, age and sex**

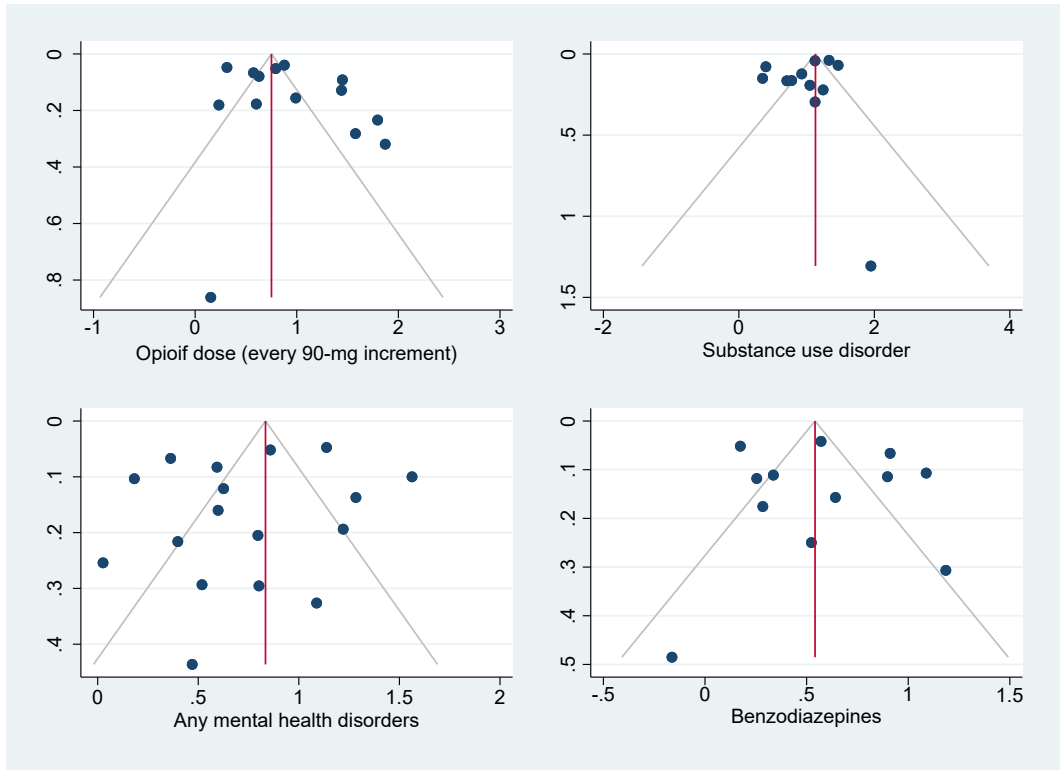

**eFigure 7A Funnel plots for opioid dose, current substance use disorder, any mental health disorders and use of benzodiazepines**

\* X-axis: adjusted odds ratio (on log scale); Y-axis: standard error of adjusted odds ratio.

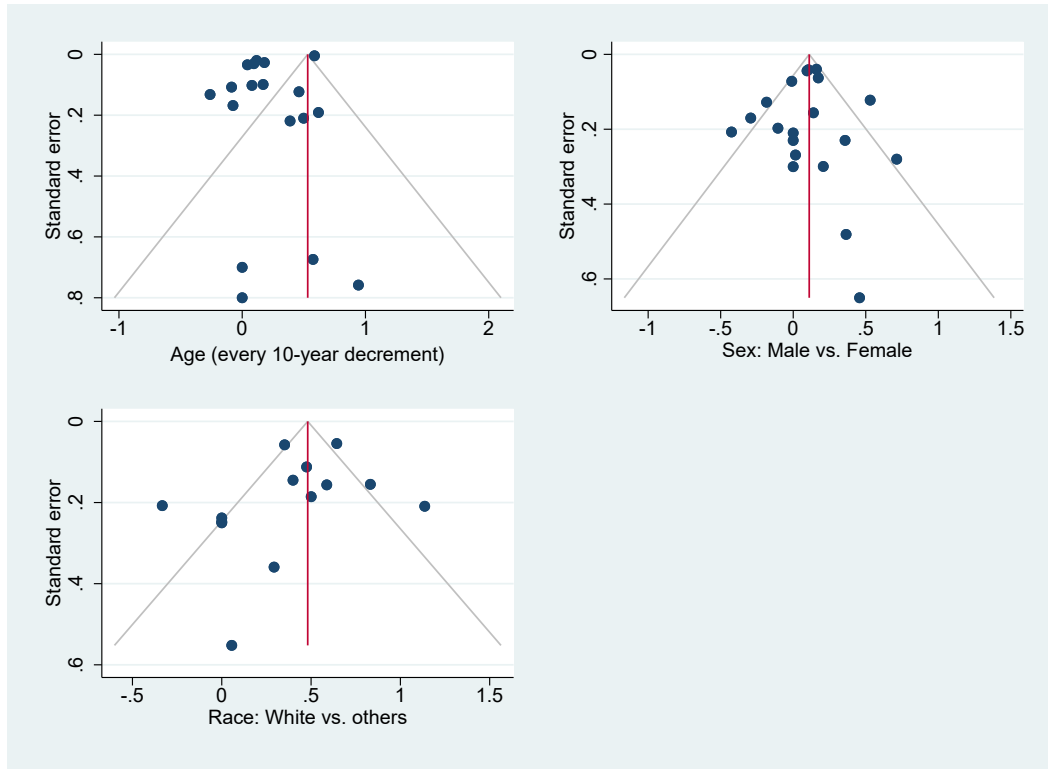

eFigure 7B Funnel plots for age, sex and race

\* X-axis: adjusted odds ratio (on log scale); Y-axis: standard error of adjusted odds ratio.

## Section 1 Search strategies

### MEDLINE

1 exp Analgesics, Opioid/ (131570)

2 (opioid\* or opiate\*).mp. [mp=title, book title, abstract, original title, name of substance word, subject heading word, floating sub-heading word, keyword heading word, organism supplementary concept word, protocol supplementary concept word, rare disease supplementary concept word, unique identifier, synonyms] (154252)

3 (alfentanil or alphaprodine or beta-casomorphin\$ or buprenorphine or carfentanil or codeine or deltorphin or dextromethorphan or dezocine or dihydrocodeine or dihydromorphine or enkephalin\$ or ethylketocyclazocine or ethylmorphine or etorphine or fentanyl or heroin or hydrocodone or hydromorphone or ketobemidone or levorphanol or lofentanil or meperidine or meptazinol or methadone or methadyl acetate or morphine or nalbuphine or opium or oxycodone or oxymorphone or pentazocine or phenazocine or phenoperidine or piritramide or promedol or propoxyphene or remifentanil or sufentanil or tilidine or tapentadol).mp. [mp=title, book title, abstract, original title, name of substance word, subject heading word, floating sub-heading word, keyword heading word, organism supplementary concept word, protocol supplementary concept word, rare disease supplementary concept word, unique identifier, synonyms] (167325)

4 exp Narcotics/ (139764)

5 (narcotic\* or adolonta or Anpec or Ardinex or Asimadoline or Alvimopam or amadol or biodalgic or biokanol or Codinovo or contramal or Demerol or Dicodid or Dihydrocodeinone or dihydromorphinone or dihydrohydroxycodone or dihydrone or dilaudid or dinarkon or dolsin or dolosal or dolin or dolantin or dolargan or dolcontral or duramorph or duromorph or duragesic or durogesic or eucodal or Fedotzine or Fentanest or Fentora or Fortral or Hycodan or Hycon or Hydrocodone or Hydrocodeinonebitartrate or hydromorphon or hydroxycodone or isocodeine or isonipecain or jutadol or laudacon or l dromoran or levodroman or levorphanol or levo-dromoran or levodromoran or lexicr or lidol or lydol or morfín or morfíne or morphia or morphin or morphinium or morphinene or morphium or ms contin or n-methylmorphine or n methylmorphine or nobligan or numorphan or oramorph or oxycodone or oxiconum or oxycone or oxycontin or palladone or pancodine or pethidine or phentanyl or prontofort or robidone or skenan or sublimaze or sulfentanyl or sulfentanil or sufenta or takadol or talwin or theocodin or tramadol or tramadolhameln or tramadolol or tramadura or tramagetic or tramagit or tramake or tramal or tramex or tramundin or trasedal or theradol or tiral or topalgic or tradol or tradolpuren or tradonal or tralgiol or tramadorsch or tramadin or tramadoc or ultram or zamudol or zumalgic or zydol or zytram).mp. [mp=title, book title, abstract, original title, name of substance word, subject heading word, floating sub-heading word, keyword heading word, organism supplementary concept word, protocol supplementary concept word, rare disease supplementary concept word, unique identifier, synonyms] (75782)

6 or/1-5 (279610)

7 ((chronic\* or recur\* or persist\* or non-malign\* or malign\* or noncancer\* or non-cancer\* or cancer\*) adj3 pain).mp. [mp=title, book title, abstract, original title, name of substance word, subject heading word, floating sub-heading word, keyword heading word, organism supplementary concept word, protocol supplementary concept word, rare disease supplementary concept word, unique identifier, synonyms] (111121)

8 Chronic Pain/ or Cancer Pain/ or exp Osteoarthritis/ or exp Arthritis, Rheumatoid/ or exp Neuralgia/ or Diabetic Neuropathies/ or Irritable Bowel Syndrome/ or Migraine Disorders/ or Fibromyalgia/ or complex regional pain syndromes/ or exp causalgia/ or exp reflex sympathetic dystrophy/ or Pain, Intractable/ or Phantom Limb/ or Hyperalgesia/ or exp back pain/ or Radiculopathy/ or musculoskeletal pain/ or headache/ or exp Arthralgia/ or exp Headache Disorders/ or Temporomandibular Joint Disorders/ or exp whiplash injury/ or exp Cumulative Trauma Disorders/ or exp Peripheral Nervous System Diseases/dt or Pain Measurement/de (444350)

9 (osteoarthritis\* or osteo-arthritis or degenerative arthritis\* or neuralgia\* or zoster or IBS or migraine\* or complex regional pain syndromes or causalgia or radiculopathy\* or headache\* or whiplash\* or TMD or backache\* or backpain\* or dorsalgia\* or arthralgia\* or polyarthralgia\* or arthrodynia\* or myalgia\* or fibromyalgia\* or myodynin\* or neuralgia\* or ischialgia\* or crps or rachialgia\*).mp. [mp=title, book title, abstract, original title, name of substance word, subject heading word, floating sub-heading word, keyword heading word, organism supplementary concept word, protocol supplementary concept word, rare disease supplementary concept word, unique identifier, synonyms] (360852)

10 ((back or discogen\* or bone or musculoskeletal\* or muscle\* or skelet\* or spinal or spine or vertebra\* or joint\* or arthritis or Intestin\* or neuropath\* or neck or cervical\* or head or facial\* or complex or radicular or cervicobrachial\* or orofacial or somatic or shoulder\* or knee\* or hip or hips or TMJ or TMJD) adj3 pain).mp. [mp=title, book title, abstract, original title, name of substance word, subject heading word, floating sub-heading word, keyword heading word, organism supplementary concept word, protocol supplementary concept word, rare disease supplementary concept word, unique identifier, synonyms] (198852)

11 (irritable adj3 (colon or bowel)).mp. [mp=title, book title, abstract, original title, name of substance word, subject heading word, floating sub-heading word, keyword heading word, organism supplementary concept word, protocol supplementary concept word, rare disease supplementary concept word, unique identifier, synonyms] (17371)  
12 or/7-11 (743895)  
13 6 and 12 (36876)  
14 Drug Overdose/ (13738)  
15 exp Drug Misuse/ (16666)  
16 (overdos\* or poison\*).mp. [mp=title, book title, abstract, original title, name of substance word, subject heading word, floating sub-heading word, keyword heading word, organism supplementary concept word, protocol supplementary concept word, rare disease supplementary concept word, unique identifier, synonyms] (187834)  
17 mortality/ or death/ (68260)  
18 (mortality or death).ti,ab. (1577261)  
19 or/14-18 (1768050)  
20 13 and 19 (2363)  
21 Epidemiologic Studies/ (9187)  
22 exp Case-Control Studies/ (1358034)  
23 exp Cohort Studies/ (2400853)  
24 Case control.tw. (146885)  
25 (cohort adj (study or studies)).tw. (286892)  
26 Cohort analy\$.tw. (10787)  
27 (Follow up adj (study or studies)).tw. (54492)  
28 (observational adj (study or studies)).tw. (146787)  
29 Longitudinal.tw. (301979)  
30 Retrospective.tw. (688718)  
31 Cross sectional.tw. (470226)  
32 Cross-sectional studies/ (441886)  
33 or/21-32 (3614350)  
34 exp animals/ not humans.sh. (5052213)  
35 33 not 34 (3541325)  
36 20 and 35 (647)

## EMBASE

1 chronic pain/ or cancer pain/ or exp osteoarthritis/ or exp rheumatoid arthritis/ or exp neuralgia/ or diabetic neuropathy/ or irritable colon/ or fibromyalgia/ or intractable pain/ or agnosia/ or phantom pain/ or amputation stump/ or hyperalgesia/ or exp backache/ or exp radiculopathy/ or musculoskeletal pain/ or exp arthralgia/ or headache/ or temporomandibular joint disorder/ or whiplash injury/ or exp cumulative trauma disorder/ (1052612)  
2 ((chronic\* or recur\* or persist\* or non-malign\* or malign\* or noncancer\* or non-cancer\* or cancer\*) adj3 pain).mp. (186805)  
3 (osteoarthrit\* or osteo-arthritis or degenerative arthrit\* or neuralg\* or zoster or IBS or migraine\* or complex regional pain syndromes or causalgia or radiculopath\* or headache\* or whiplash\* or TMD or backache\* or backpain\* or dorsalg\* or arthralgi\* or polyarthralgi\* or arthrodyni\* or myalgi\* or fibromyalgi\* or myodyn\* or neuralgi\* or ischialgi\* or crps or rachialgi\*).mp. (790387)  
4 ((back or discogen\* or bone or musculoskelet\* or muscle\* or skelet\* or spinal or spine or vertebra\* or joint\* or arthritis or Intestin\* or neuropath\* or neck or cervical\* or head or facial\* or complex or radicular or cervicobrachi\* or orofacial or somatic or shoulder\* or knee\* or hip or hips or TMJ or TMJD) adj3 pain).mp. (343192)  
5 (irritable adj3 (colon or bowel)).mp. (33903)  
6 or/1-5 (1406078)  
7 exp narcotic analgesic agent/ (379013)  
8 (opioid\* or opiate\*).mp. (232259)  
9 (alfentanil or alphaprodine or beta-casomorphin\$ or buprenorphine or carfentanil or codeine or deltorphin or dextromethorphan or dezocine or dihydrocodeine or dihydromorphine or enkephalin\$ or ethylketocyclazocine or ethylmorphine or etorphine or fentanyl or heroin or hydrocodone or hydromorphone or ketobemidone or levorphanol or lofentanil or meperidine or meptazinol or methadone or methadyl acetate or morphine or nalbuphine or opium or oxycodone or oxymorphone or pentazocine or phenazocine or phenoperidine or piritramide or promedol or propoxyphene or remifentanil or sufentanil or tilidine or tapentadol).mp. [mp=title, abstract, heading word, drug trade

name, original title, device manufacturer, drug manufacturer, device trade name, keyword heading word, floating subheading word, candidate term word] (321772)

10 (adolonta or Anpec or Ardinex or Asimadoline or Alvimopam or amadol or biodalgic or biokanol or Codinovo or contramal or Demerol or Dicodid or Dihydrocodeinone or dihydromorphinone or dihydrohydroxycodone or dihydronone or dilaudid or dinarkon or dolsin or dolosal or dolin or dolantin or dolargan or dolcontral or duramorph or duromorph or duragesic or durogenic or eucodal or Fedotzine or Fentanest or Fentora or Fortral or Hycodan or Hycon or Hydrocodone or Hydrocodeinonebitartrate or hydromorphon or hydroxycodone or isocodeine or isonipeccain or jutadol or laudacon or l dromoran or levodroman or levorphan or levo-dromoran or levodromoran or lexir or lidol or lydol or morfin or morfine or morphia or morphin or morphinium or morphinene or morphium or ms contin or n-methylmorphine or n methylmorphine or nobligan or numorphan or oramorph or oxycodone or oxiconum or oxycone or oxycontin or palladone or pancodine or pethidine or phentanyl or prontosfort or robidone or skenan or sublimaze or sulfentanyl or sulfentanil or sufenta or takadol or talwin or theocodin or tramadol or tramadolhameln or tramador or tramadura or tramagetic or tramagit or tramake or tramal or tramex or tramundin or trasedal or theradol or tiral or topalgic or tradol or tradolpuren or tradonal or tralgiol or tramadorsch or tramadin or tramadoc or ultram or zamudol or zumalgic or zydol or zytram).mp. [mp=title, abstract, heading word, drug trade name, original title, device manufacturer, drug manufacturer, device trade name, keyword heading word, floating subheading word, candidate term word] (59179)

11 or/7-10 (478289)

12 6 and 11 (86545)

13 drug overdose/ or intoxication/ (209934)

14 exp drug misuse/ (10788)

15 (overdos\* or poison\*).mp. [mp=title, abstract, heading word, drug trade name, original title, device manufacturer, drug manufacturer, device trade name, keyword heading word, floating subheading word, candidate term word] (174162)

16 mortality/ or death/ (1073718)

17 (mortality or death).ti,ab. (2273353)

18 or/13-17 (2845489)

19 12 and 18 (8107)

20 clinical study/ (160539)

21 case control study/ (193429)

22 family study/ (25694)

23 longitudinal study/ (179050)

24 retrospective study/ (1315395)

25 prospective study/ (798586)

26 randomized controlled trials/ (235679)

27 25 not 26 (789160)

28 cohort analysis/ (901841)

29 (Cohort adj (study or studies)).mp. [mp=title, abstract, heading word, drug trade name, original title, device manufacturer, drug manufacturer, device trade name, keyword heading word, floating subheading word, candidate term word] (422852)

30 (Case control adj (study or studies)).mp. [mp=title, abstract, heading word, drug trade name, original title, device manufacturer, drug manufacturer, device trade name, keyword heading word, floating subheading word, candidate term word] (255086)

31 (follow up adj (study or studies)).mp. [mp=title, abstract, heading word, drug trade name, original title, device manufacturer, drug manufacturer, device trade name, keyword heading word, floating subheading word, candidate term word] (74294)

32 (observational adj (study or studies)).mp. [mp=title, abstract, heading word, drug trade name, original title, device manufacturer, drug manufacturer, device trade name, keyword heading word, floating subheading word, candidate term word] (354731)

33 (epidemiologic\$ adj (study or studies)).mp. [mp=title, abstract, heading word, drug trade name, original title, device manufacturer, drug manufacturer, device trade name, keyword heading word, floating subheading word, candidate term word] (123487)

34 (cross sectional adj (study or studies)).mp. [mp=title, abstract, heading word, drug trade name, original title, device manufacturer, drug manufacturer, device trade name, keyword heading word, floating subheading word, candidate term word] (557146)

35 or/20-24,27-34 (3798235)

36 19 and 35 (1571)

## PsycInfo

- 1 exp opiates/ (28821)
- 2 (opioid\* or opiate\*).mp. [mp=title, abstract, heading word, table of contents, key concepts, original title, tests & measures, mesh word] (39529)
- 3 (alfentanil or alphaprodine or beta-casomorphin\$ or buprenorphine or carfentanil or codeine or deltorphin or dextromethorphan or dezocine or dihydrocodeine or dihydromorphine or enkephalin\$ or ethylketocyclazocine or ethylmorphine or etorphine or fentanyl or heroin or hydrocodone or hydromorphone or ketobemidone or levorphanol or lofentanil or meperidine or meptazinol or methadone or methadyl acetate or morphine or nalbuphine or opium or oxycodone or oxymorphone or pentazocine or phenazocine or phenoperidine or piritramide or promedol or propoxyphene or remifentanil or sufentanil or tilidine or tapentadol).mp. [mp=title, abstract, heading word, table of contents, key concepts, original title, tests & measures, mesh word] (34521)
- 4 (narcotic\* or adolonta or Anpec or Ardinex or Asimadoline or Alvimopam or amadol or biodalgic or biokanol or Codinovo or contramal or Demerol or Dicodid or Dihydrocodeinone or dihydromorphinone or dihydrohydroxycodone or dihydronone or dilaudid or dinarkon or dolsin or dolosal or dolin or dolantin or dolargan or dolconal or duramorph or duromorph or duragesic or durogesic or eucodal or Fedotzine or Fentanest or Fentora or Fortral or Hycodan or Hycon or Hydrocodone or Hydrocodeinonebitartrate or hydromorphon or hydroxycodone or isocodeine or isonipecaïn or jutadol or laudacon or l dromoran or levodroman or levorphan or levo-dromoran or levodromoran or lexir or lidol or lydol or morfin or morfine or morphia or morphin or morphinium or morphinene or morphium or ms contin or n-methylmorphine or n methylmorphine or nobligan or numorphan or oramorph or oxycodone or oxiconum or oxycone or oxycontin or palladone or pancodine or pethidine or phentanyl or prontofort or robidone or skenan or sublimaze or sulfentanyl or sulfentanil or sufenta or takadol or talwin or theocodin or tramadol or tramadolhameln or tramadol or tramadura or tramagetic or tramagit or tramake or tramal or tramex or tramundin or trasedal or theradol or tiral or topalgic or tradol or tradolpuren or tradonal or tralgiol or tramadorsch or tramadin or tramadoc or ultram or zamudol or zumalgic or zydol or zytram).mp. [mp=title, abstract, heading word, table of contents, key concepts, original title, tests & measures, mesh word] (15146)
- 5 or/1-4 (59819)
- 6 chronic pain/ or back pain/ or myofascial pain/ or somatoform pain disorder/ (19047)
- 7 ((chronic\* or recur\* or persist\* or non-malign\* or malign\* or noncancer\* or non-cancer\* or cancer\*) adj3 pain).mp. [mp=title, abstract, heading word, table of contents, key concepts, original title, tests & measures, mesh word] (29560)
- 8 (osteoarthritis\* or osteo-arthritis or degenerative arthritis\* or neuralgia\* or zoster or IBS or migraine\* or complex regional pain syndromes or causalgia or radiculopathy\* or headache\* or whiplash\* or TMD or backache\* or backpain\* or dorsalgia\* or arthralgia\* or polyarthralgia\* or arthrodynia\* or myalgia\* or fibromyalgia\* or myodynin\* or neuralgia\* or ischialgia\* or crps or rachialgia\*).mp. [mp=title, abstract, heading word, table of contents, key concepts, original title, tests & measures, mesh word] (38999)
- 9 ((back or discogen\* or bone or musculoskeletal\* or muscle\* or skeletal\* or spinal or spine or vertebra\* or joint\* or arthritis or Intestin\* or neuropath\* or neck or cervical\* or head or facial\* or complex or radicular or cervicobrachial\* or orofacial or somatic or shoulder\* or knee\* or hip or hips or TMJ or TMJD) adj3 pain).mp. [mp=title, abstract, heading word, table of contents, key concepts, original title, tests & measures, mesh word] (23406)
- 10 (irritable adj3 (colon or bowel)).mp. [mp=title, abstract, heading word, table of contents, key concepts, original title, tests & measures, mesh word] (2014)
- 11 or/6-10 (73816)
- 12 5 and 11 (6679)
- 13 drug overdoses/ (2501)
- 14 drug abuse/ (49049)
- 15 (overdos\* or poison\*).mp. [mp=title, abstract, heading word, table of contents, key concepts, original title, tests & measures, mesh word] (13196)
- 16 exp "death and dying"/ (45080)
- 17 (mortality or death).ti,ab. (124001)
- 18 or/13-17 (189905)
- 19 12 and 18 (870)
- 20 epidemiology/ (54215)
- 21 Case control.tw. (12411)
- 22 (cohort adj (study or studies)).tw. (27110)
- 23 Cohort analy\$.tw. (1061)

- 24 (Follow up adj (study or studies)).tw. (13933)
- 25 (observational adj (study or studies)).tw. (12905)
- 26 Longitudinal.tw. (136933)
- 27 Retrospective.tw. (41484)
- 28 Cross sectional.tw. (98685)
- 29 or/20-28 (349650)
- 30 19 and 29 (175)

## CINAHL

- S1 (MH "Analgesics, Opioid+")
- S10 (MH "Arthritis, Rheumatoid+")
- S11 (MH "Neuralgia+")
- S12 (MH "Diabetic Neuropathies+")
- S13 (MH "Irritable Bowel Syndrome")
- S14 (MH "Migraine")
- S15 (MH "Fibromyalgia")
- S16 (MH "Complex Regional Pain Syndromes") OR (MH "Reflex Sympathetic Dystrophy") OR (MH "Causalgia")
- S17 (MH "Phantom Limb")
- S18 (MH "Hyperalgesia")
- S19 (MH "Back Pain+")
- S2 TX opioid\* or opiate\*
- S20 (MH "Radiculopathy")
- S21 (MH "Headache+")
- S22 (MH "Arthralgia")
- S23 (MH "Temporomandibular Joint Diseases+")
- S24 (MH "Whiplash Injuries")
- S25 (MH "Cumulative Trauma Disorders")
- S26 (MH "Peripheral Nervous System Diseases/DT")
- S27 TX osteoarthritis\* or osteo-arthritis or degenerative arthrit\* or neuralg\* or zoster or IBS or migraine\* or complex regional pain syndromes or causalgia or radiculopath\* or headache\* or whiplash\* or TMD or backache\* or backpain\* or dorsalg\* or arthralgi\* or polyarthralgi\* or arthrodyni\* or myalgi\* or fibromyalgi\* or myodyn\* or neuralgi\* or ischialgi\* or crps or rachialgi\*
- S28 TX ((back or discogen\* or bone or musculoskelet\* or muscle\* or skelet\* or spinal or spine or vertebra\* or joint\* or arthritis or Intestin\* or neuropath\* or neck or cervical\* or head or facial\* or complex or radicular or cervicobrachi\* or orofacial or somatic or shoulder\* or knee\* or hip or hips or TMJ or TMJD) N3 pain)
- S29 TX (irritable N3 (colon or bowel))
- S3 TX alfentanil or alphaprodine or beta-casomorphin\$ or buprenorphine or carfentanil or codeine or deltorphin or dextromethorphan or dezocine or dihydrocodeine or dihydromorphine or enkephalin\$ or ethylketocyclazocine or ethylmorphine or etorphine or fentanyl or heroin or hydrocodone or hydromorphone or ketobemidone or levorphanol or lofentanil or meperidine or meptazinol or methadone or methadyl acetate or morphine or nalbuphine or opium or oxycodone or oxymorphone or pentazocine or phenazocine or phenoperidine or piritramide or promedol or propoxyphene or remifentanil or sufentanil or tilidine or tapentadol
- S30 S6 OR S7 OR S8 OR S9 OR S10 OR S11 OR S12 OR S13 OR S14 OR S15 OR S16 OR S17 OR S18 OR S19 OR S20 OR S21 OR S22 OR S23 OR S24 OR S25 OR S26 OR S27 OR S28 OR S29
- S31 S5 AND S30
- S32 (MH "Overdose")
- S33 (MH "Substance Abuse+")
- S34 TX overdos\* or poison\*
- S35 (MH "Mortality")
- S36 (MH "Death")
- S37 TI mortality or death
- S38 AB mortality or death
- S39 S32 OR S33 OR S34 OR S35 OR S36 OR S37 OR S38
- S4 TX narcotic\* or adolonta or Anpec or Ardinex or Asimadoline or Alvimopam or amadol or biodalgi or biokanol or Codinovo or contramal or Demerol or Dicodid or Dihydrocodeinone or dihydromorphinone or dihydrohydroxycodeinone or dihydrone or dilaudid or dinarkon or dolsin or dolosal or dolin or dolantin or dolargan or

dolcontral or duramorph or duromorph or duragesic or durogesic or eucodal or Fedotzine or Fentanest or Fentora or Fortral or Hycodan or Hycon or Hydrocodone or Hydrocodeinonebitartrate or hydromorphon or hydroxycodeinon or isocodeine or isonipeccain or jutadol or laudacon or l dromoran or levodroman or levorphan or levo-dromoran or levodromoran or lexis or lidol or lydol or morfín or morfíne or morphia or morphin or morphinium or morphinene or morphium or ms contin or n-methylmorphine or n methylmorphine or nobligan or numorphan or oramorph or oxycodeinon or oxiconum or oxycone or oxycontin or palladone or pancodine or pethidine or phentanyl or prontofort or robidone or skenan or sublimaze or sulfentanyl or sulfentanil or sufenta or takadol or talwin or theocodin or tramadol or tramadolhameln or tramadol or tramadura or tramagetic or tramagit or tramake or tramal or tramex or tramundin or trasedal or theradol or tiral or topalgic or tradol or tradolpuren or tradonal or tralgiol or tramadorsch or tramadin or tramadoc or ultram or zamudol or zumalgic or zydol or zytram

S40 S31 AND S39  
S41 (MH "Epidemiological Research")  
S42 (MH "Case Control Studies+")  
S43 (MH "Prospective Studies+")  
S44 TX Case control  
S45 TX (cohort N1 (study or studies))  
S46 TX Cohort analy\*  
S47 TX (Follow up N1 (study or studies))  
S48 TX (observational N1(study or studies))  
S49 "Longitudinal"  
S5 S1 OR S2 OR S3 OR S4  
S50 (MH "Retrospective Design") OR "Retrospective"  
S51 (MH "Cross Sectional Studies") OR "Cross sectional"  
S52 S41 OR S42 OR S43 OR S44 OR S45 OR S46 OR S47 OR S48 OR S49 OR S50 OR S51  
S53 S40 AND S52  
S6 TX ((chronic\* or recur\* or persist\* or non-malign\* or malign\* or noncancer\* or non-cancer\* or cancer\*) N3 pain)  
S7 (MH "Chronic Pain")  
S8 (MH "Cancer Pain")  
S9 (MH "Osteoarthritis+")

### Web of Science

15 #14 AND #11 888  
14 #12 OR #13 2,611,196  
13 TS=(Longitudinal or Retrospective or Cross sectional or epidemiol\*) 2,191,919  
12 TS=((cohort or observational or case-control or cohort) NEAR/3 (study or studies or analy\*)) 687,720  
11 #9 AND #10 3,046  
10 TS=(overdos\* or poison\* or mortality or death) 2,202,776  
9 #8 AND #3 33,358  
8 #4 OR #5 OR #6 OR #7 587,963  
7 TS=(irritable NEAR/3 (colon or bowel) ) 26,118  
6 TS=((back or discogen\* or bone or musculoskelet\* or muscle\* or skelet\* or spinal or spine or vertebra\* or joint\* or arthritis or Intestin\* or neuropath\* or neck or cervical\* or head or facial\* or complex or radicular or cervicobrachi\* or orofacial or somatic or shoulder\* or knee\* or hip or hips or TMJ or TMJD) NEAR/3 pain) 210,437  
5 TS=(osteoarthrit\* or osteo-arthritis or degenerative arthrit\* or neuralg\* or zoster or IBS or migraine\* or complex regional pain syndromes or causalgia or radiculopath\* or headache\* or whiplash\* or TMD or backache\* or backpain\* or dorsalg\* or arthralgi\* or polyarthralgi\* or arthrodyni\* or myalgi\* or fibromyalgi\* or myodyn\* or neuralgi\* or ischialgi\* or crps or rachialgi\*) 346,218  
4 TS(((chronic\* or recur\* or persist\* or non-malign\* or malign\* or noncancer\* or non-cancer\* or cancer\*) NEAR/3 pain)) 122,948  
3 #1 OR #2 254,991  
2 TS=(opioid\* or opiate\*) 144,712



1 TS=(alfentanil or alphaprodine or beta-casomorphin\$ or buprenorphine or carfentanil or codeine or deltorphin or dextromethorphan or dezocine or dihydrocodeine or dihydromorphine or enkephalin\$ or ethylketocyclazocine or ethylmorphine or etorphine or fentanyl or heroin or hydrocodone or hydromorphone or ketobemidone or levorphanol or lofentanil or meperidine or meptazinol or methadone or methadyl acetate or morphine or nalbuphine or opium or oxycodone or oxymorphone or pentazocine or phenazocine or phenoperidine or pirinitramide or promedol or propoxyphene or remifentanil or sufentanil or tilidine or tapentadol or narcotic\* or adolonta or Anpec or Ardinex or Asimadoline or Alvimopam or amadol or biodalgic or biokanol or Codinovo or contramal or Demerol or Dicotid or Dihydrocodeinone or dihydromorphinone or dihydrohydroxycodeinone or dihydrone or dilaudid or dinarkon or dolsin or dolosal or dolin or dolantin or dolargan or dolcontral or duramorph or duromorph or duragesic or durogesic or eucodal or Fedotzine or Fentanest or Fentora or Fortral or Hycodan or Hycon or Hydrocodone or Hydrocodeinonebitartrate or hydromorphon or hydroxycodeinon or isocodeine or isonipecain or jutadol or laudacon or l dromoran or levodroman or levorphan or levo-dromoran or levodromoran or lexir or lidol or lydol or morfin or morfine or morphia or morphin or morphinium or morphinene or morphium or ms contin or n-methylmorphine or n methylmorphine or nobligan or numorphan or oramorph or oxycodeinon or oxiconum or oxycone or oxycontin or palladone or pancodine or pethidine or phentanyl or prontosfort or robidone or skenan or sublimaze or sulfentanyl or sulfentanil or sufenta or takadol or talwin or theocodin or tramadol or tramadolhameln or tramadolol or tramadura or tramagetic or tramagit or tramake or tramal or tramex or tramundin or trasedal or theradol or tiral or topalgic or tradol or tradolpuren or tradonal or tralgiol or tramadorsch or tramadin or tramadoc or ultram or zamudol or zumalgic or zydol or zytram) 175,652

## Section 2 Risk of bias assessment criteria

### 1. Is the source population (sampling frame) representative of the general population? Yes (low risk of bias); no (high risk of bias)

#### Examples of low risk of bias:

- Selection of target population from a representative population roster such as national population registry, or selection from a random sample of a representative study population

#### Examples of high risk of bias:

- Studies where the source population cannot be defined or from unrepresentative populations, e.g., very young or old population, veterans, large proportion of patients disabled or comorbid with substance user disorders, or other mental illness.

### 2. Is the assessment of the outcome accurate both at baseline and at follow-up? Yes (low risk of bias); no (high risk of bias)

#### Examples of low risk of bias:

- Repeated interview or other ascertainment asking about state with validated instrument or method (with demonstrated validity).

#### Examples of high risk of bias:

- Unvalidated instrument or method with concern of accuracy of responses
- Uncertain how information was obtained
- Using ICD 9 or 10 codes of opioid overdose, which included codes for illicit opioid or non-opioid overdose

### 3. Is there little missing data? Yes (low risk of bias); no (high risk of bias)

#### Examples of low risk of bias:

- High response proportion (rate) with little missing data (<20%)

#### Examples of high risk of bias:

- Response proportion (rate) or missing data  $\geq 20\%$

### 4. Whether predictive models were adjusted, at minimum, for age, sex, substance user disorder and any other comorbid mental illness? Yes (low risk of bias); no (high risk of bias)

#### Examples of low risk of bias:

- The regression models adjusted for at least four factors, including age, sex, substance user disorder, and any other comorbid mental illness (e.g., anxiety, depression, bipolar disorder, etc.)

#### Examples of high risk of bias:

- The regression models adjusted a part of four factors, e.g., only age, sex, and other comorbidities but without either substance user disorder, or other mental illness.

### Section 3 Excluded studies

Excluded studies for conference abstracts: n=29

1. Passik SD, Narayana AK, Janka L. Aberrant drug-related behavior observed during a long-term clinical study involving patients taking chronic opioid therapy for persistent pain and fentanyl buccal tablet for breakthrough pain. *Pain Medicine*. 2010;11 (2):320.
2. Barrantes F, Luan FL, Kommareddi M, et al. Painful consequences: Chronic use of prescription opioids is associated with adverse kidney transplant outcomes. *American Journal of Transplantation*. 2011;11:83.
3. Cheatle M, Wasser T, Olugbodi A, Foster C. The prevalence and mediators of suicidal ideation in patients with chronic con-cancer pain. *Journal of Pain*. 2013;14(4):S24.
4. Kaplovitch E, Gomes T, Camacho X, Dhalla I, Mamdani MM, Juurlink DN. Gender, dose escalation and mortality during opioid therapy. *Clinical Toxicology*. 2013;51 (4):334.
5. Turner BJ, Liang Y, Louden CL, Ehler BR, Aung K. Intensity of opioid analgesic prescribing and urgent care services: A national cohort study. *Journal of General Internal Medicine*. 2013;28:S109.
6. Allen C, Meeraus W, Donegan K. The comparative risk of all-cause mortality in older patients prescribed opioids for non-malignant pain: A retrospective observational cohort study. *Drug Safety*. 2015;38 (10):962-963.
7. Gaither JR, Goulet J, Becker W, et al. Mortality and guideline-concordant long-term opioid therapy for pain. *Drug and Alcohol Dependence*. 2015;156:e77.
8. Holbrook A. 2015 - Use of long-acting, vs short-acting, opioids for chronic pain was linked to unintentional overdose. *ACP Journal Club*. 2015;163(2):10-10.
9. Klemisch R. Prescription Opioid Duration of Action and the Risk of Unintentional Overdose among Patients Receiving Opioid Therapy Miller M, Barber CW, Leatherman S, et al. *JAMA Intern Med* 2015;17:608-15. *Journal of Emergency Medicine*. 2015;49(4):593.
10. Laroche M, Liebschutz JM, Zhang F, Ross-Degnan D, Wharam JF. Opioid prescribing after nonfatal overdose and association with repeat overdose. *Journal of General Internal Medicine*. 2015;30:S216.
11. Makris UE, Pugh M, Alvarez CA, Mortensen EM. Exposure to high risk medications is associated with worse outcomes in older veterans with chronic pain. *Journal of the American Geriatrics Society*. 2015;63:S71.
12. Allen C, Meeraus W, Donegan K. Comparative risk of all-cause mortality in older patients prescribed codeine or tramadol for non-malignant pain: Retrospective cohort study. *Pharmacoepidemiology and Drug Safety*. 2016;25 (Supplement 3):368.
13. Anderson JT, Tye E, Haas A, Ahn NU. Predictors of chronic opioid therapy after lumbar fusion surgery for degenerative disc disease in a workers' compensation setting. *Spine Journal*. 2016;16 (10 Supplement 1):S343.
14. Brennan PL, Del Re AC, Henderson PT, Trafton JA. Healthcare system-wide implementation of opioid-safety guideline recommendations: the case of urine drug screening and opioid-patient suicide- and overdose-related events in the Veterans Health Administration. *Translational Behavioral Medicine*. 2016;6(4):605-612.
15. Chenaf C, Kabore JL, Delorme J, et al. Trends in opioid analgesic use, doctor shopping and mortality in France from 2004 to 2014. *Fundamental and Clinical Pharmacology*. 2016;30 (Supplement 1):30-31.
16. Chung CP, Dupont W, Murray K, Hall K, Stein CM, Ray W. Comparative safety of long-acting opioids for non-cancer pain. *Arthritis and Rheumatology*. 2016;68 (Supplement 10):2523-2524.
17. Khodneva Y, Muntner P, Kertesz S, Kissela B, Safford MM. Prescription Opioid Use and Risk of Coronary Heart Disease, Stroke, and Cardiovascular Death Among Adults from a Prospective Cohort (REGARDS Study). *Pain Medicine*. 2016;17(3):444-455.
18. Laroche M, Liebschutz JM, Wharam JF, Zhang F, Ross-Degnan D. Association of urine drug test screening during initiation of chronic opioid therapy with risk of opioid overdose. *Journal of General Internal Medicine*. 2016;31(2):S131.
19. Dave C, Alrwisan A, Zhu Y, Winterstein A, Hartzema A. Concomitant use of opioid and benzodiazepines and the risk of opioid overdose requiring hospitalizations: A retrospective cohort study. *Value in Health*. 2017;20 (5):A212.
20. Gangan N, Pace P, Banahan B, Kirby T, Noble S. Assessment of hospitalizations due to overdose among Mississippi's division of medicaid (DOM) beneficiaries with opioid prescriptions. *Value in Health*. 2017;20 (5):A208.
21. Hoffman EM, Watson J, St Sauver J, Staff N, Klein C. Population-based chronic opioid therapy prevalence among polyneuropathy patients and the resultant impact on functional status and adverse outcomes. *Muscle and Nerve*. 2017;56 (3):547.
22. Lee YH, Huang YN, Chen HY. The mortality and medical service utilization by long-term opioids patients for chronic non-cancer pain. *Pharmacotherapy*. 2017;37 (12):e196.

23. Bakhai S, Thilagar B, Reynolds JL, Leonard KE. Correlates of opiate misuse based on aberrant urine drug tests for patients on chronic opiate therapy in a safety-net, academic primary care clinic. *Journal of Opioid Management*. 2018;14(1):23-33.
24. James J, Jackson SL, Klein JW, et al. Patient characteristics and outcomes following discontinuation of primary care based chronic opioid therapy: A retrospective cohort study. *Journal of General Internal Medicine*. 2018;33 (2 Supplement 1):281.
25. Luu H, Slavova S. Long-term use of high-dose opioid analgesics in Kentucky from 2012 to 2016. *Pharmacoepidemiology and Drug Safety*. 2018;27 (Supplement 2):330.
26. Hill MV, O'Halloran EA, Reddy SS, Sigurdson ER, Farma J. Preoperative Opioid Use in Patients Undergoing Surgical Resection for Treatment of Rectal Cancer. *Journal of the American College of Surgeons*. 2019;229 (4 Supplement 2):e99.
27. Zhou L, Bhattacharjee S, Kwok CK, et al. Dual-trajectories of opioid and Gabapentinoid use and risk of subsequent drug overdose among United States Medicare beneficiaries. *Pharmacoepidemiology and Drug Safety*. 2019;28 (Supplement 2):230-231.
28. Asfaw A, Boden LI. Impact of workplace injury on opioid dependence, abuse, illicit use and overdose: a 36-month retrospective study of insurance claims. *Occupational and Environmental Medicine*. 2020;77(9):648-653.
29. Merlin J, Black A, Becker W, Lorenz K. Long-term opioid therapy and opioid overdose in patients with and without cancer. *Journal of General Internal Medicine*. 2021;36(SUPPL 1):S121.

#### Excluded studies for non-observational studies: n=4

1. Webster LR, Cochella S, Dasgupta N, et al. An analysis of the root causes for opioid-related overdose deaths in the United States. *Pain Medicine*. 2011;12(SUPPL. 2):S26-S35.
2. Reisfield GM, Webster LR. Benzodiazepines in long-term opioid therapy. *Pain Med*. 2013;14(10):1441-1446.
3. Holbrook A. 2015 - Use of long-acting, vs short-acting, opioids for chronic pain was linked to unintentional overdose. *ACP Journal Club*. 2015;163(2):10-10.
4. Chou R. Long-acting opioids for chronic noncancer pain were linked to mortality. *Annals of Internal Medicine*. 2016;165(6):JC34.

#### Excluded studies for unclear or non-chronic pain conditions: n=58

1. Merchant R, Schwartzapfel B, Wolf F, Li W, Carlson L, Rich J. Demographic, geographic, and temporal patterns of ambulance runs for suspected opiate overdose in Rhode Island, 1997-2002. *Substance Use and Misuse*. 2006;41(9):1209-1226.
2. Portenoy RK, Sibirceva U, Smout R, et al. Opioid Use and Survival at the End of Life: A Survey of a Hospice Population. *Journal of Pain and Symptom Management*. 2006;32(6):532-540.
3. Bell JR, Butler B, Lawrance A, Batey R, Salmelainen P. Comparing overdose mortality associated with methadone and buprenorphine treatment. *Drug and Alcohol Dependence*. 2009;104(1-2):73-77.
4. Maloney E, Degenhardt L, Darke S, Nelson EC. Are non-fatal opioid overdoses misclassified suicide attempts? Comparing the associated correlates. *Addictive Behaviors*. 2009;34(9):723-729.
5. Ilgen MA, Zivin K, Austin KL, et al. Severe pain predicts greater likelihood of subsequent suicide. *Suicide Life Threat Behav*. 2010;40(6):597-608.
6. Ødegård E, Amundsen EJ, Kielland KB, Kristoffersen R. The contribution of imprisonment and release to fatal overdose among a cohort of Norwegian drug abusers. *Addiction Research & Theory*. 2010;18(1):51-58.
7. Toblin RL, Paulozzi LJ, Logan JE, Hall AJ, Kaplan JA. Mental Illness and Psychotropic Drug Use Among Prescription Drug Overdose Deaths: A Medical Examiner Chart Review. *Journal of Clinical Psychiatry*. 2010;71(4):491-496.
8. Azoulay D, Jacobs JM, Cialic R, Mor EE, Stessman J. Opioids, Survival, and Advanced Cancer in the Hospice Setting. *Journal of the American Medical Directors Association*. 2011;12(2):129-134.
9. Barrantes F, Luan FL, Kommareddi M, et al. A history of chronic opioid usage prior to kidney transplantation may be associated with increased mortality risk. *Kidney International*. 2013;84(2):390-396.
10. Bonar EE, Ilgen MA, Walton M, Bohnert AS. Associations among pain, non-medical prescription opioid use, and drug overdose history. *Am J Addict*. 2014;23(1):41-47.

11. Chiang JK, Kao YH. Prediction of patient survival by change in daily opioid dosage in advanced cancer patients: A prospective hospital-based epidemiologic study. *Japanese Journal of Clinical Oncology*. 2014;44(12):1189-1197.
12. Ekholm O, Kurita GP, Hojsted J, Juel K, Sjogren P. Chronic pain, opioid prescriptions, and mortality in Denmark: A population-based cohort study. *Pain*. 2014;155(12):2486-2490.
13. Gomes T, Mamdani MM, Dhalla IA, Cornish S, Paterson JM, Juurlink DN. The burden of premature opioid-related mortality. *Addiction*. 2014;109(9):1482-1488.
14. Park TW, Saitz R, Ganoczy D, Ilgen MA, Bohnert ASB. Benzodiazepine prescribing patterns and deaths from drug overdose among US veterans receiving opioid analgesics: Case-cohort study. *BMJ (Online)*. 2015;350.
15. Dilokthornsakul P, Moore G, Campbell JD, et al. Risk Factors of Prescription Opioid Overdose Among Colorado Medicaid Beneficiaries. *Journal of Pain*. 2016;17(4):436-443.
16. Baird J, Faul M, Green TC, et al. A retrospective review of unintentional opioid overdose risk and mitigating factors among acutely injured trauma patients. *Drug and Alcohol Dependence*. 2017;178:130-135.
17. Cauley CE, Anderson G, Haynes AB, Menendez M, Bateman BT, Ladha K. Predictors of In-hospital Postoperative Opioid Overdose After Major Elective Operations A Nationally Representative Cohort Study. *Annals of Surgery*. 2017;265(4):702-708.
18. Cochran G, Gordon AJ, Lo-Ciganic WH, et al. An Examination of Claims-based Predictors of Overdose from a Large Medicaid Program. *Medical Care*. 2017;55(3):291-298.
19. Kelty E, Hulse G. Fatal and non-fatal opioid overdose in opioid dependent patients treated with methadone, buprenorphine or implant naltrexone. *International Journal of Drug Policy*. 2017;46:54-60.
20. Oliva EM, Bowe T, Tavakoli S, et al. Development and applications of the veterans health administration's stratification tool for opioid risk mitigation (STORM) to improve opioid safety and prevent overdose and suicide. *Psychological Services*. 2017;14(1):34-49.
21. Sun EC, Dixit A, Humphreys K, Darnall BD, Baker LC, Mackey S. Association between concurrent use of prescription opioids and benzodiazepines and overdose: retrospective analysis. *Bmj-British Medical Journal*. 2017;356.
22. Tan X, Camacho TF, LeBaron VT, Blackhall LJ, Balkrishnan R. Opioid use among female breast cancer patients using different adjuvant endocrine therapy regimens. *Breast Cancer Research & Treatment*. 2017;165(2):455-465.
23. Campbell CI, Bahorik AL, VanVeldhuisen P, Weisner C, Rubinstein AL, Ray GT. Use of a prescription opioid registry to examine opioid misuse and overdose in an integrated health system. *Prev Med*. 2018;110:31-37.
24. Nadpara PA, Joyce AR, Murrelle EL, et al. Risk factors for serious prescription opioid-induced respiratory depression or overdose: Comparison of commercially insured and veterans health affairs populations. *Pain Medicine (United States)*. 2018;19(1):79-96.
25. Nechuta SJ, Tyndall BD, Mukhopadhyay S, McPheeters ML. Sociodemographic factors, prescription history and opioid overdose deaths: a statewide analysis using linked PDMP and mortality data. *Drug and Alcohol Dependence*. 2018;190:62-71.
26. Olfson M, Wall M, Wang S, Crystal S, Blanco C. Risks of fatal opioid overdose during the first year following nonfatal overdose. *Drug and Alcohol Dependence*. 2018;190:112-119.
27. Patel S, Carmichael JM, Taylor JM, Bounthavong M, Higgins DT. Evaluating the Impact of a Clinical Decision Support Tool to Reduce Chronic Opioid Dose and Decrease Risk Classification in a Veteran Population. *Annals of Pharmacotherapy*. 2018;52(4):325-331.
28. Rose AJ, Bernson D, Chui KKH, et al. Potentially Inappropriate Opioid Prescribing, Overdose, and Mortality in Massachusetts, 2011-2015. *Journal of General Internal Medicine*. 2018;33(9):1512-1519.
29. Chenaf C, Kabore JL, Delorme J, et al. Prescription opioid analgesic use in France: Trends and impact on morbidity-mortality. *European Journal of Pain*. 2019;23(1):124-134.
30. Groenewald CB, Zhou C, Palermo TM, Van Cleve WC. Associations Between Opioid Prescribing Patterns and Overdose Among Privately Insured Adolescents. *Pediatrics*. 2019;144(5).
31. Moyo P, Zhao X, Thorpe CT, et al. Dual Receipt of Prescription Opioids From the Department of Veterans Affairs and Medicare Part D and Prescription Opioid Overdose Death Among Veterans: A Nested Case-Control Study. *Ann Intern Med*. 2019;170(7):433-442.
32. Mudumbai SC, Lewis ET, Oliva EM, et al. Overdose Risk Associated with Opioid Use upon Hospital Discharge in Veterans Health Administration Surgical Patients. *Pain Medicine*. 2019;20(5):1020-1031.
33. Tsai MH, Tsay WI, Her SH, et al. Long-term mortality in older adults with chronic pain: a nationwide population-based study in Taiwan. *European Geriatric Medicine*. 2019;10(5):777-784.

34. Vaegter HB, Stoten M, Silseth SL, et al. Cause-specific mortality of patients with severe chronic pain referred to a multidisciplinary pain clinic: a cohort register-linkage study. *Scandinavian Journal of Pain*. 2019;19(1):93-99.
35. Cho JN, Spence MM, Niu F, Hui RTL, Gray P, Steinberg S. Risk of Overdose with Exposure to Prescription Opioids, Benzodiazepines, and Non-benzodiazepine Sedative-Hypnotics in Adults: a Retrospective Cohort Study. *Journal of General Internal Medicine*. 2020;35(3):696-703.
36. Chua KP, Brummett CM, Conti RM, Bohnert A. Association of Opioid Prescribing Patterns With Prescription Opioid Overdose in Adolescents and Young Adults. *Jama Pediatrics*. 2020;174(2):141-148.
37. Daoust R, Paquet J, Moore L, et al. Opioid Poisoning and Opioid Use Disorder in Older Trauma Patients. *Clinical Interventions in Aging*. 2020;15:763-770.
38. Dossa F, Metcalfe K, Sutradhar R, et al. Influence of opioid prescribing standards on health outcomes among patients with long-term opioid use: a longitudinal cohort study. *CMAJ open*. 2020;8(4):E874-E885.
39. El-Akkad SE, Nolan S, Fairbairn N, et al. The impact of high-dose opioid prescription on mortality rates among people living with HIV: A retrospective cohort study. *International Journal of Drug Policy*. 2020;78:102705.
40. John WS, Wu L-T. Chronic non-cancer pain among adults with substance use disorders: Prevalence, characteristics, and association with opioid overdose and healthcare utilization. *Drug and Alcohol Dependence* Vol 209 2020, ArtID 107902. 2020;209.
41. Macfarlane GJ, Beasley M, Jones GT, Stannard C. The epidemiology of regular opioid use and its association with mortality: Prospective cohort study of 466 486 UK biobank participants. *EClinicalMedicine*. 2020;21:100321.
42. Nam YH, Bilker WB, DeMayo FJ, Neuman MD, Hennessy S. Incidence rates of and risk factors for opioid overdose in new users of prescription opioids among US Medicaid enrollees: A cohort study. *Pharmacoepidemiol Drug Saf*. 2020;29(8):931-938.
43. Siglin J, Sorokin JD, Namiranian K. Incidence of Postoperative Opioid Overdose and New Diagnosis of Opioid Use Disorder Among US Veterans. *Am J Addict*. 2020;29(4):295-304.
44. Smolina K, Crabtree A, Chong M, et al. Prescription-related risk factors for opioid-related overdoses in the era of fentanyl contamination of illicit drug supply: A retrospective case-control study. *Substance Abuse*. 2020.
45. Vitzthum LK, Riviere P, Sheridan P, et al. Predicting Persistent Opioid Use, Abuse, and Toxicity Among Cancer Survivors. *Journal of the National Cancer Institute*. 2020;112(7):720-727.
46. Agnoli A, Xing G, Tancredi DJ, Magnan E, Jerant A, Fenton JJ. Association of Dose Tapering With Overdose or Mental Health Crisis Among Patients Prescribed Long-term Opioids. *JAMA*. 2021;326(5):411-419.
47. Chen TC, Knaggs RD, Chen LC. Association between opioid-related deaths and persistent opioid prescribing in primary care in England: A nested case-control study. *British Journal of Clinical Pharmacology*. 2021.
48. Deng JY, Hou W, Dong XY, et al. A Large-Scale Observational Study on the Temporal Trends and Risk Factors of Opioid Overdose: Real-World Evidence for Better Opioids. *Drugs-Real World Outcomes*. 2021;8(3):393-406.
49. Jasuja GK, Bettano A, Smelson D, et al. Homelessness and Veteran Status in Relation to Nonfatal and Fatal Opioid Overdose in Massachusetts. *Medical Care*. 2021;59:S165-S169.
50. Hallvik SE, El Ibrahim S, Johnston K, et al. Patient outcomes after opioid dose reduction among patients with chronic opioid therapy. *Pain*. 2022;163(1):83-90.
51. Herzig SJ, Anderson TS, Jung Y, Ngo LH, McCarthy EP. Risk factors for opioid-related adverse drug events among older adults after hospital discharge. *Journal of the American Geriatrics Society*. 2022;70(1):228-234.
52. Dunham J, Highland KB, Costantino R, et al. Evaluation of an Opioid Overdose Composite Risk Score Cutoff in Active Duty Military Service Members. *Pain Med* 2022:pna064.
53. Hallvik SE, El Ibrahim S, Johnston K, et al. Patient outcomes after opioid dose reduction among patients with chronic opioid therapy. *Pain* 2022;163(1):83-90.
54. Herzig SJ, Anderson TS, Jung Y, et al. Risk factors for opioid-related adverse drug events among older adults after hospital discharge. *J Am Geriatr Soc* 2022;70(1):228-34. doi: 10.1111/jgs.17453
55. Kim KW, Brodeur PG, Mullen MA, et al. Postoperative Pain Management Following Orthopedic Spine Procedures and Consequent Acute Opioid Poisoning: An Analysis of New York State From 2009 to 2018. *Spine (03622436)* 2022;47(18):1270-78.
56. Luo C, Chen K, Doshi R, et al. The association of prescription opioid use with suicide attempts: An analysis of statewide medical claims data. *PLoS One* 2022;17(6):e0269809.
57. Weiner SG, El Ibrahim S, Hendricks MA, et al. Factors Associated With Opioid Overdose After an Initial Opioid Prescription. *JAMA NETWORK OPEN* 2022;5(1)

58. Weiner SG, Hendricks MA, El Ibrahim S, et al. Opioid-related overdose and chronic use following an initial prescription of hydrocodone versus oxycodone. *PLOS ONE* 2022;17(4)

Excluded studies for unclear or non-prescriptions of opioids: n=38

1. Gallerani M, Manfredini R, Dal Monte D, Calo G, Brunaldi V, Simonato M. Circadian differences in the individual sensitivity to opiate overdose. *Critical Care Medicine*. 2001;29(1):96-101.
2. Wisniewski AM, Purdy CH, Blondell RD. The epidemiologic association between opioid prescribing, non-medical use, and emergency department visits. *Journal of Addictive Diseases*. 2008;27(1):1-11.
3. Barth KS, Becker WC, Wiedemer NL, et al. Association Between Urine Drug Test Results and Treatment Outcome in High-Risk Chronic Pain Patients on Opioids. *Journal of Addiction Medicine*. 2010;4(3):167-173.
4. Green TC, Black R, Serrano JMG, Budman SH, Butler SF. Typologies of Prescription Opioid Use in a Large Sample of Adults Assessed for Substance Abuse Treatment. *Plos One*. 2011;6(11).
5. Green TC, Grau LE, Carver HW, Kinzly M, Heimer R. Epidemiologic trends and geographic patterns of fatal opioid intoxications in Connecticut, USA: 1997-2007. *Drug and Alcohol Dependence*. 2011;115(3):221-228.
6. Bohnert ASB, Ilgen MA, Ignacio RV, McCarthy JF, Valenstein M, Blow FC. Risk of death from accidental overdose associated with psychiatric and substance use disorders. *American Journal of Psychiatry*. 2012;169(1):64-70.
7. Paulozzi LJ, Kilbourne EM, Shah NG, et al. A History of Being Prescribed Controlled Substances and Risk of Drug Overdose Death. *Pain Medicine*. 2012;13(1):87-95.
8. Seal KH, Shi Y, Cohen G, et al. Association of mental health disorders with prescription opioids and high-risk opioid use in US veterans of Iraq and Afghanistan. *JAMA*. 2012;307(9):940-947.
9. Fisher J, Urquhart R, Johnston G. Use of opioid analgesics among older persons with colorectal cancer in two health districts with palliative care programs. *Journal of Pain and Symptom Management*. 2013;46(1):20-29.
10. Herzig SJ, Rothberg MB, Cheung M, Ngo LH, Marcantonio ER. Opioid utilization and opioid-related adverse events in nonsurgical patients in US hospitals. *J Hosp Med*. 2014;9(2):73-81.
11. Mosher HJ, Jiang L, Vaughan Sarrazin MS, Cram P, Kaboli PJ, Vander Weg MW. Prevalence and characteristics of hospitalized adults on chronic opioid therapy. *Journal of Hospital Medicine (Online)*. 2014;9(2):82-87.
12. Jones CM, McAninch JK. Emergency department visits and overdose deaths from combined use of opioids and benzodiazepines. *American Journal of Preventive Medicine*. 2015;49(4):493-501.
13. Wagner KD, Liu L, Davidson PJ, Cuevas-Mota J, Armenta RF, Garfein RS. Association between non-fatal opioid overdose and encounters with healthcare and criminal justice systems: Identifying opportunities for intervention. *Drug and Alcohol Dependence*. 2015;153:215-220.
14. Chou R, Ray W. 2016 - Long-acting opioids for chronic noncancer pain were linked to mortality. *ACP Journal Club*. 2016;165(6):9-9.
15. Ray WA, Chung CP, Murray KT, Hall K, Stein CM. Prescription of Long-Acting Opioids and Mortality in Patients With Chronic Noncancer Pain. *JAMA*. 2016;315(22):2415-2423.
16. Austin AE, Proescholdbell SK, Creppage KE, Asbun A. Characteristics of self-inflicted drug overdose deaths in North Carolina. *Drug and Alcohol Dependence*. 2017;181:44-49.
17. Demidenko MI, Dobscha SK, Morasco BJ, Meath THA, Ilgen MA, Lovejoy TI. Suicidal ideation and suicidal self-directed violence following clinician-initiated prescription opioid discontinuation among long-term opioid users. *General Hospital Psychiatry*. 2017;47:29-35.
18. Kandel DB, Hu MC, Griesler P, Wall M. Increases from 2002 to 2015 in prescription opioid overdose deaths in combination with other substances. *Drug and Alcohol Dependence*. 2017;178:501-511.
19. Brat GA, Agniel D, Beam A, et al. Postsurgical prescriptions for opioid naive patients and association with overdose and misuse: retrospective cohort study. *Bmj-British Medical Journal*. 2018;360.
20. Grigoras CA, Karanika S, Velmahos E, et al. Correlation of Opioid Mortality with Prescriptions and Social Determinants: A Cross-sectional Study of Medicare Enrollees. *Drugs*. 2018;78(1):111-121.
21. Bennett AS, Watford JA, Elliott L, Wolfson-Stofko B, Guarino H. Military veterans' overdose risk behavior: Demographic and biopsychosocial influences. *Addictive Behaviors*. 2019;99 (no pagination).
22. Khodneva Y, Richman J, Kertesz S, Safford MM. Gender differences in association of prescription opioid use and mortality: A propensity-matched analysis from the REasons for Geographic And Racial Differences in Stroke (REGARDS) prospective cohort. *Substance abuse*. 2019:1-10.
23. Oh TK, Jeon YT, Choi JW. Trends in chronic opioid use and association with five-year survival in South Korea: a population-based cohort study. *British Journal of Anaesthesia*. 2019;123(5):655-663.



24. Oh TK, Song IA, Lee JH, et al. Preadmission chronic opioid usage and its association with 90-day mortality in critically ill patients: a retrospective cohort study. *British Journal of Anaesthesia*. 2019;122(6):e189-e197.
25. O'Neill S, Graham B, Ennis E. Prescribed pain and mental health medication prior to suicide: A population based case control study. *Journal of Affective Disorders*. 2019;246:195-200.
26. Agnoli A, Jerant A, Becker W, Franks P. Opioid Prescriptions and Short-Term Mortality: a US National Study. *Journal of General Internal Medicine*. 2020;35(3):656-661.
27. Hauser W, Schubert T, Vogelmann T, Maier C, Fitzcharles MA, Tolle T. All-cause mortality in patients with long-term opioid therapy compared with non-opioid analgesics for chronic non-cancer pain: A database study. *BMC Medicine*. 2020;18(1).
28. Meerwijk EL, Larson MJ, Schmidt EM, et al. Nonpharmacological Treatment of Army Service Members with Chronic Pain Is Associated with Fewer Adverse Outcomes After Transition to the Veterans Health Administration. *Journal of General Internal Medicine*. 2020;35(3):775-783.
29. Riggs KR, Hoge AE, DeRussy AJ, et al. Prevalence of and Risk Factors Associated With Nonfatal Overdose Among Veterans Who Have Experienced Homelessness. *JAMA Netw Open*. 2020;3(3):e201190.
30. Wilson JM, Farley KX, Bradbury TL, Erens GA, Guild GN. Preoperative opioid use is a risk factor for complication and increased healthcare utilization following revision total knee arthroplasty. *Knee*. 2020;27(4):1121-1127.
31. Boska RL, Bishop TM, Ashrafioun L. Pain conditions and suicide attempts in military veterans: A case-control design. *Pain medicine (Malden, Mass)*. 2021.
32. Oh T-K, Song I-A, Lee J, Eom W, Jeon Y-T. Musculoskeletal Disorders, Pain Medication, and in-Hospital Mortality among Patients with COVID-19 in South Korea: A Population-Based Cohort Study. *International journal of environmental research and public health*. 2021;18(13).
33. Zhou L, Bhattacharjee S, Kwoh C, et al. Dual-trajectories of opioid and gabapentinoid use and risk of subsequent drug overdose among Medicare beneficiaries in the United States: A retrospective cohort study. *Addiction*. 2021;116(4):819-830.
34. Lynn E, Cousins G, Lyons S, et al. Comparing characteristics of suicide to non-suicide drug poisoning deaths, by sex, in Ireland. *Journal of Affective Disorders* 2022;306:80-89.
35. Marwitz KK, Noureldin M. A descriptive analysis of concomitant opioid and benzodiazepine medication use and associated adverse drug events in United States adults between 2009 and 2018. *Exploratory Research in Clinical and Social Pharmacy* 2022;5:100130.
36. Roussin A, Soeiro T, Fouque C, et al. Increase of high-risk tramadol use and harmful consequences in France from 2013 to 2018: Evidence from the triangulation of addictovigilance data. *Br J Clin Pharmacol* 2022;88(8):3789-802.
37. Sood A, Kuo YF, Westra J, et al. Co-prescribing of Central Nervous System-Active Medications for COPD Patients: Impact on Emergency Room Visits and Hospitalization. *ANNALS OF PHARMACOTHERAPY* 2022
38. Sun M, Chang CL, Lu CY, et al. Survival Impact of Long-Term Tramadol Use on Breast Cancer for Patients with Chronic Pain: A Propensity Score-Matched Population-Based Cohort Study. *Journal of Personalized Medicine* 2022;12(3):02.

**Excluded studies without outcome of interest (fatal or non-fatal overdose): n=35**

1. Passik SD, Kirsh KL, Donaghy KB, Portenoy RK. Pain and aberrant drug-related behaviors in medically ill patients with and without histories of substance abuse. *Clinical Journal of Pain*. 2006;22(2):173-181.
2. Sullivan MD, Edlund MJ, Fan MY, Devries A, Brennan Braden J, Martin BC. Risks for possible and probable opioid misuse among recipients of chronic opioid therapy in commercial and medicaid insurance plans: The TROUP Study. *Pain*. 2010;150(2):332-339.
3. Krebs EE, Becker WC, Zerzan J, Bair MJ, McCoy K, Hui S. Comparative mortality among Department of Veterans Affairs patients prescribed methadone or long-acting morphine for chronic pain. *Pain*. 2011;152(8):1789-1795.
4. Passik SD, Messina J, Golsorkhi A, Xie F. Aberrant drug-related behavior observed during clinical studies involving patients taking chronic opioid therapy for persistent pain and fentanyl buccal tablet for breakthrough pain. *Journal of Pain & Symptom Management*. 2011;41(1):116-125.
5. Colburn JL, Jasinski DR, Rastegar DA. Long-term opioid therapy, aberrant behaviors, and substance misuse: comparison of patients treated by resident and attending physicians in a general medical clinic. *Journal of Opioid Management*. 2012;8(3):153-160.



6. Ilgen MA, Kleinberg F, Ignacio RV, et al. Noncancer pain conditions and risk of suicide. *JAMA Psychiatry*. 2013;70(7):692-697.
7. Joynt M, Train MK, Robbins BW, Halterman JS, Caiola E, Fortuna RJ. The impact of neighborhood socioeconomic status and race on the prescribing of opioids in emergency departments throughout the united states. *Journal of General Internal Medicine*. 2013;28(12):1604-1610.
8. Hasegawa K, Brown DFM, Tsugawa Y, Camargo CA. Epidemiology of Emergency Department Visits for Opioid Overdose: A Population-Based Study. *Mayo Clinic Proceedings*. 2014;89(4):462-471.
9. Childers JW, King LA, Arnold RM. Chronic Pain and Risk Factors for Opioid Misuse in a Palliative Care Clinic. *American Journal of Hospice & Palliative Medicine*. 2015;32(6):654-659.
10. Im JJ, Shachter RD, Oliva EM, et al. Association of Care Practices with Suicide Attempts in US Veterans Prescribed Opioid Medications for Chronic Pain Management. *Journal of General Internal Medicine*. 2015;30(7):979-991.
11. Gaither JR, Goulet JL, Becker WC, et al. The Effect of Substance Use Disorders on the Association Between Guideline-concordant Long-term Opioid Therapy and All-cause Mortality. *Journal of Addiction Medicine*. 2016;10(6):418-428.
12. Larochelle MR, Liebschutz JM, Zhang F, Ross-Degnan D, Wharam JF. Opioid Prescribing After Nonfatal Overdose and Association With Repeated Overdose: A Cohort Study. *Annals of Internal Medicine*. 2016;164(1):1-9.
13. Bohnert KM, Ilgen MA, Louzon S, McCarthy JF, Katz IR. Substance use disorders and the risk of suicide mortality among men and women in the US Veterans Health Administration. *Addiction*. 2017;112(7):1193-1201.
14. Fonda JR, Fredman L, Brogly SB, McGlinchey RE, Milberg WP, Gradus JL. Traumatic Brain Injury and Attempted Suicide Among Veterans of the Wars in Iraq and Afghanistan. *Am J Epidemiol*. 2017;186(2):220-226.
15. Jasuja GK, Ameli O, Reisman JJ, et al. Health Outcomes Among Long-term Opioid Users With Testosterone Prescription in the Veterans Health Administration. *JAMA Network Open*. 2019;2(12):e1917141.
16. Zin CS, Alias NE, Taufek NH, Ahmad MM. Sex differences in high opioid dose escalation among Malaysian patients with long term opioid therapy. *Journal of Pain Research*. 2019;12:1251-1257.
17. Hauser W, Schubert T, Scherbaum N, Tolle T. Long-term opioid therapy of non-cancer pain : Prevalence and predictors of hospitalization in the event of possible misuse. *Der Schmerz*. 2020;34(Suppl 1):8-15.
18. Mazereeuw G, Gomes T, Macdonald EM, et al. Oxycodone, Hydromorphone, and the Risk of Suicide: A Retrospective Population-Based Case-Control Study. *Drug Saf*. 2020;43(8):737-743.
19. Aroke HA, Buchanan AL, Bratberg J, et al. Initial Patterns of Prescription Opioid Supply and Risk of Mortality Among Insured Adults in the United States. *Journal of Addiction Medicine*. 2021;15(2):99-108.
20. Wei Y-JJ, Lewis M, Chen C, Winterstein AG. Trajectories of prescription opioid dose and risk of opioid-related adverse events among older adults. *Pharmacoepidemiology and Drug Safety*. 2021;30(SUPPL 1):370.
21. Zhou L, Bhattacharjee S, Kwok CK, et al. Dual-trajectories of opioid and gabapentinoid use and risk of subsequent drug overdose among Medicare beneficiaries in the United States: a retrospective cohort study. *Addiction* 2020;10:10.
22. Chen C, Winterstein AG, Lo-Ciganic W-H, et al. Concurrent use of prescription gabapentinoids with opioids and risk for fall-related injury among older US Medicare beneficiaries with chronic noncancer pain: A population-based cohort study. *PLoS Medicine* 2022;19(3):1-18.
23. Cochran G, Charron E, Brown JL, et al. Risky alcohol use among patients dispensed opioid medications: A clinical community pharmacy study. *Drug Alcohol Depend* 2022;234
24. Cohen MH, Benning L, Weber KM, et al. Predictors and Consequences of Prescription Opioid Use in Women Living With and Without HIV: 20-Year Follow-Up. *J Womens Health (Larchmt)* 2022;31(8):1188-96.
25. Duan LW, Lee MS, Adams JL, et al. Opioid and Naloxone Prescribing Following Insertion of Prompts in the Electronic Health Record to Encourage Compliance With California State Opioid Law. *JAMA NETWORK OPEN* 2022;5(5)
26. Inoue K, Ritz B, Arah OA. Causal Effect of Chronic Pain on Mortality Through Opioid Prescriptions: Application of the Front-Door Formula. *Epidemiology* 2022;33(4):572-80.
27. Johansson MS, Pottgard A, Sondergaard J, et al. Chronic Opioid Use before and after Exercise Therapy and Patient Education among Patients with Knee or Hip Osteoarthritis: A Cohort Study Based on National Health Registry Data. *Osteoarthritis and Cartilage* 2022;30(Supplement 1):S249-S50.
28. Kerckhove N, Delage N, Bertin C, et al. Cross-sectional study of the prevalence of prescription opioids misuse in French patients with chronic non-cancer pain: An update with the French version of the POMI scale. *Frontiers in Pharmacology* 2022;13 (no pagination)

29. Khouja T, Zhou JF, Gellad WF, et al. Serious opioid-related adverse outcomes associated with opioids prescribed by dentists. *PAIN* 2022;163(8):1571-80.
30. Nataraj N, Strahan AE, Guy GP, Jr., et al. Dose tapering, increases, and discontinuity among patients on long-term high-dose opioid therapy in the United States, 2017-2019. *Drug Alcohol Depend* 2022;234:109392.
31. Rueter M, Baricault B, Lapeyre-Mestre M. Patterns of opioid analgesic prescribing in cancer outpatients during the last year of life in France: A pharmacoepidemiological cohort study based on the French health insurance database. *Therapie* 2022;06:06.
32. Sung M, Smirnova J, Li W, et al. The Association of Prescribed Long-Acting Versus Short-Acting Opioids and Mortality among Older Adults. *J Gen* doi: <https://dx.doi.org/10.1007/s11606-022-07653-8>
33. Thomas AT, Fields KG, Kaye AD, et al. Factors Associated With Prescription Opioid Abuse and Dependence Among Those Reporting Prescription Opioid Misuse: A Retrospective Cross-Sectional Study. *Pain Physician* 2022;25(4):E669-E79.
34. Wei Y-JJ, Chen C, Cheng T-YD, et al. Association of injury after prescription opioid initiation with risk for opioid-related adverse events among older Medicare beneficiaries in the United States: A nested case-control study. *PLoS Medicine* 2022;19(9):e1004101-e01.
35. Wei Y-JJ, Chen C, Lewis MO, et al. Trajectories of prescription opioid dose and risk of opioid-related adverse events among older Medicare beneficiaries in the United States: A nested case-control study. *PLoS Medicine* 2022;19(3):1-18.

**Excluded studies without adjusted analysis: n=18**

1. Overdose deaths involving prescription opioids among medicaid enrollees - Washington, 2004-2007. *Morbidity and Mortality Weekly Report*. 2009;58(42):1171-1175.
2. Braden JB, Russo J, Fan MY, et al. Emergency department visits among recipients of chronic opioid therapy. *Archives of Internal Medicine*. 2010;170(16):1425-1432.
3. Drug overdose deaths --- Florida, 2003-2009. *Morbidity and Mortality Weekly Report*. 2011;60(26):869-872.
4. Gomes T, Juurlink DN, Dhalla IA, Mailis-Gagnon A, Paterson JM, Mamdani MM. Trends in opioid use and dosing among socio-economically disadvantaged patients. *Open Medicine: A Peer-reviewed, Independent, Open-access Journal*. 2011;5(1):e13-22.
5. Lanier WA, Johnson EM, Rolfs RT, Friedrichs MD, Grey TC. Risk factors for prescription opioid-related death, Utah, 2008-2009. *Pain Medicine*. 2012;13(12):1580-1589.
6. Fulton-Kehoe D, Garg RK, Turner JA, et al. Opioid poisonings and opioid adverse effects in workers in Washington state. *Am J Ind Med*. 2013;56(12):1452-1462.
7. Hasegawa K, Espinola JA, Brown DFM, Camargo CA. Trends in U.S. Emergency Department Visits for Opioid Overdose, 1993-2010. *Pain Medicine*. 2014;15(10):1765-1770.
8. Hirsch A, Proescholdbell SK, Bronson W, Dasgupta N. Prescription Histories and Dose Strengths Associated with Overdose Deaths. *Pain Medicine (United States)*. 2014;15(7):1187-1195.
9. Bohnert AS, Logan JE, Ganoczy D, Dowell D. A Detailed Exploration Into the Association of Prescribed Opioid Dosage and Overdose Deaths Among Patients With Chronic Pain. *Medical Care*. 2016;54(5):435-441.
10. Dasgupta N, Funk MJ, Proescholdbell S, Hirsch A, Ribisl KM, Marshall S. Cohort study of the impact of high-dose opioid analgesics on overdose mortality. *Pain Medicine (United States)*. 2016;17(1):85-98.
11. Peterson AB, Matthew Gladden R, Delcher C, et al. Increases in fentanyl-related overdose deaths — Florida and Ohio, 2013-2015. *Morbidity and Mortality Weekly Report*. 2016;65(33):844-849.
12. Rudd RA, Seth P, David F, Scholl L. Increases in drug and opioid-involved overdose deaths — United States, 2010-2015. *Morbidity and Mortality Weekly Report*. 2016;65(50-51):1445-1452.
13. Landsman-Blumberg PB, Katz N, Gajria K, Coutinho AD, Yeung PP, White R. Burden of Alcohol Abuse or Dependence Among Long-Term Opioid Users with Chronic Noncancer Pain. *Journal of Managed Care & Specialty Pharmacy*. 2017;23(7):718-724.
14. Brinkley-Rubinstein L, Macmadu A, Marshall BDL, et al. Risk of fentanyl-involved overdose among those with past year incarceration: Findings from a recent outbreak in 2014 and 2015. *Drug Alcohol Depend*. 2018;185:189-191.
15. Bedene A, Lijfering WM, Niesters M, et al. Opioid Prescription Patterns and Risk Factors Associated With Opioid Use in the Netherlands. *JAMA Network Open*. 2019;2(8):e1910223.
16. Larochelle MR, Bernstein R, Bernson D, et al. Touchpoints - Opportunities to predict and prevent opioid overdose: A cohort study. *Drug and Alcohol Dependence*. 2019;204.

17. Lintzeris N, Santo Jr T, Nielsen S, Degenhardt L, Campbell G. Estimating Centre for Disease Control and Prevention-defined overdose risk in people prescribed opioids for chronic non-cancer pain: implications for take-home naloxone provision. *Internal Medicine Journal*. 2019;49(8):1054-1055.
18. Von Korff M, Saunders K, Dublin S, et al. Impact of Chronic Opioid Therapy Risk Reduction Initiatives on Opioid Overdose. *Journal of Pain*. 2019;20(1):108-117.

Excluded studies with significant postbaseline factors: n=2

1. Liang Y, Goros MW, Turner BJ. Drug Overdose: Differing Risk Models for Women and Men among Opioid Users with Non-Cancer Pain. *Pain Medicine*. 2016;17(12):2268-2279.
2. Liang Y, Turner BJ. Assessing risk for drug overdose in a national cohort: role for both daily and total opioid dose? *Journal of Pain*. 2015;16(4):318-325.

Excluded studies with patients exclusively having prior opioid overdose: n=2:

1. Boscarino JA, Kirchner HL, Pitcavage JM, et al. Factors associated with opioid overdose: a 10-year retrospective study of patients in a large integrated health care system. *Substance Abuse and Rehabilitation* 2016;7:131-41.
2. Ray BR, Lowder EM, Kivisto AJ, et al. EMS naloxone administration as non-fatal opioid overdose surveillance: 6-year outcomes in Marion County, Indiana. *Addiction* 2018;113(12):2271-79.

#### Section 4 Credibility assessment of subgroup effects for substance use disorder

| <b>ICEMEN Criteria</b>                                                                                                       | <b>Current vs. prior</b>                     |
|------------------------------------------------------------------------------------------------------------------------------|----------------------------------------------|
| <b>1: Is the analysis of effect modification based on comparison within rather than between trials?</b>                      | Between-study                                |
| <b>2: For within-trial comparisons, is the effect modification similar from trial to trial?</b>                              | NA                                           |
| <b>3: For between-trial comparisons, is the number of trials large?</b>                                                      | Rather small (4 studies exploring prior SUD) |
| <b>4: Was the direction of effect modification correctly hypothesized a priori?</b>                                          | <b>Definitely yes</b>                        |
| <b>5: Does a test for interaction suggest that chance is an unlikely explanation of the apparent effect modification?</b>    | <b>Chance may not explanation (p=0.01)</b>   |
| <b>6: Did the authors test only a small number of effect modifiers or consider the number in their statistical analysis?</b> | Probably no (7 factors)                      |
| <b>7: Did the authors use a random effects model?</b>                                                                        | <b>Definitely yes</b>                        |
| <b>8: If the effect modifier is a continuous variable, were arbitrary cut points avoided?</b>                                | NA                                           |
| <b>9 Optional: Are there any additional considerations that may increase or decrease credibility?</b>                        |                                              |
| <b>The effect modification persisted after adjustment for other potential effect modifiers</b>                               | <b>Yes</b>                                   |
| <b>The effect modification is consistent across related outcomes:</b>                                                        | <b>Probably yes</b>                          |
| <b>A sensitivity analysis suggested robustness to relevant assumptions</b>                                                   | NA                                           |
| <b>Effect modification supported by external evidence</b>                                                                    | <b>Yes, from observational studies</b>       |
| <b>“Dose-response effect” across levels of the effect modifier</b>                                                           | <b>Yes</b>                                   |
| <b>Risk of bias of the main effects of the individual RCTs or the meta-analysis</b>                                          | NA                                           |
| <b>The meta-analysis had had exceptionally high power to detect the effect modification</b>                                  | <b>Yes</b>                                   |
| <b>Overall credibility</b>                                                                                                   | <b>Moderate</b>                              |

\*ICEMAN: Instrument for assessing the Credibility of Effect Modification Analyses

\*NA: not applicable
